# Supplementary material
Source: ML conference proceedings conference paper supplement (https://aclanthology.org/2026.semeval-1.371)

# Standard Deviation of <full\_context, judged\_meaning> All Example Pairs

## Similarity Scores for CCE

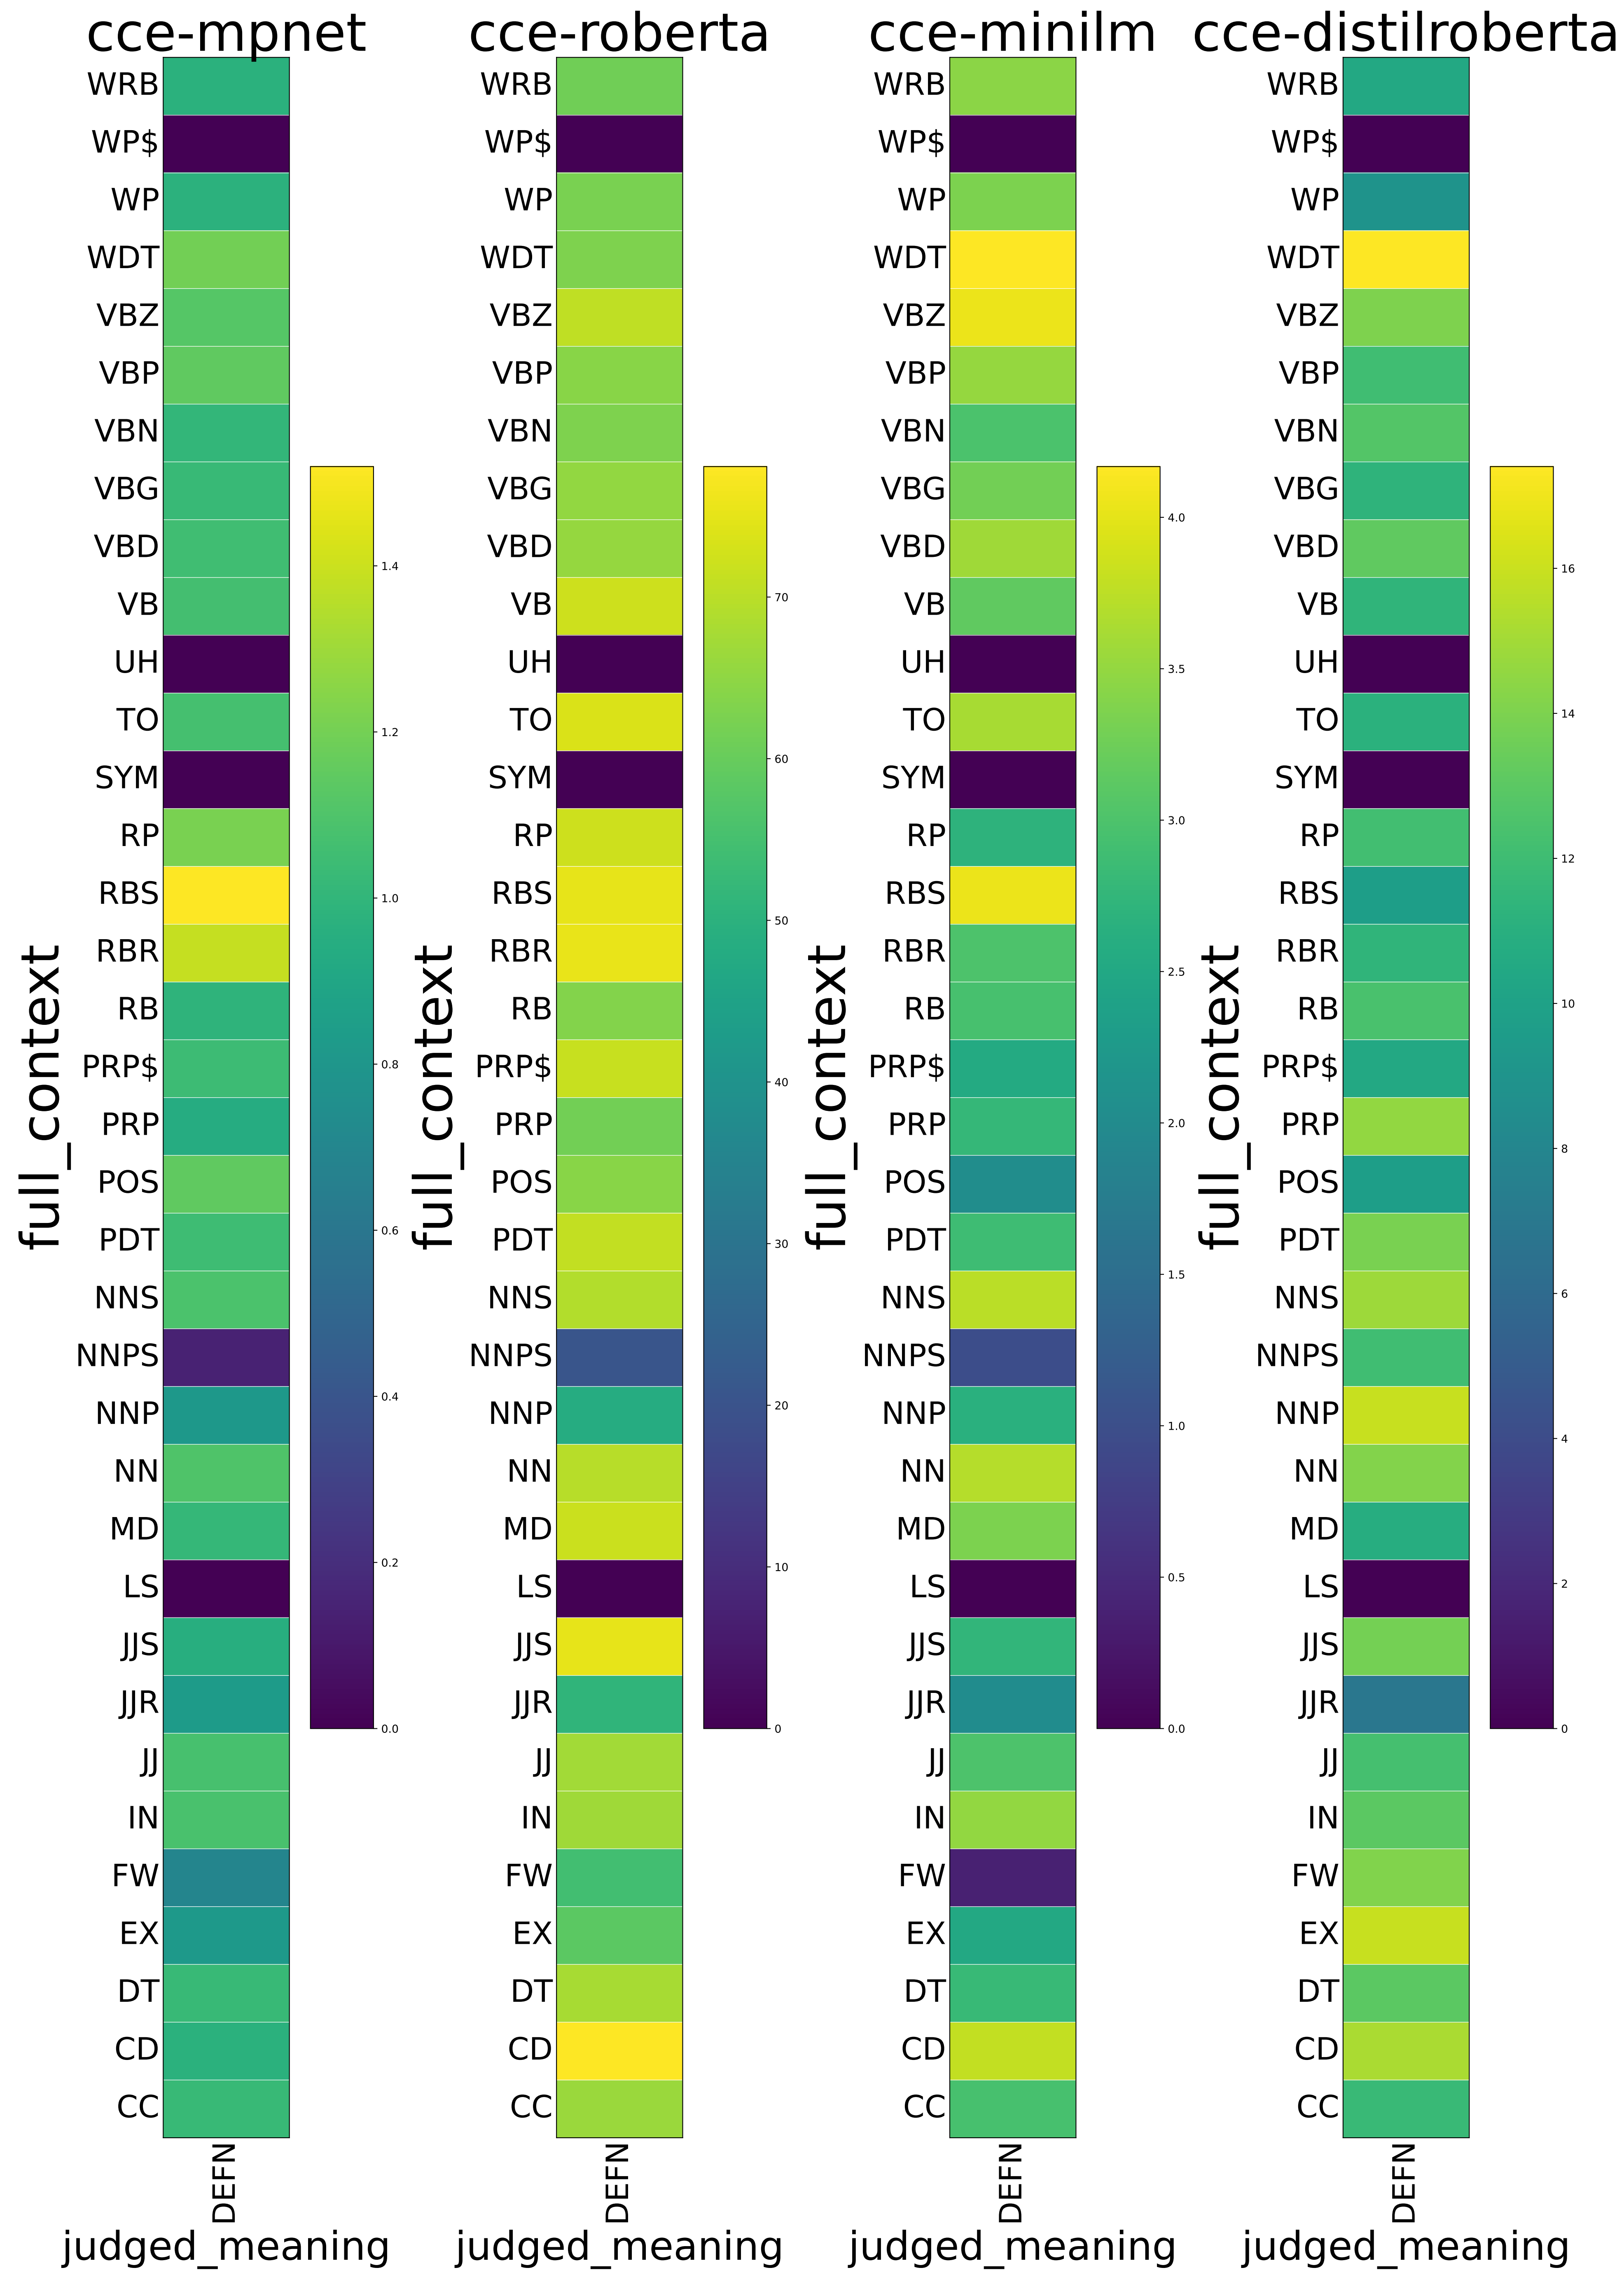

Supplement: SupplementaryMaterial [file cce_std_all.pdf › figures/cce_std_all.pdf]
