# Supplementary material
Source: ML conference proceedings conference paper supplement (https://aclanthology.org/2026.semeval-1.371)

Standard Deviation of <full\_context, judged\_meaning> Positive Example Pairs  
Similarity Scores for DXA

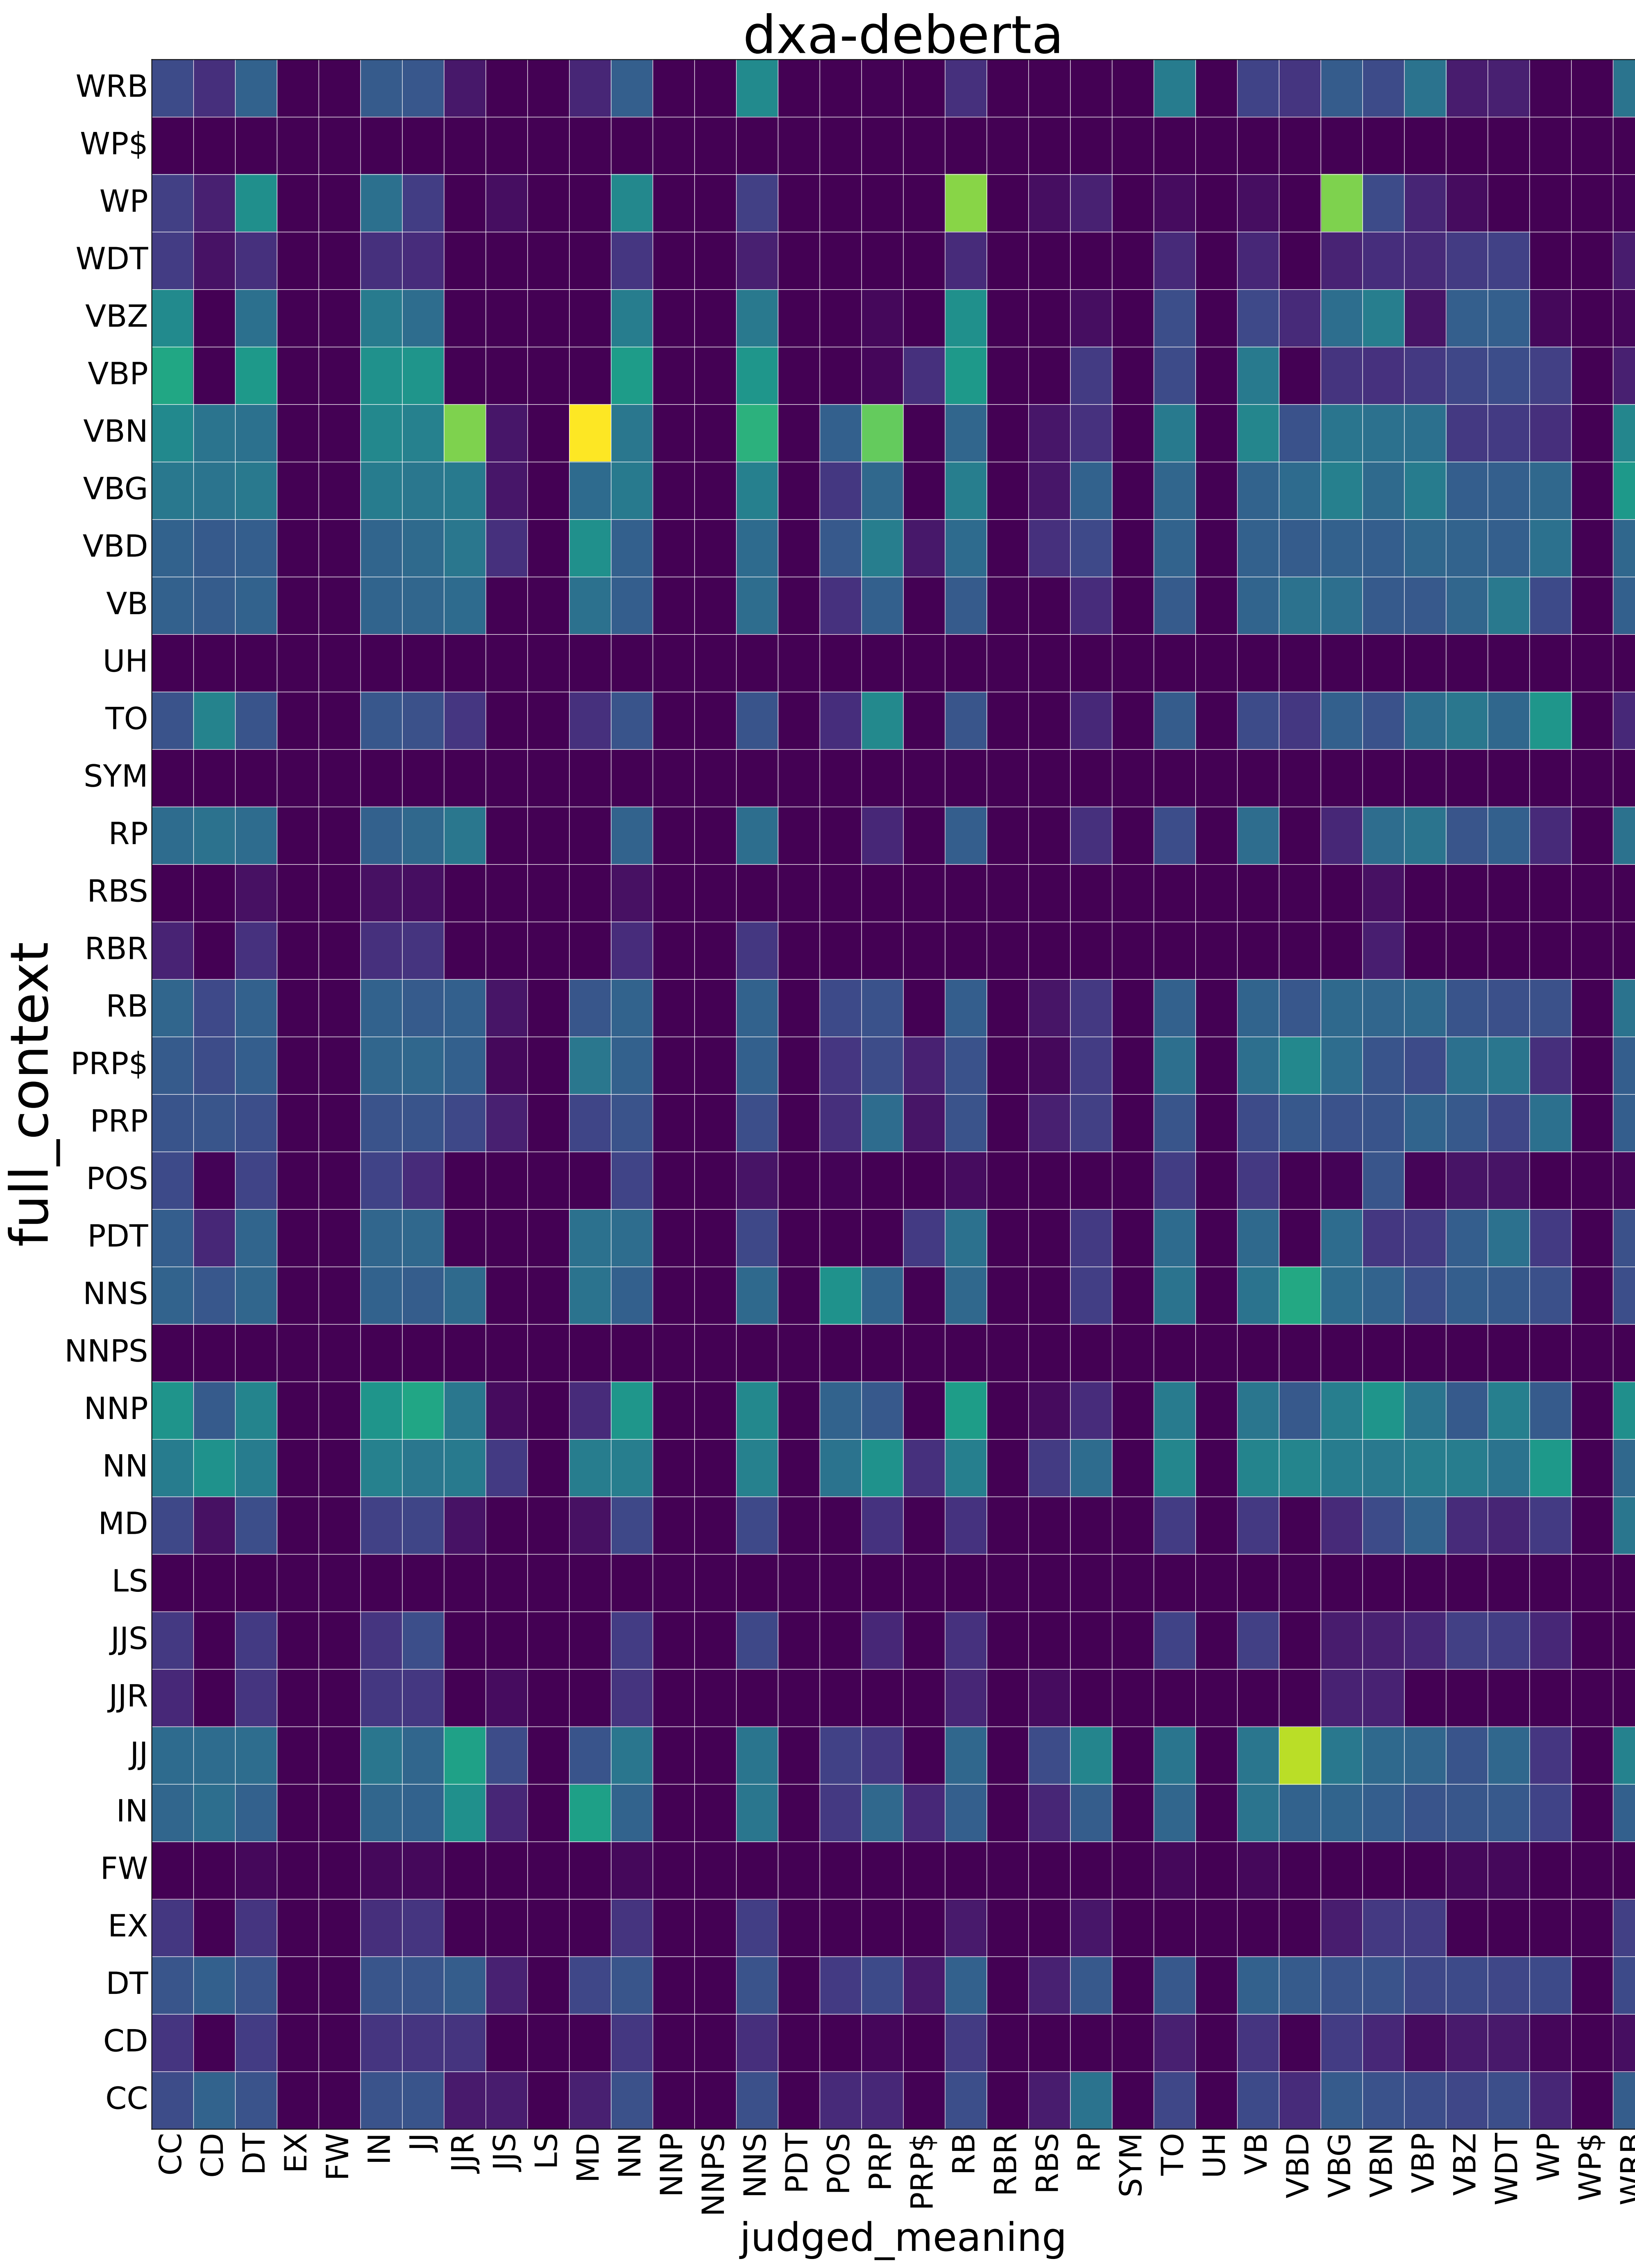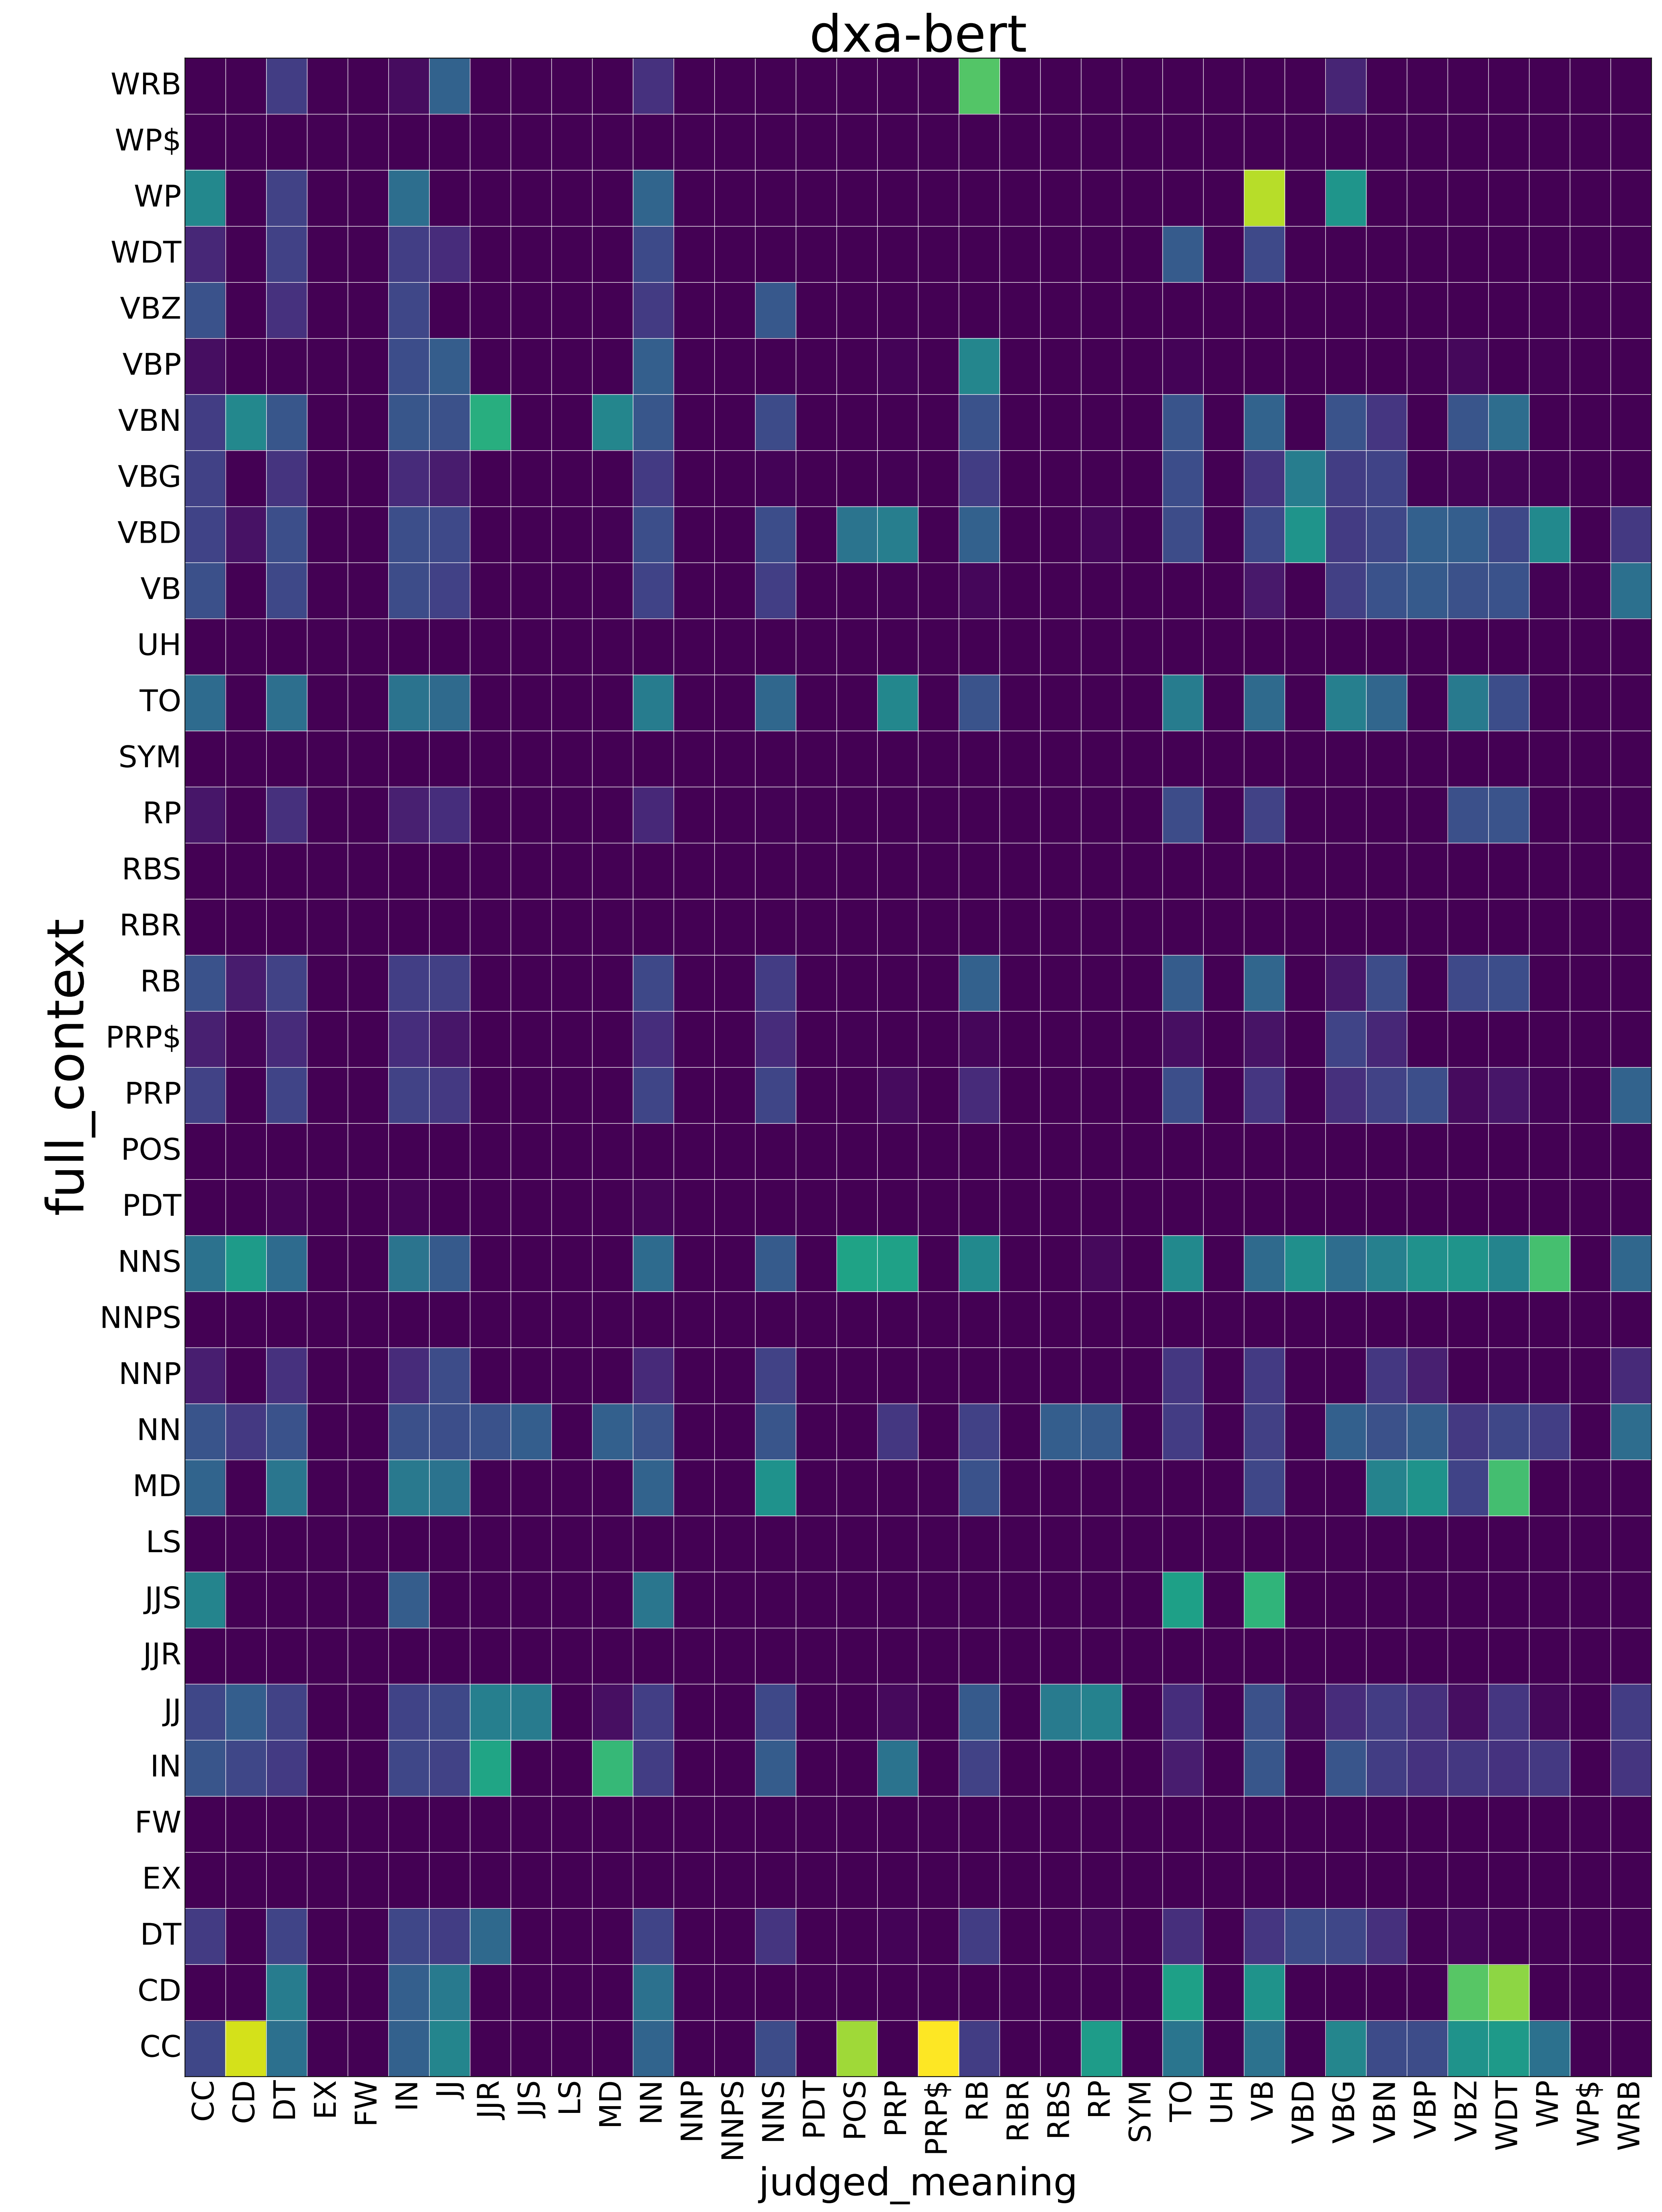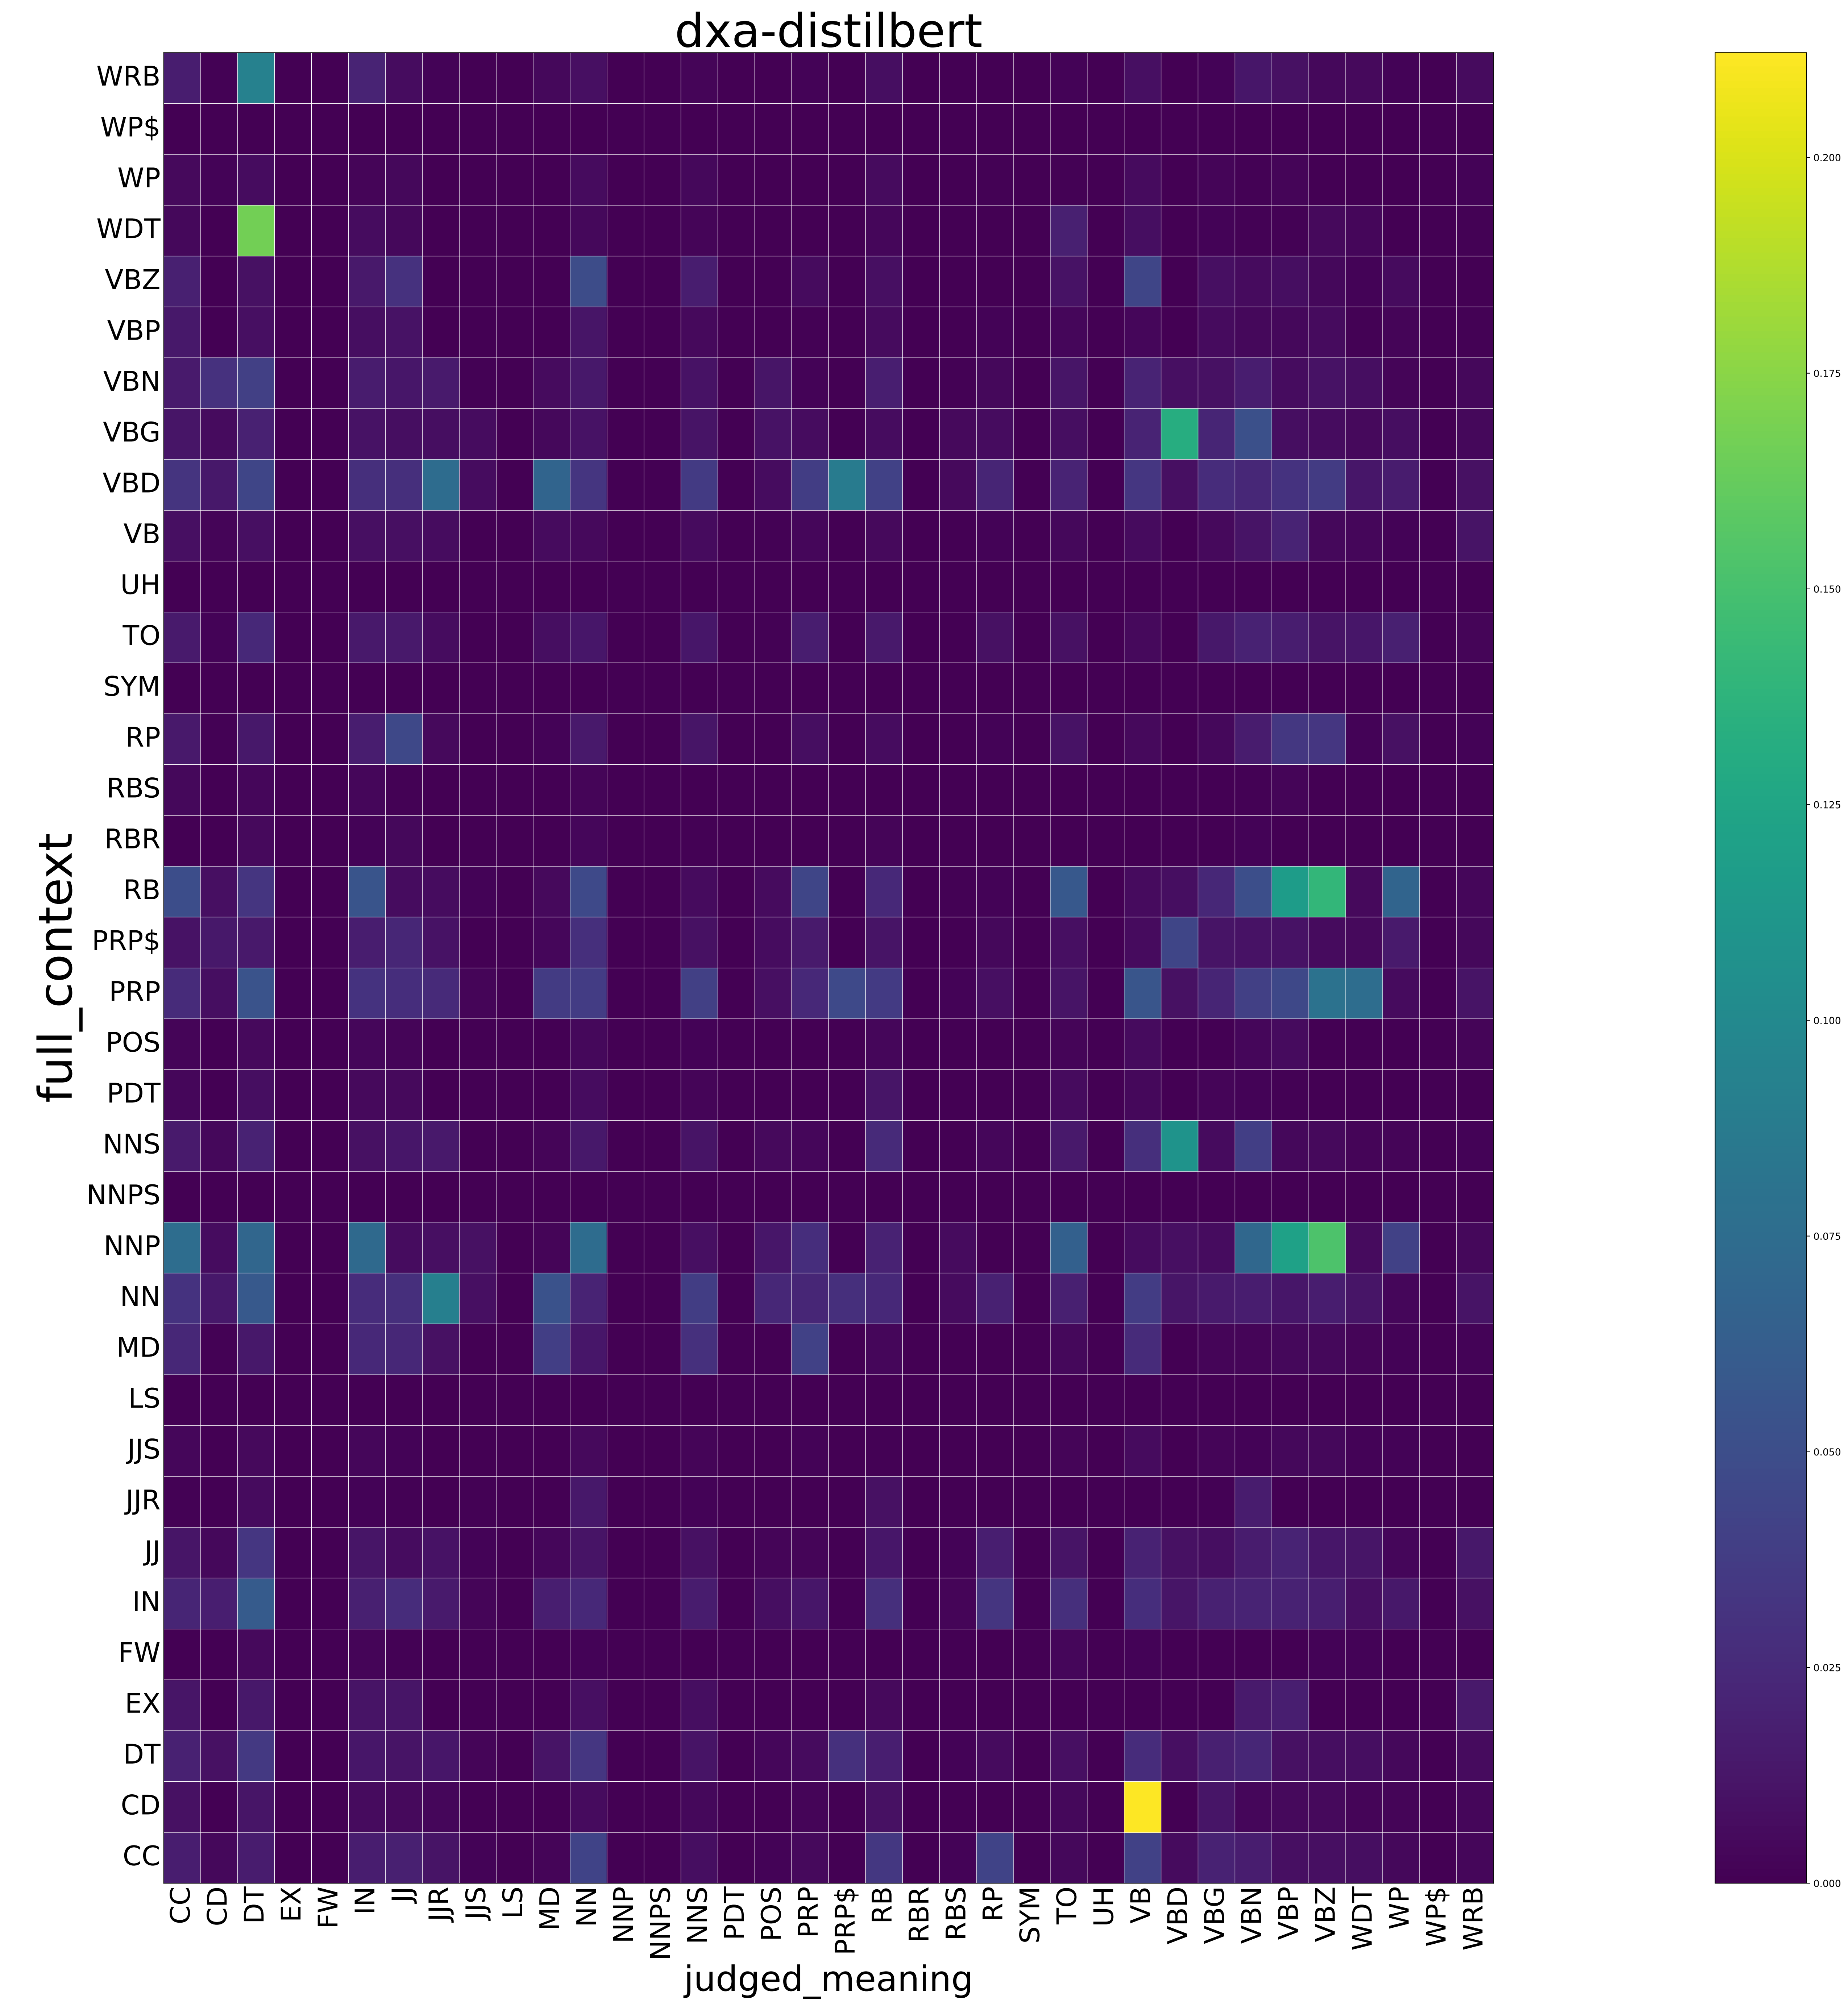

Supplement: SupplementaryMaterial [file dxa_std_positive.pdf › figures/dxa_std_positive.pdf]
