# Supplementary material
Source: ML conference proceedings conference paper supplement (https://aclanthology.org/2026.semeval-1.371)

# Counts of <full\_context, judged\_meaning> All Example Pairs

## Similarity Scores for CCE

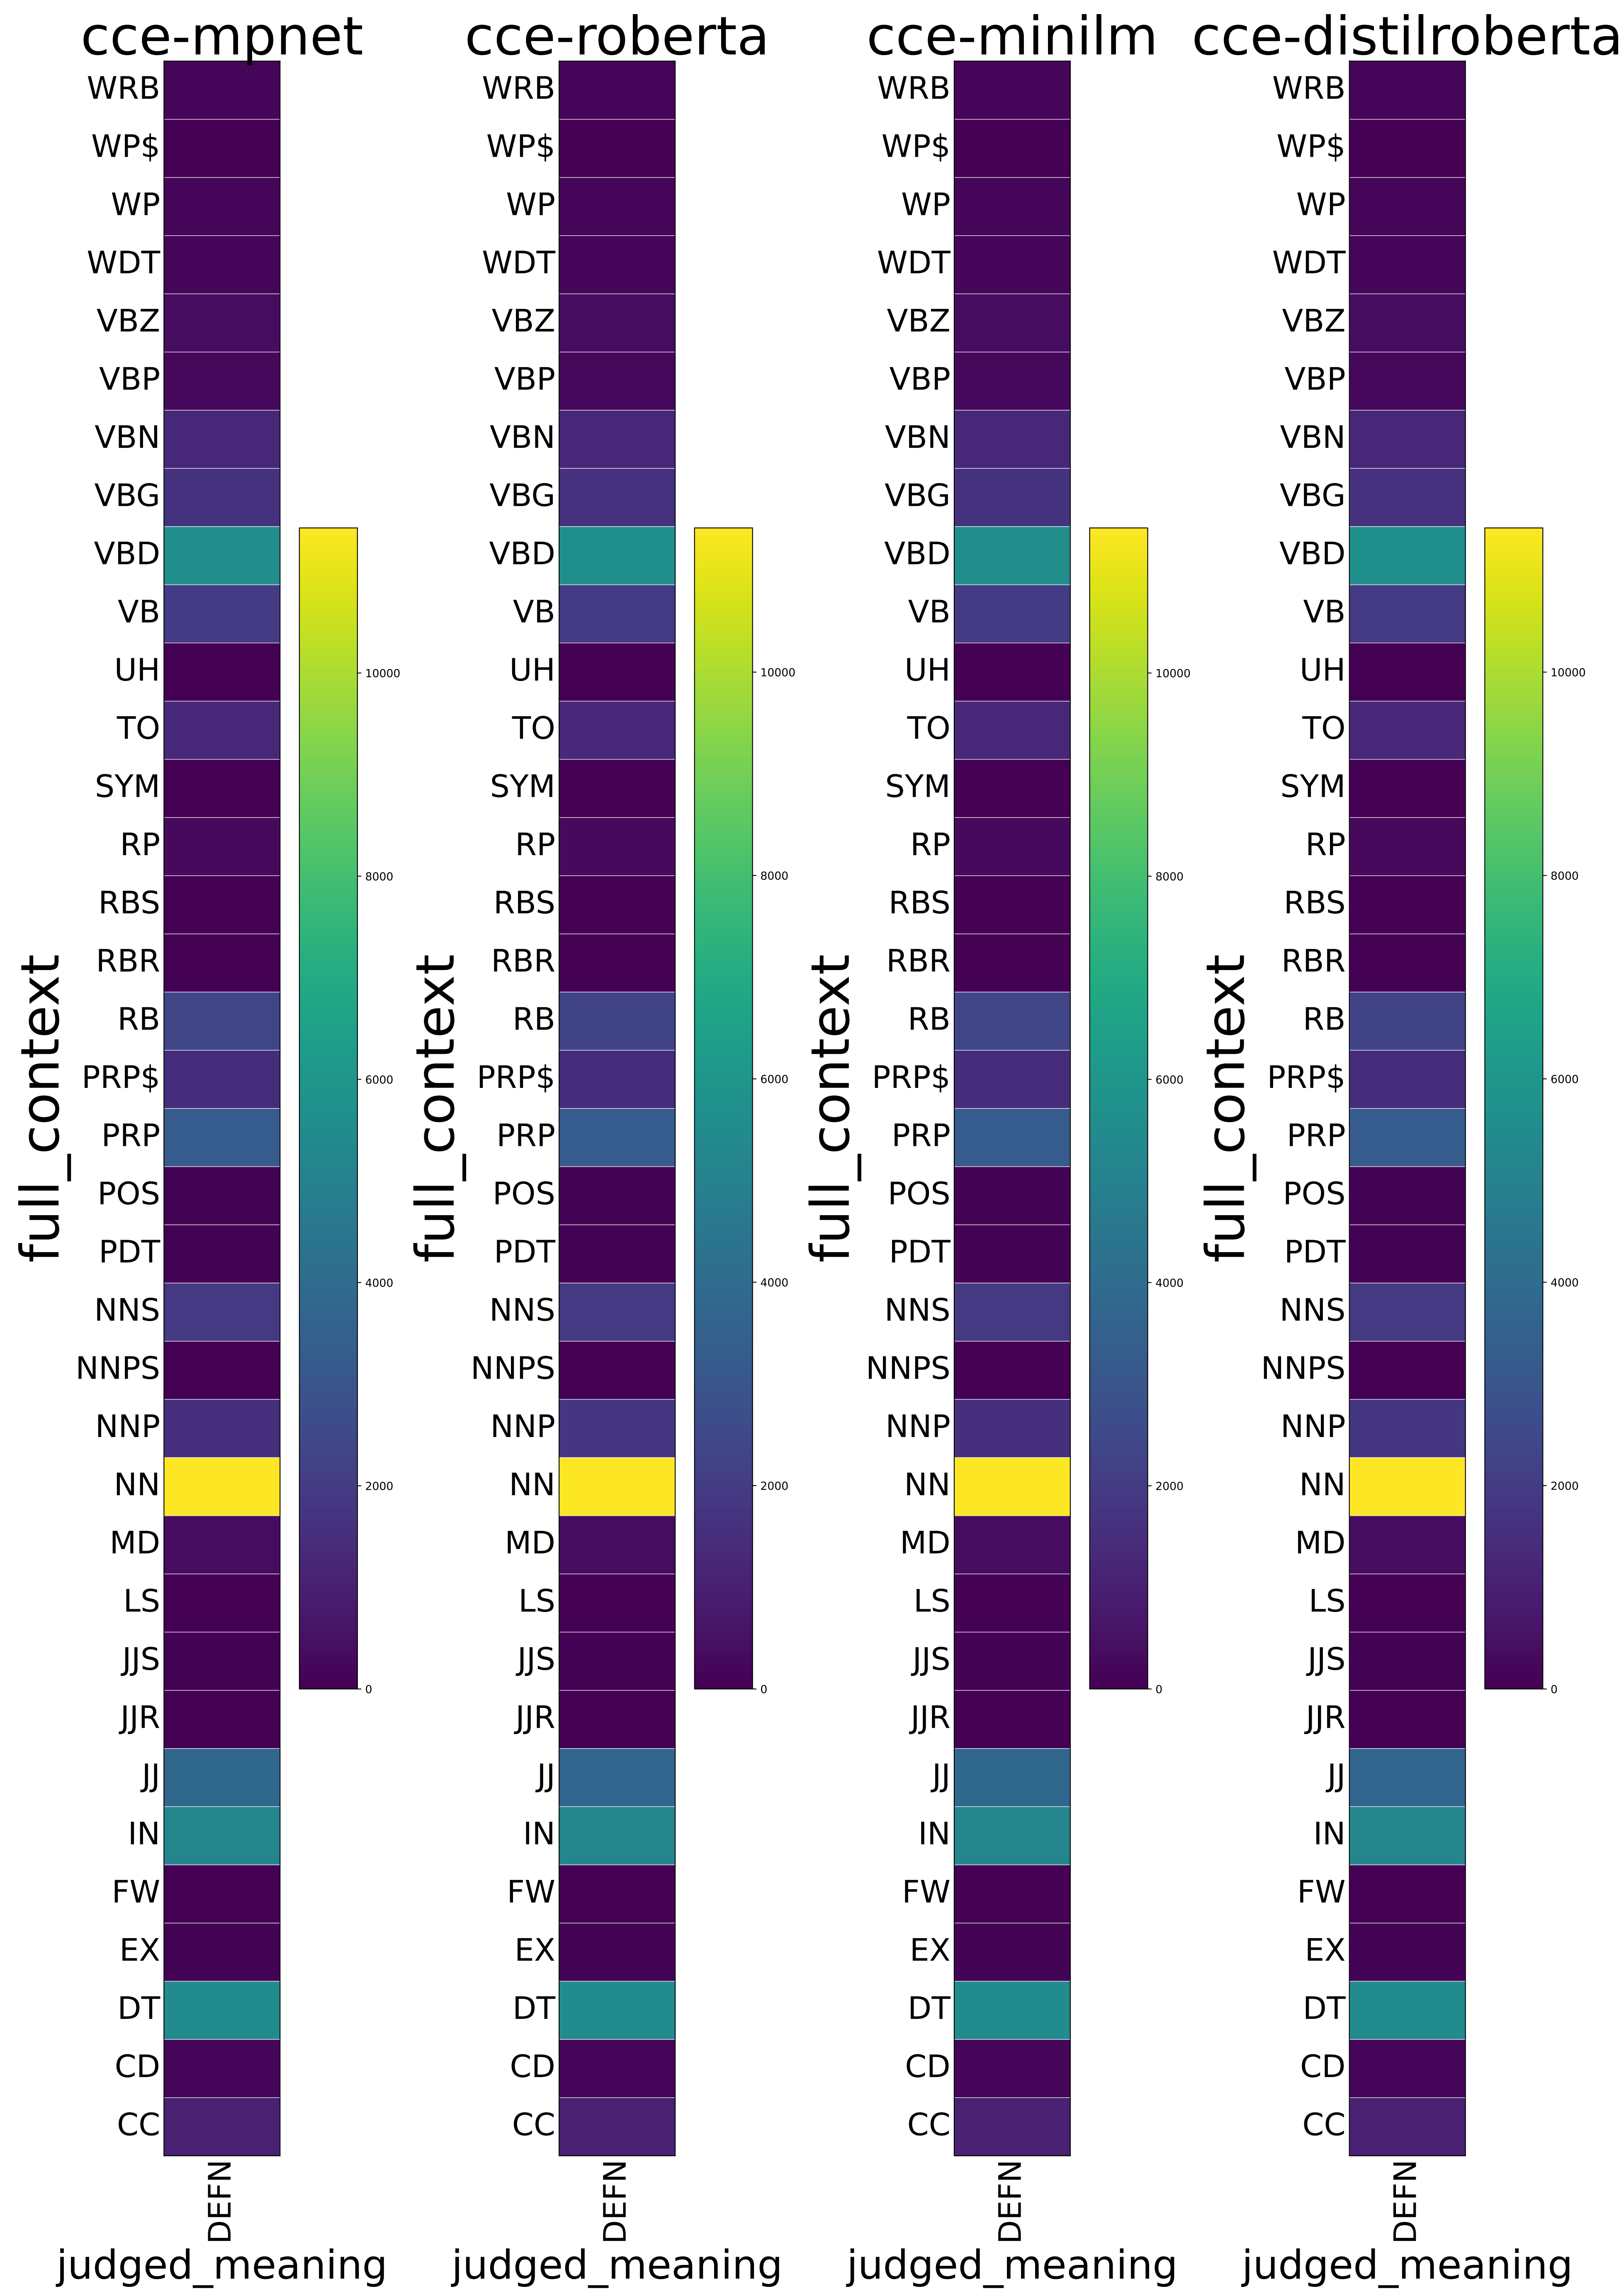

Supplement: SupplementaryMaterial [file cce_count_all.pdf › figures/cce_count_all.pdf]

# CV of <full\_context, judged\_meaning> Neutral Example Pairs

## Similarity Scores for CCE

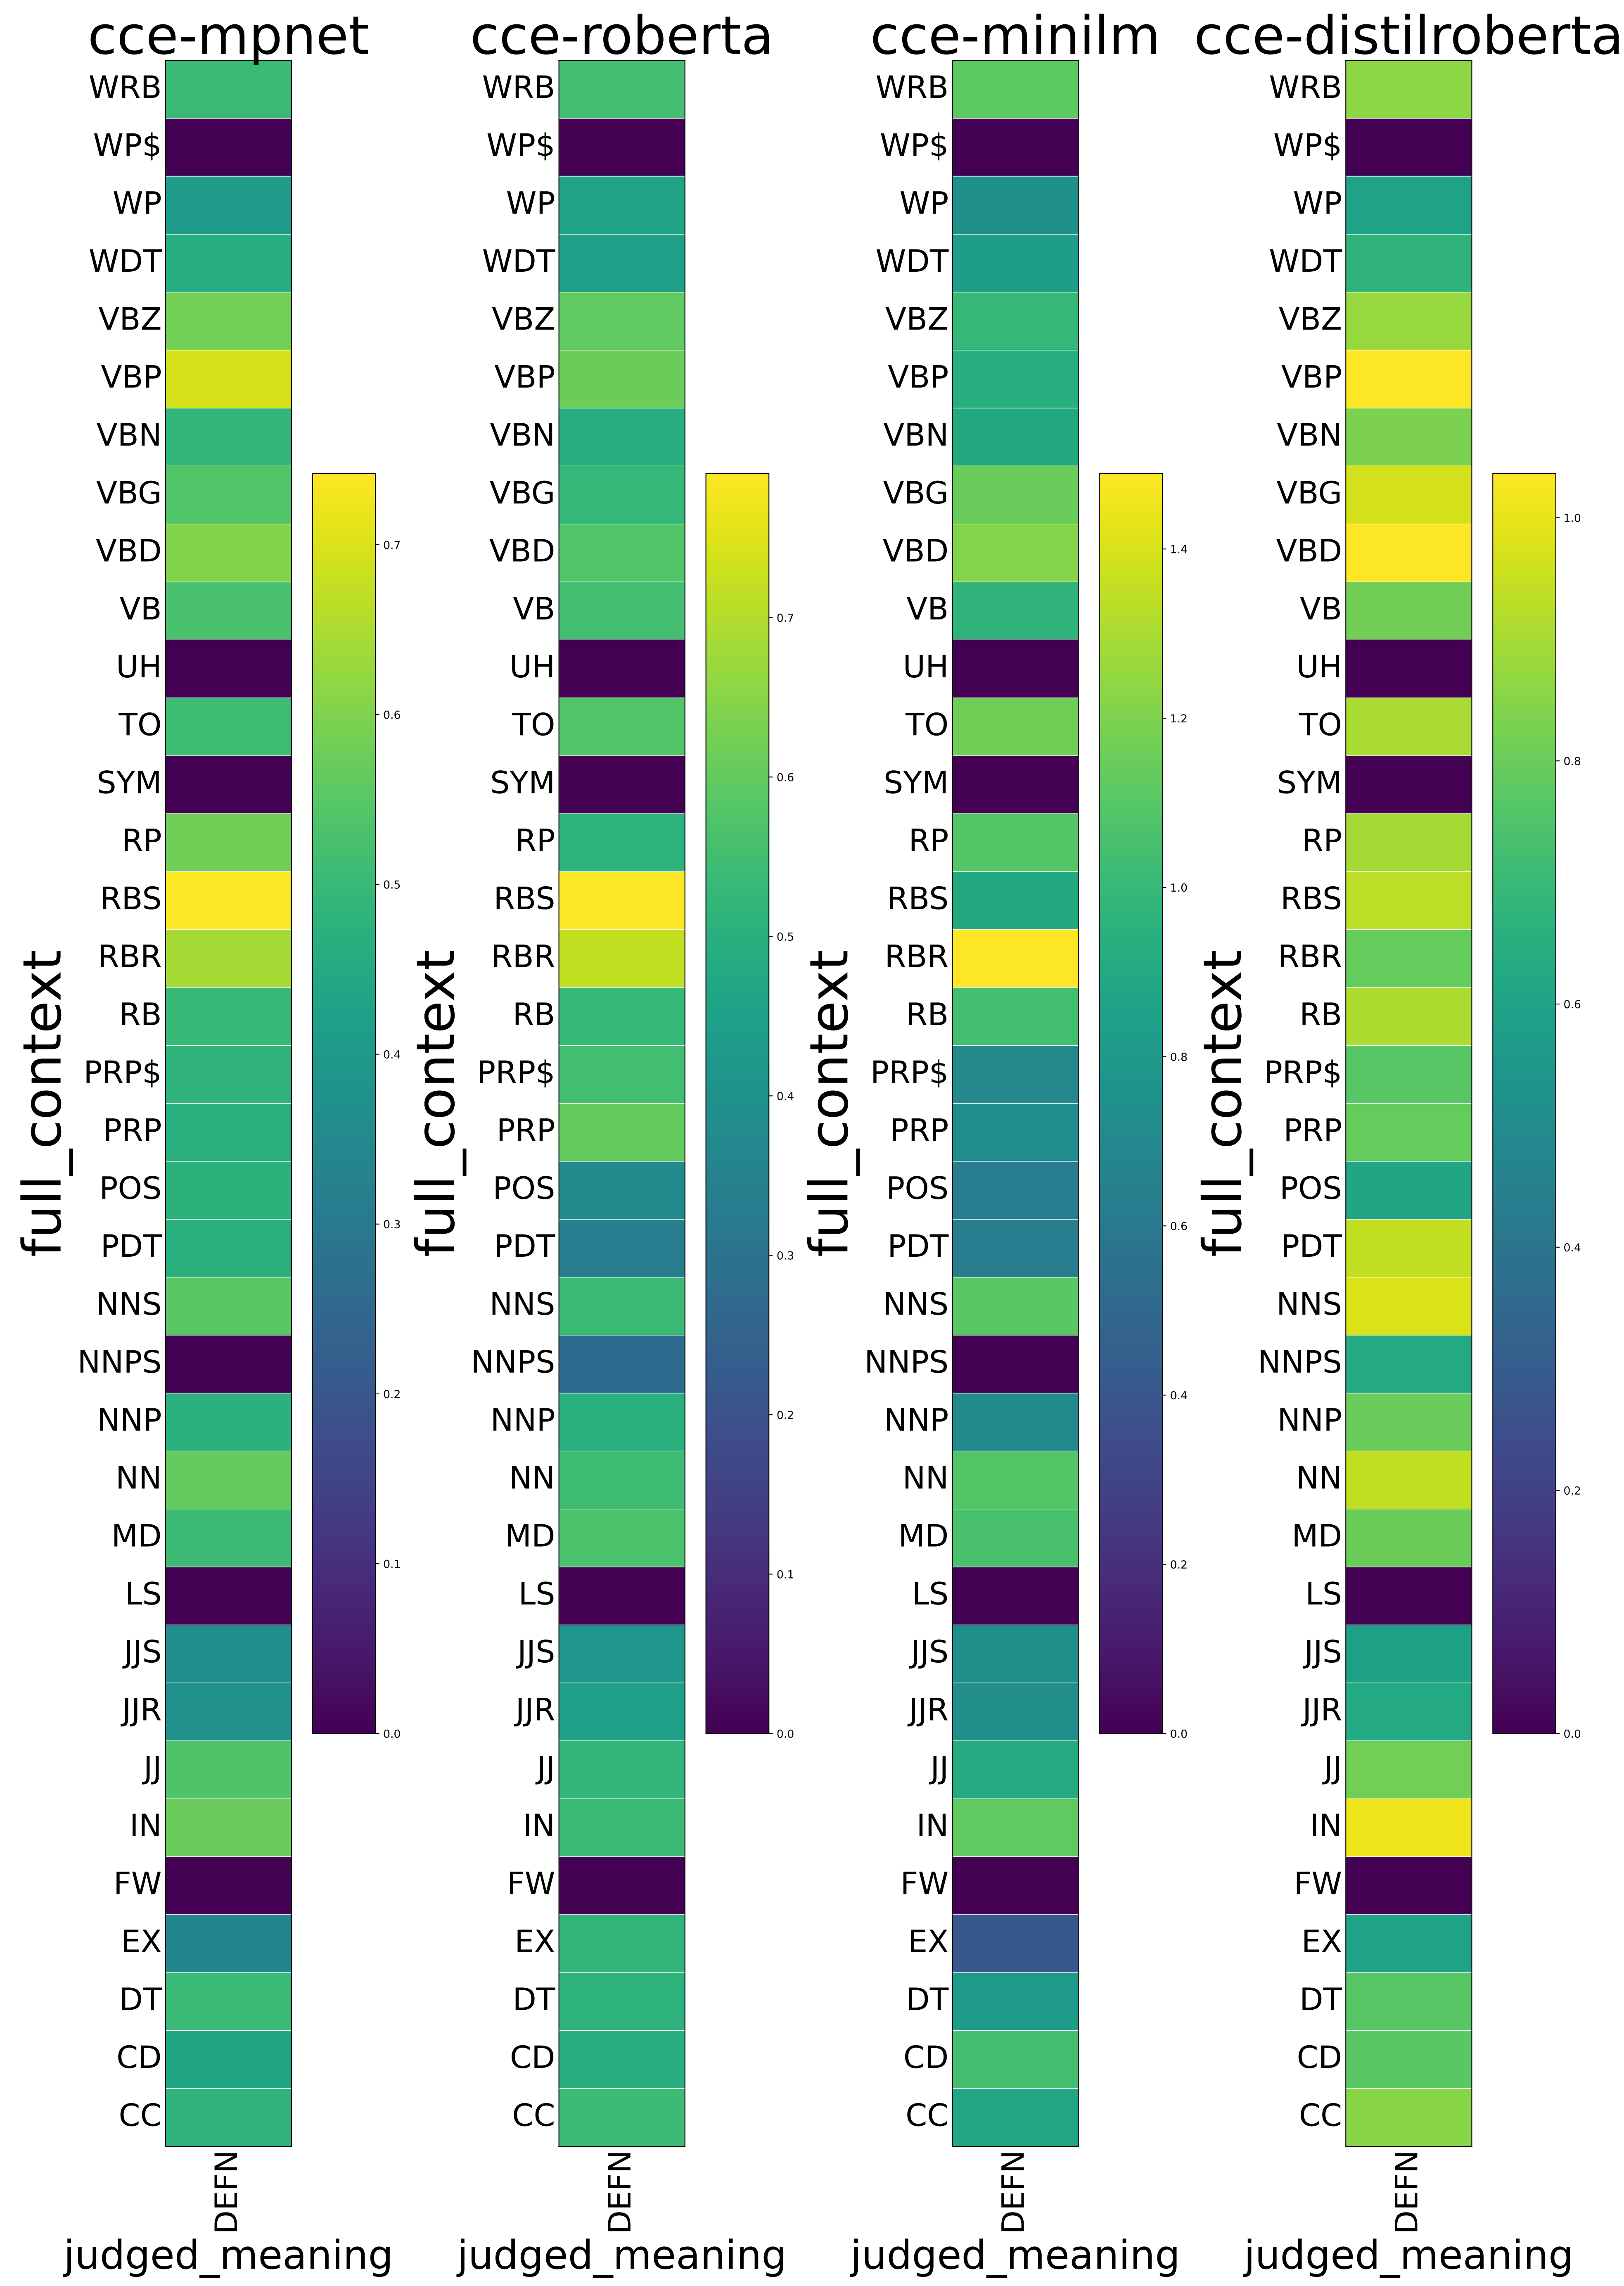

Supplement: SupplementaryMaterial [file cce_cv_neutral.pdf › figures/cce_cv_neutral.pdf]

# CV of <full\_context, judged\_meaning> Positive Example Pairs

## Similarity Scores for CCE

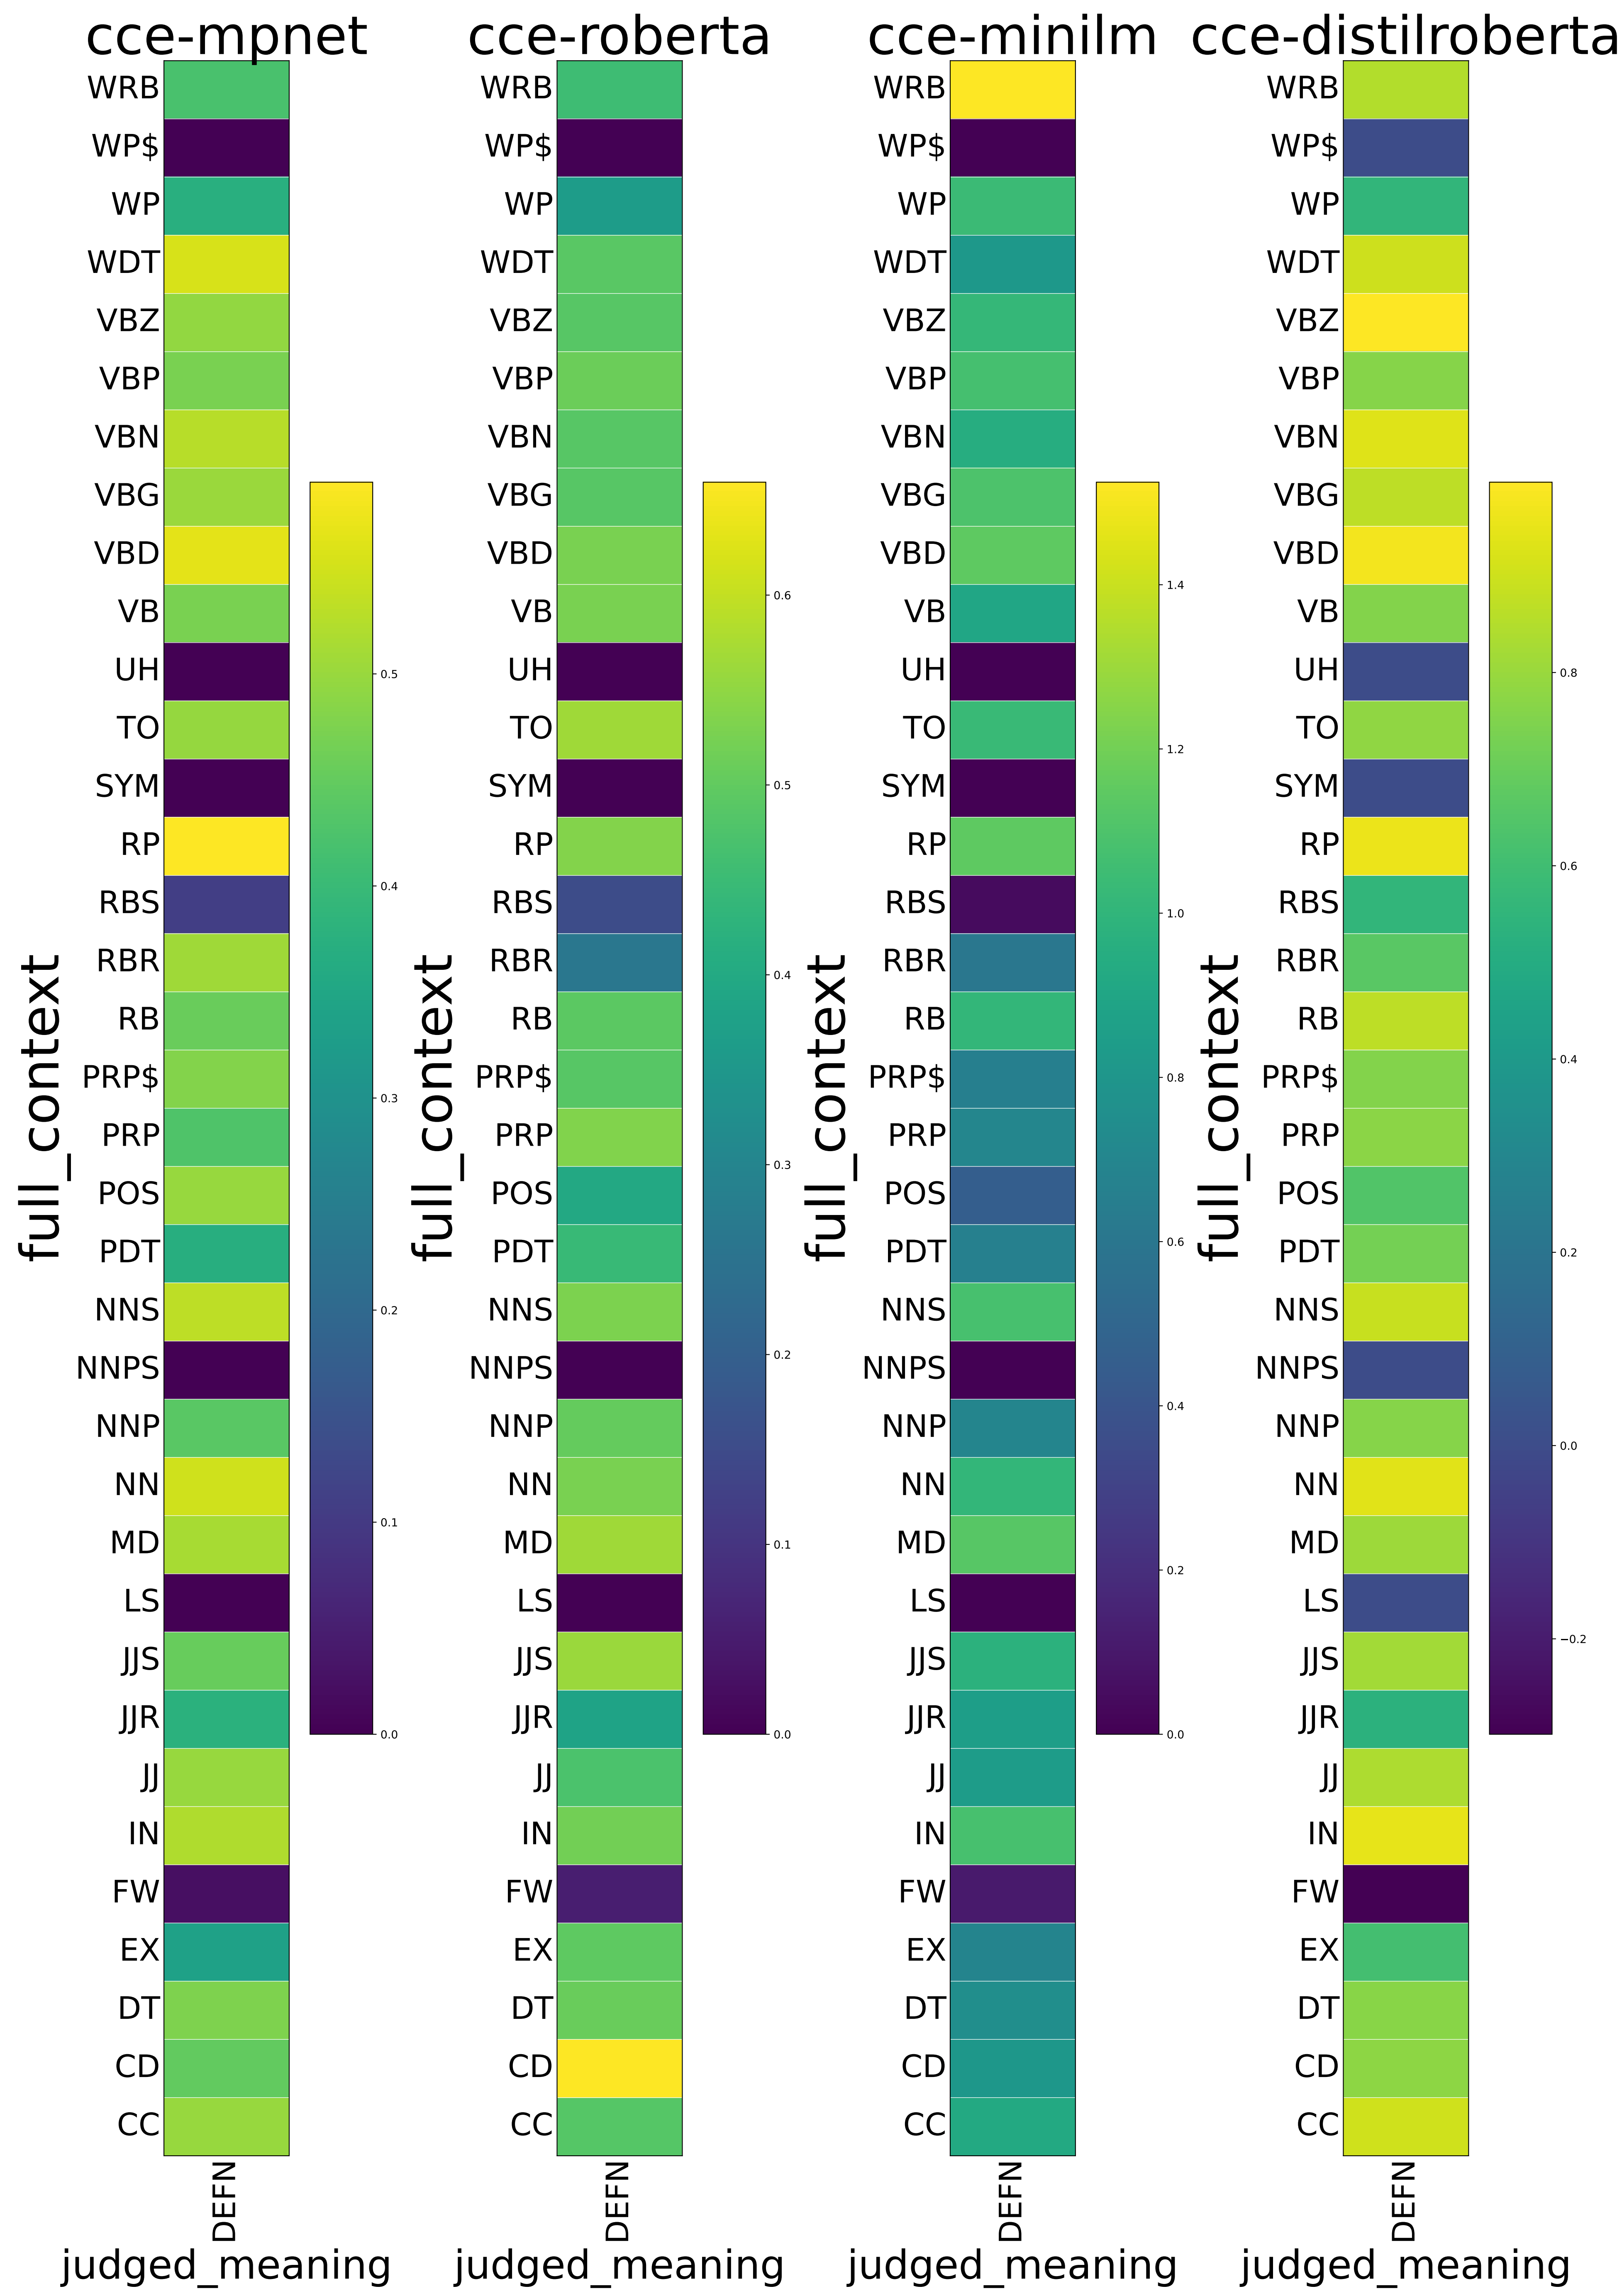

Supplement: SupplementaryMaterial [file cce_cv_positive.pdf › figures/cce_cv_positive.pdf]

# Mean of <full\_context, judged\_meaning> All Example Pairs

## Similarity Scores for CCE

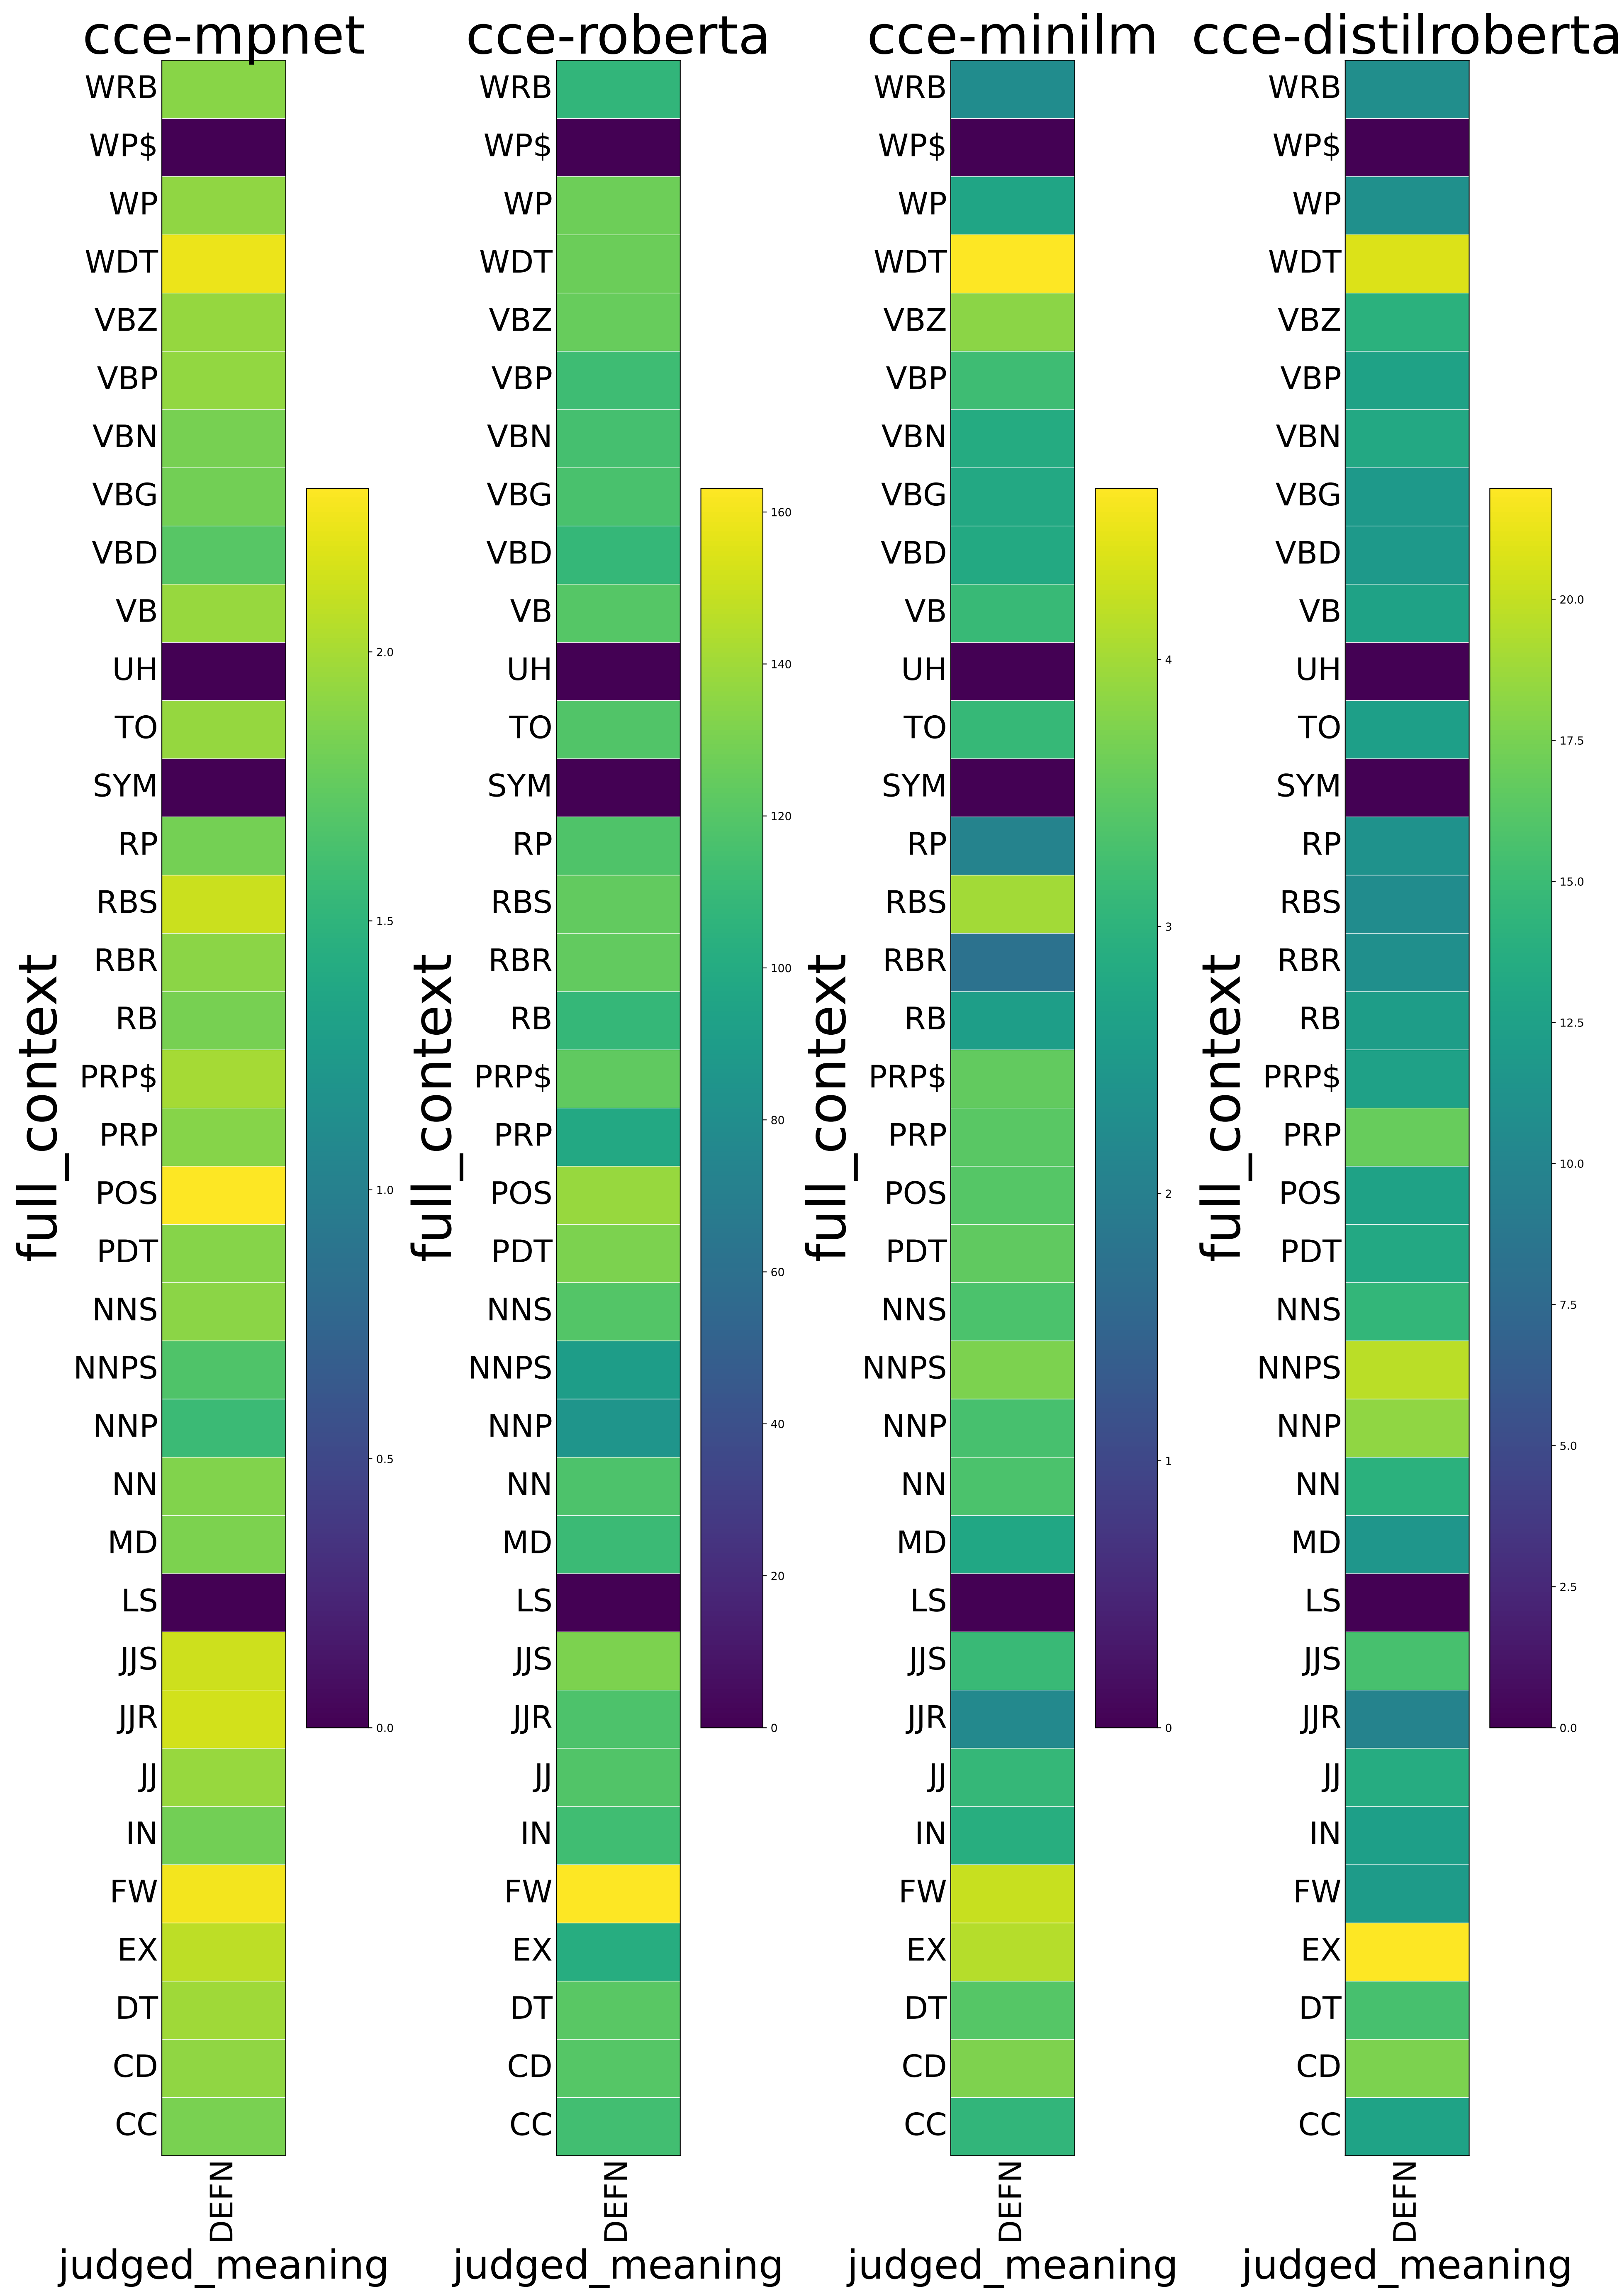

Supplement: SupplementaryMaterial [file cce_mean_all.pdf › figures/cce_mean_all.pdf]

# Mean of <full\_context, judged\_meaning> Negative Example Pairs

## Similarity Scores for CCE

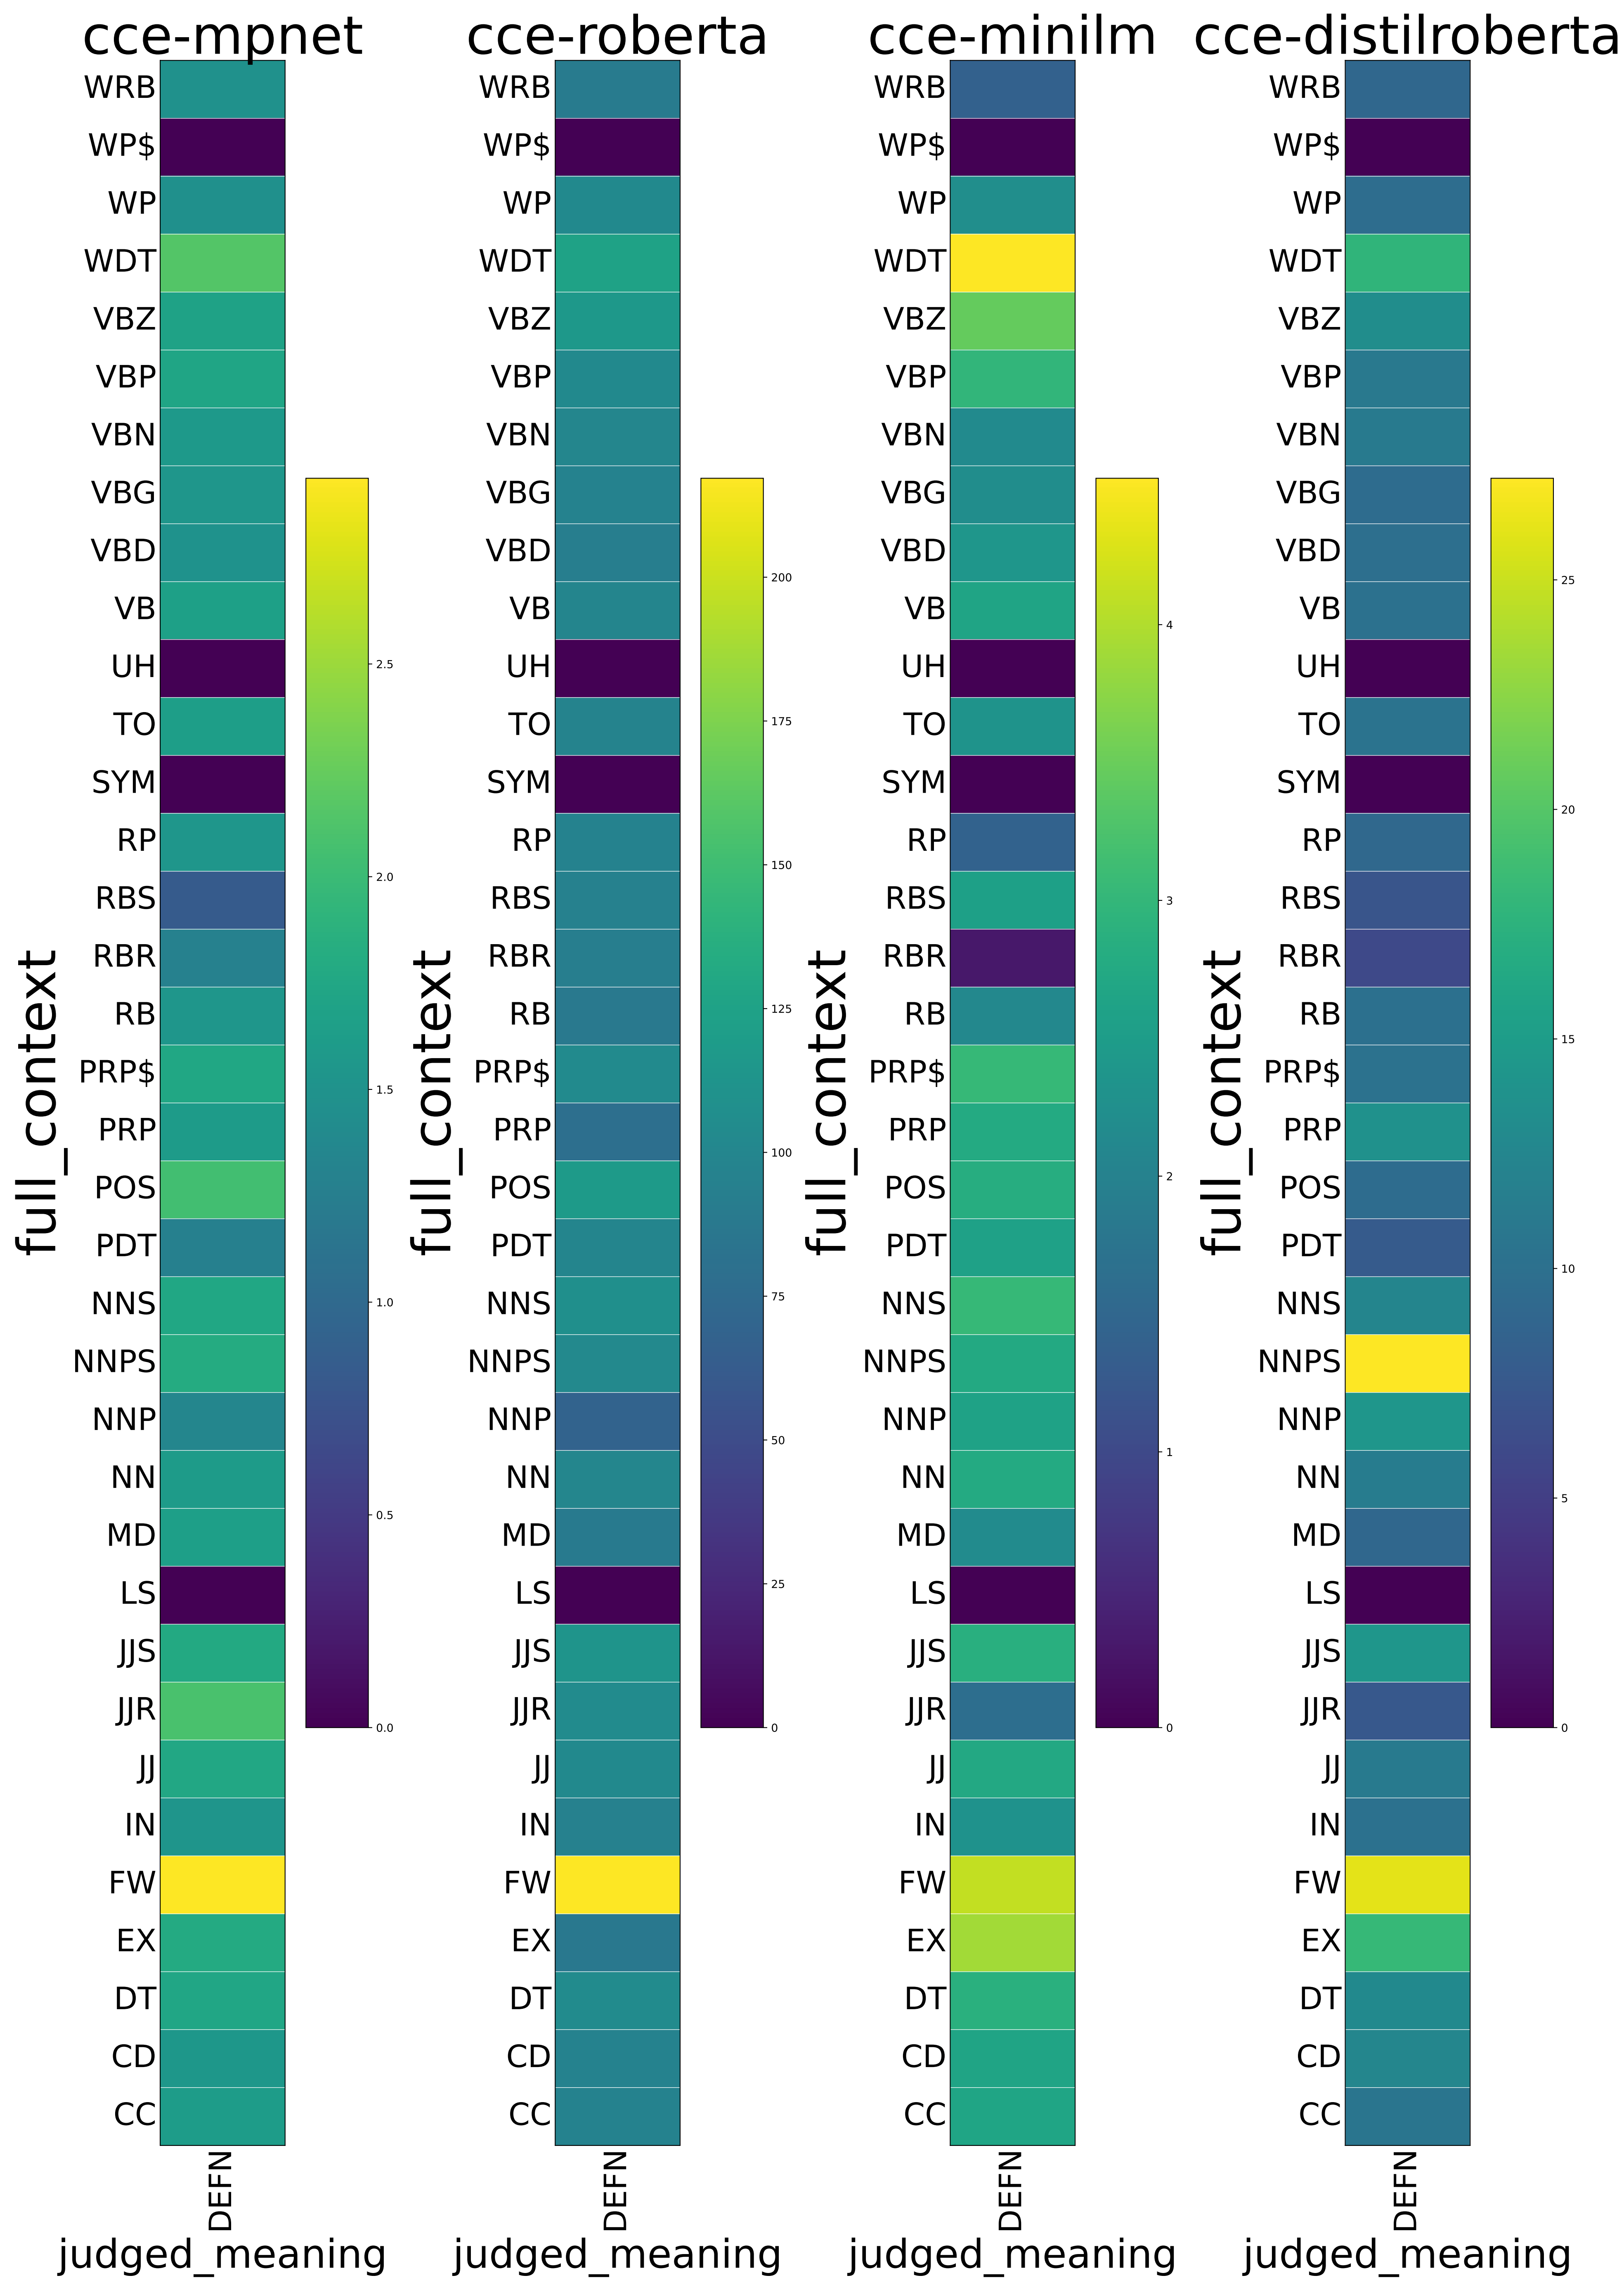

Supplement: SupplementaryMaterial [file cce_mean_negative.pdf › figures/cce_mean_negative.pdf]

# Mean of <full\_context, judged\_meaning> Neutral Example Pairs

## Similarity Scores for CCE

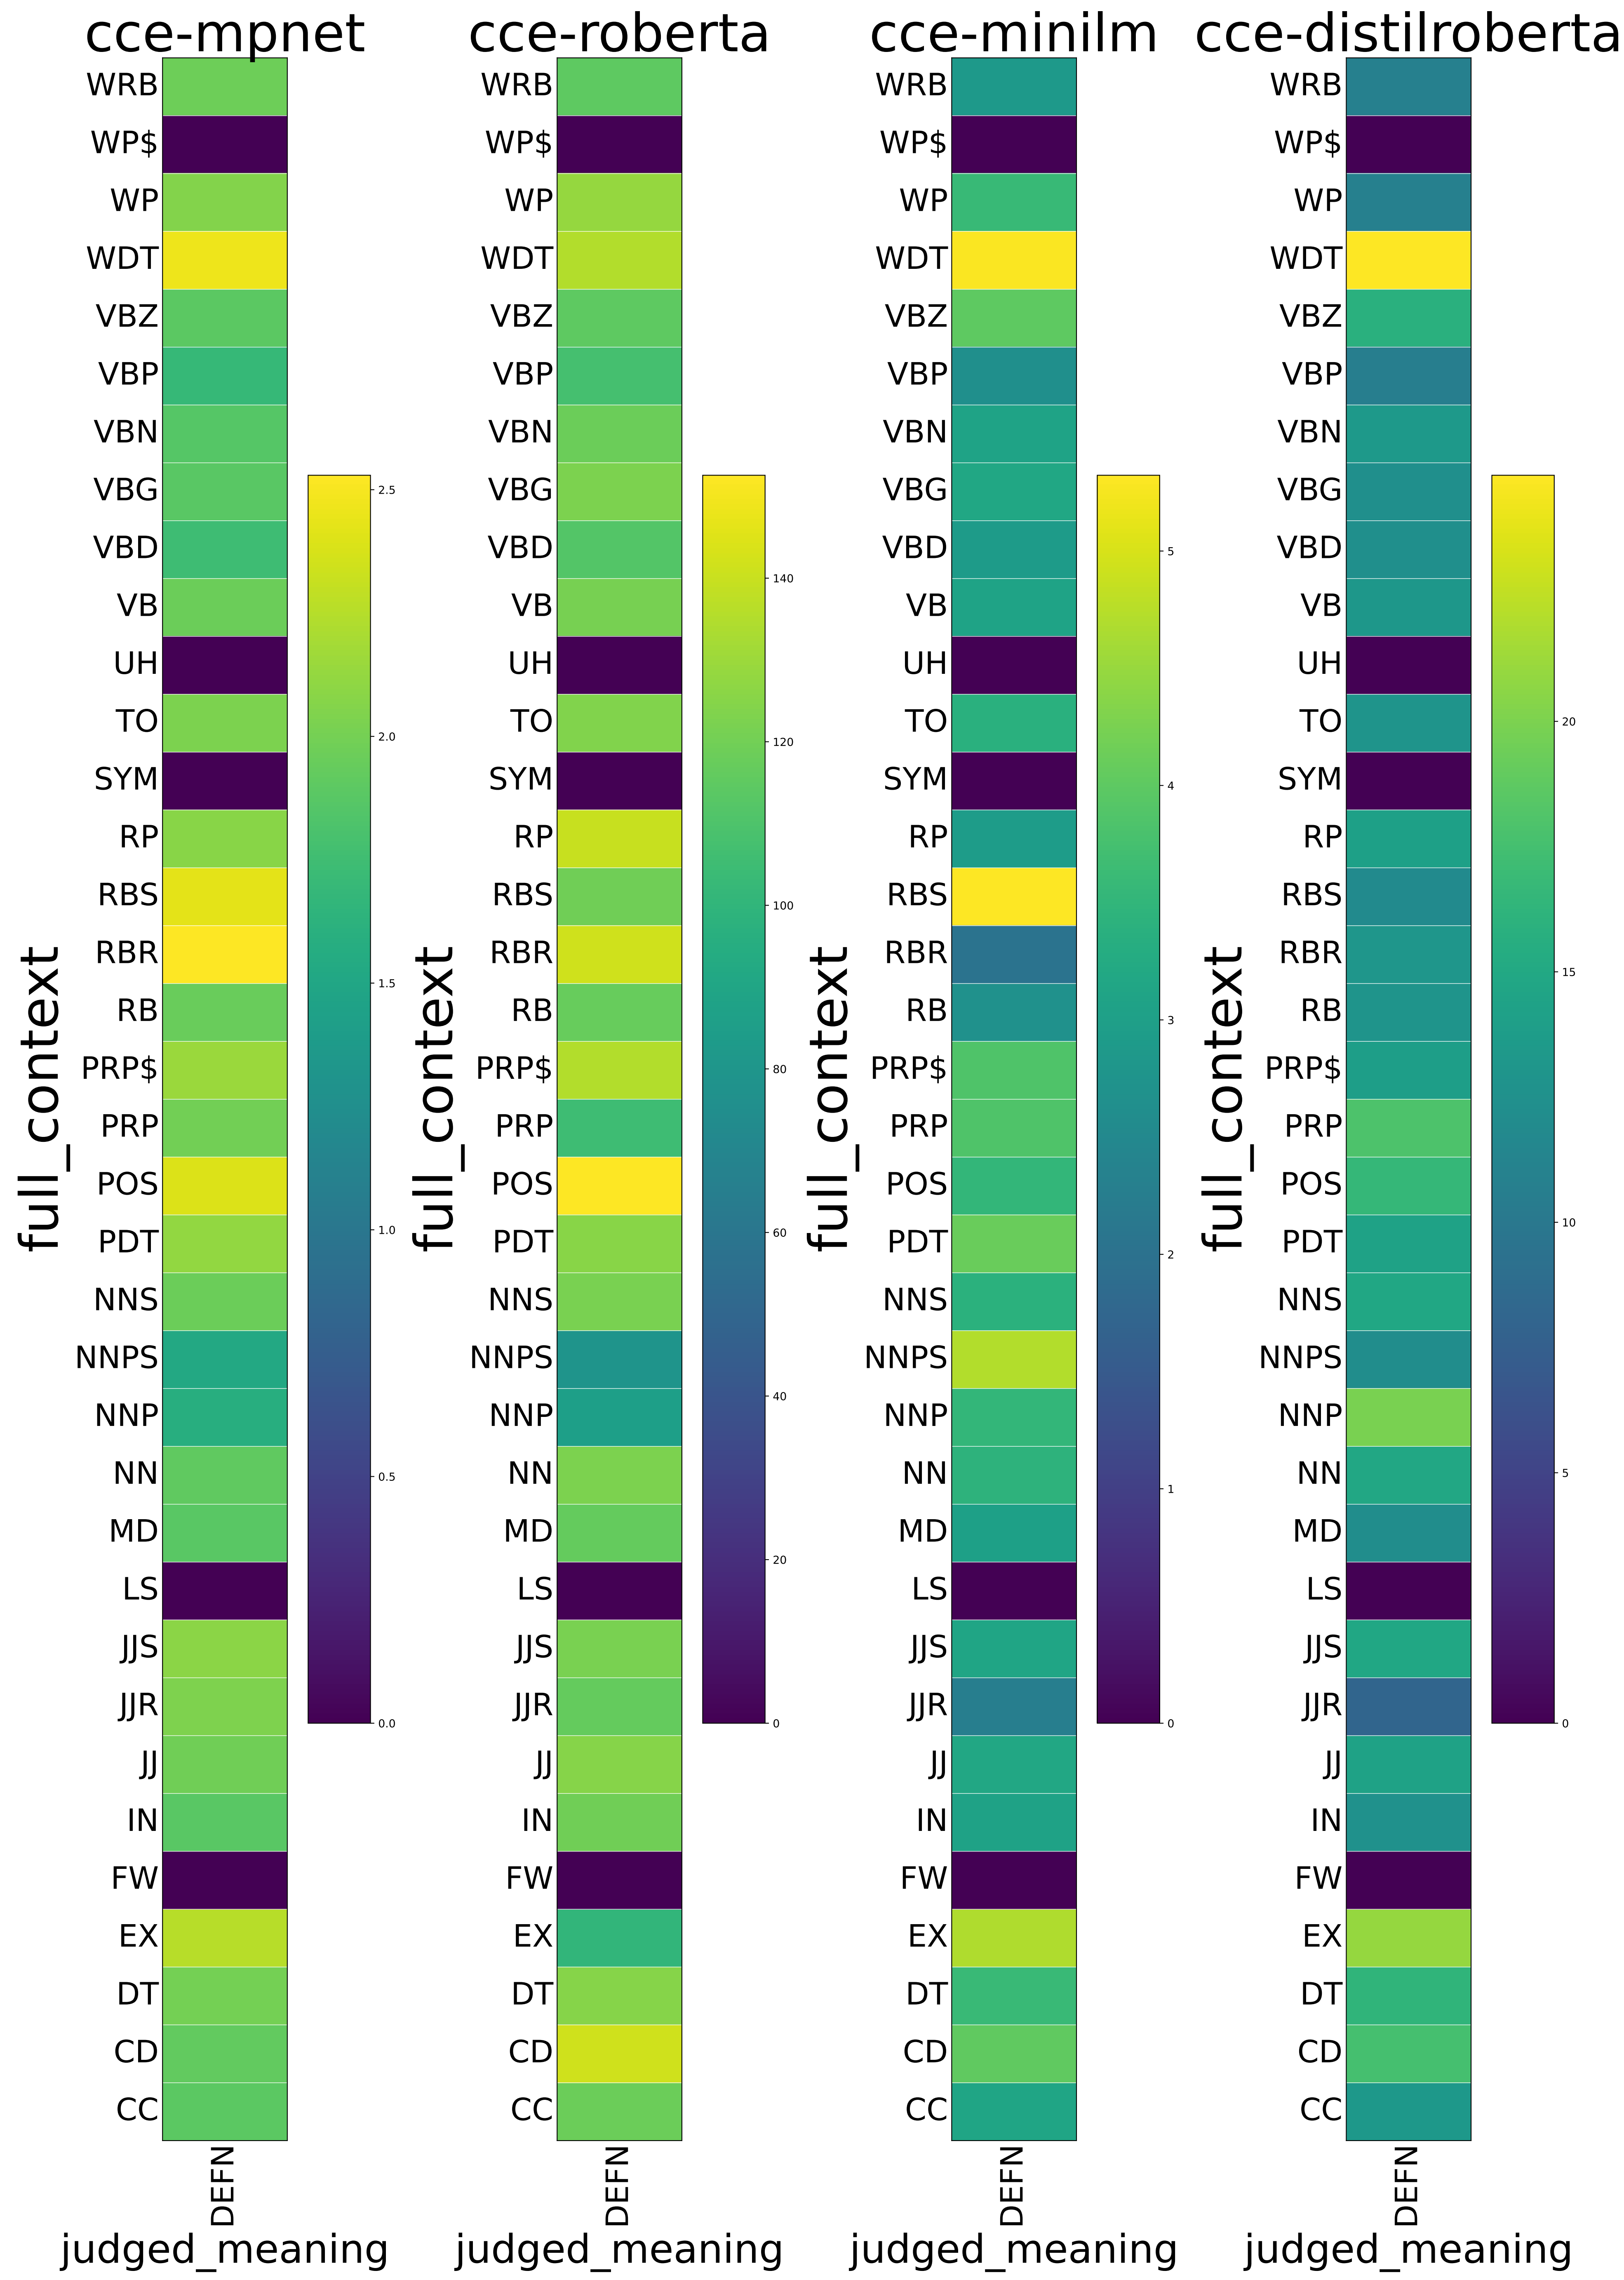

Supplement: SupplementaryMaterial [file cce_mean_neutral.pdf › figures/cce_mean_neutral.pdf]

# Mean of <full\_context, judged\_meaning> Positive Example Pairs

## Similarity Scores for CCE

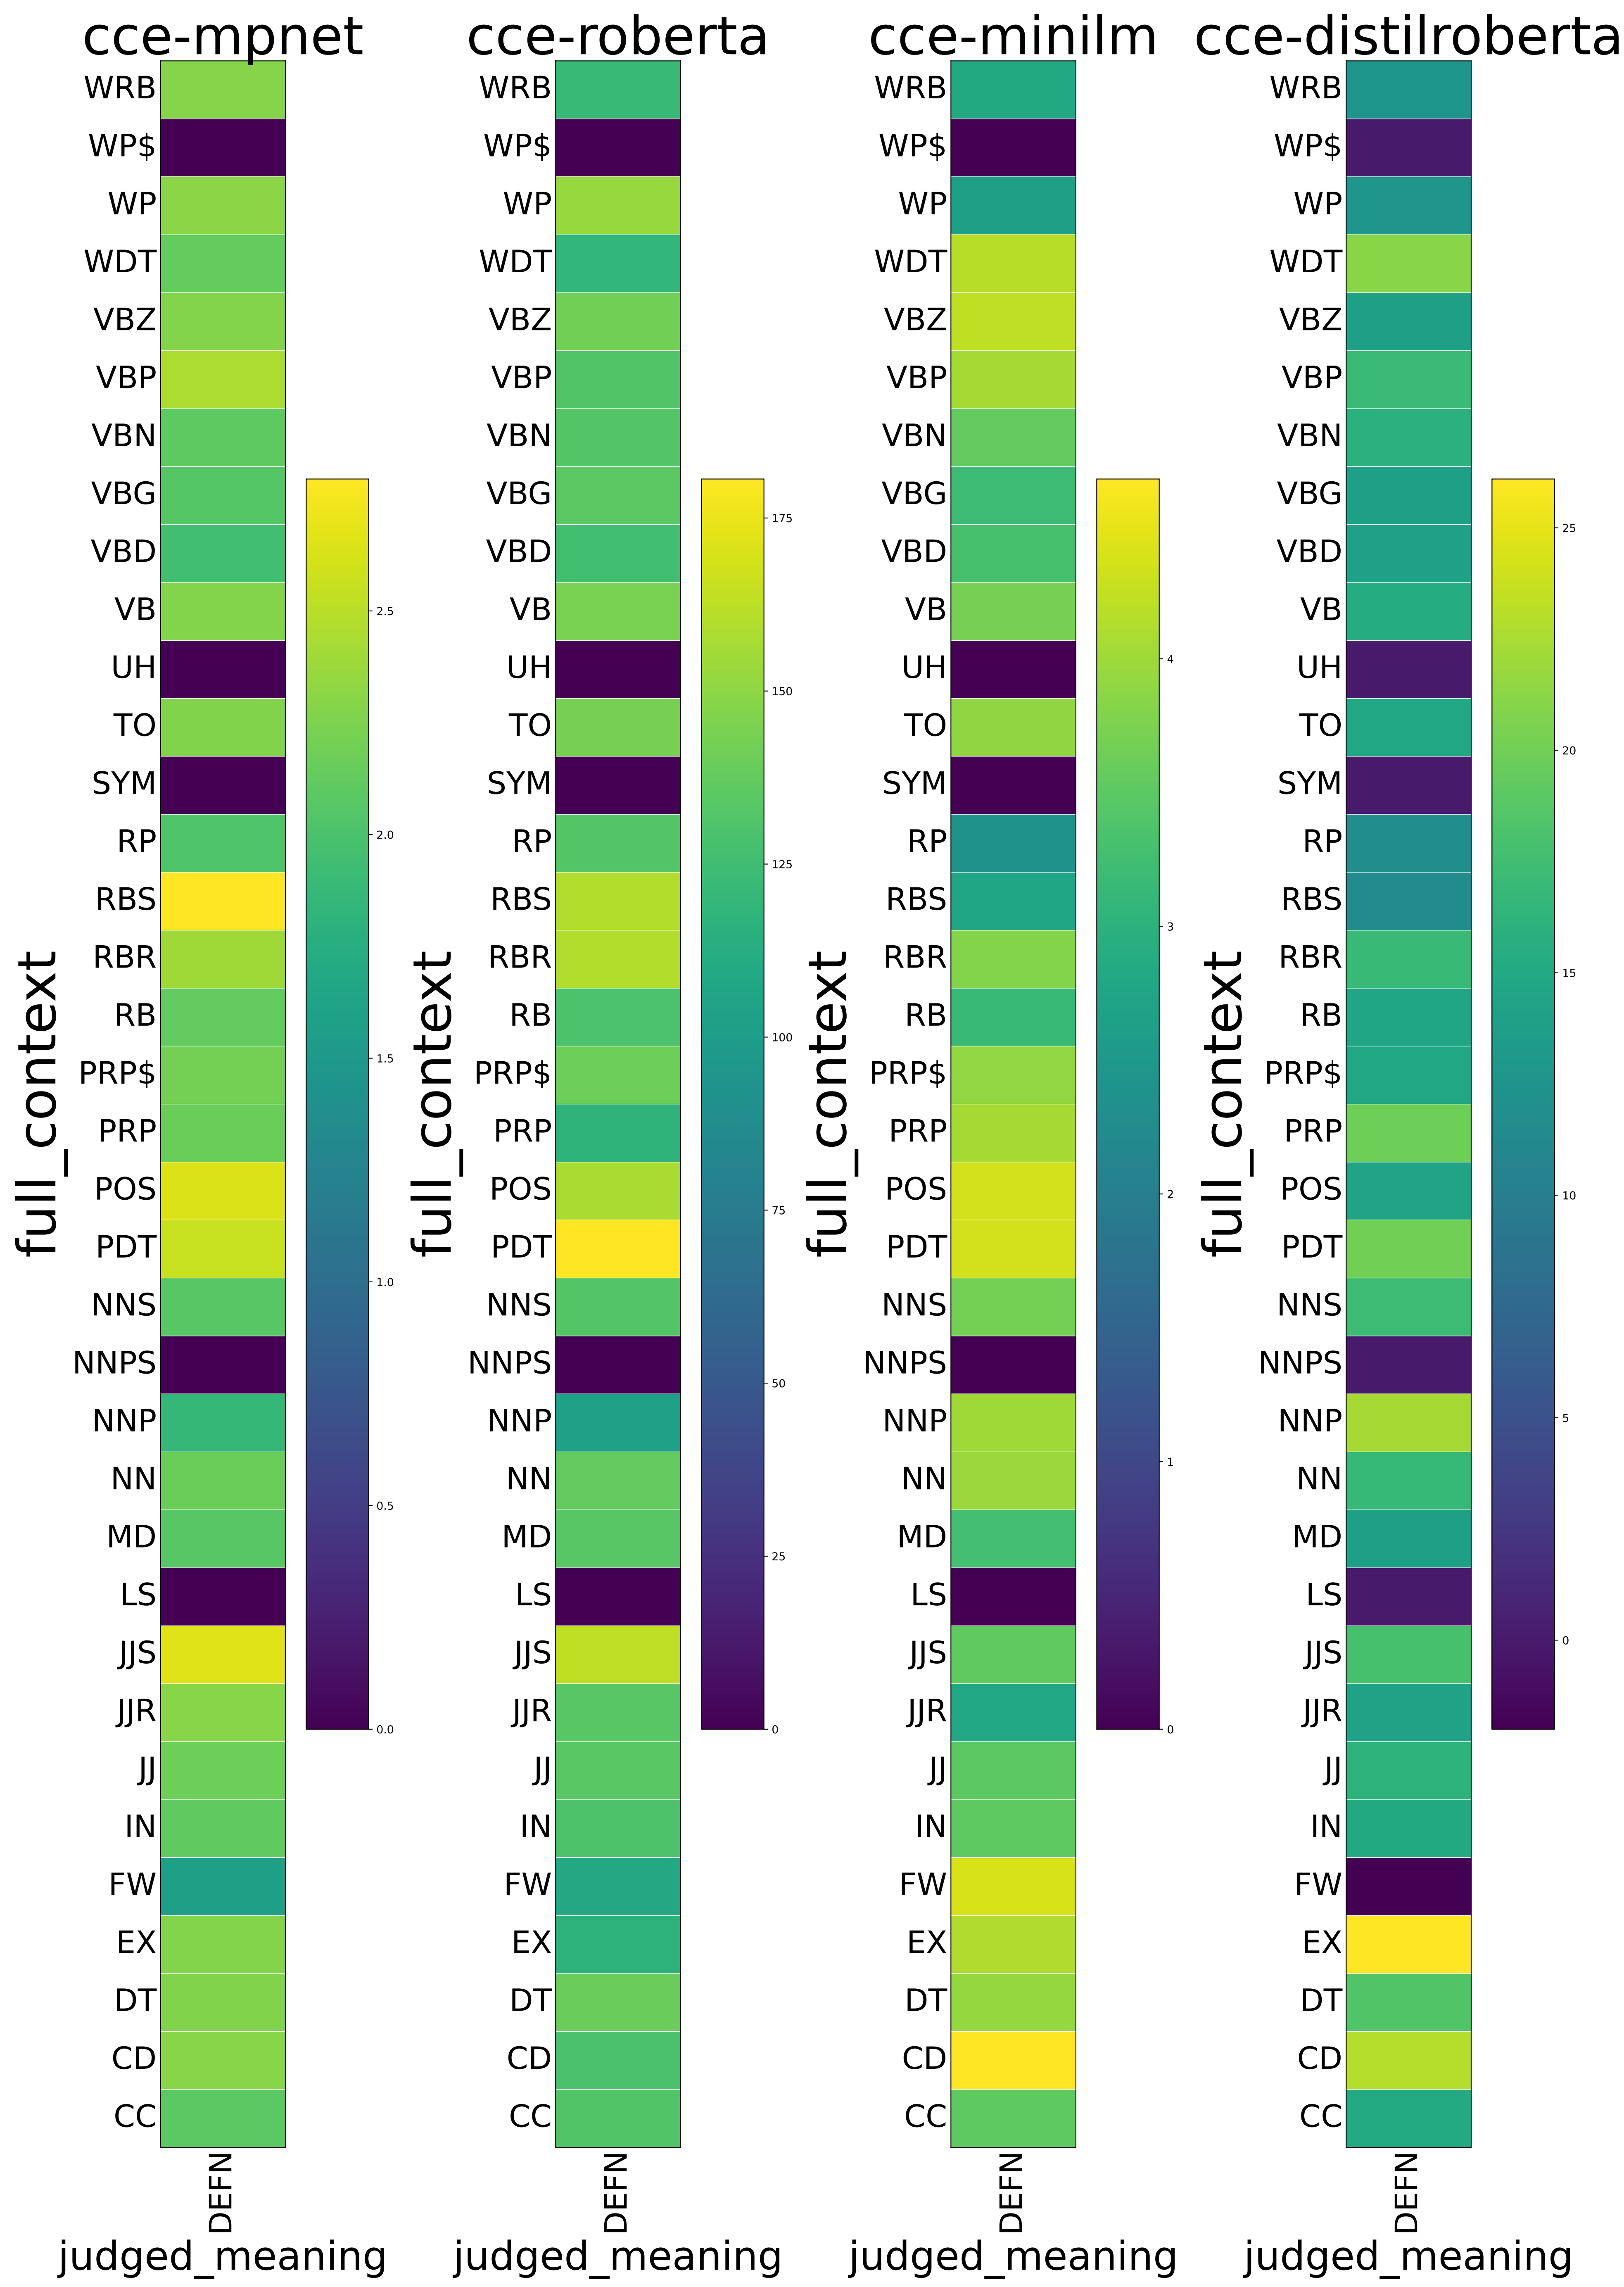

Supplement: SupplementaryMaterial [file cce_mean_positive.pdf › figures/cce_mean_positive.pdf]

CV of <full\_context, judged\_meaning> All Example Pairs  
Similarity Scores for DXA

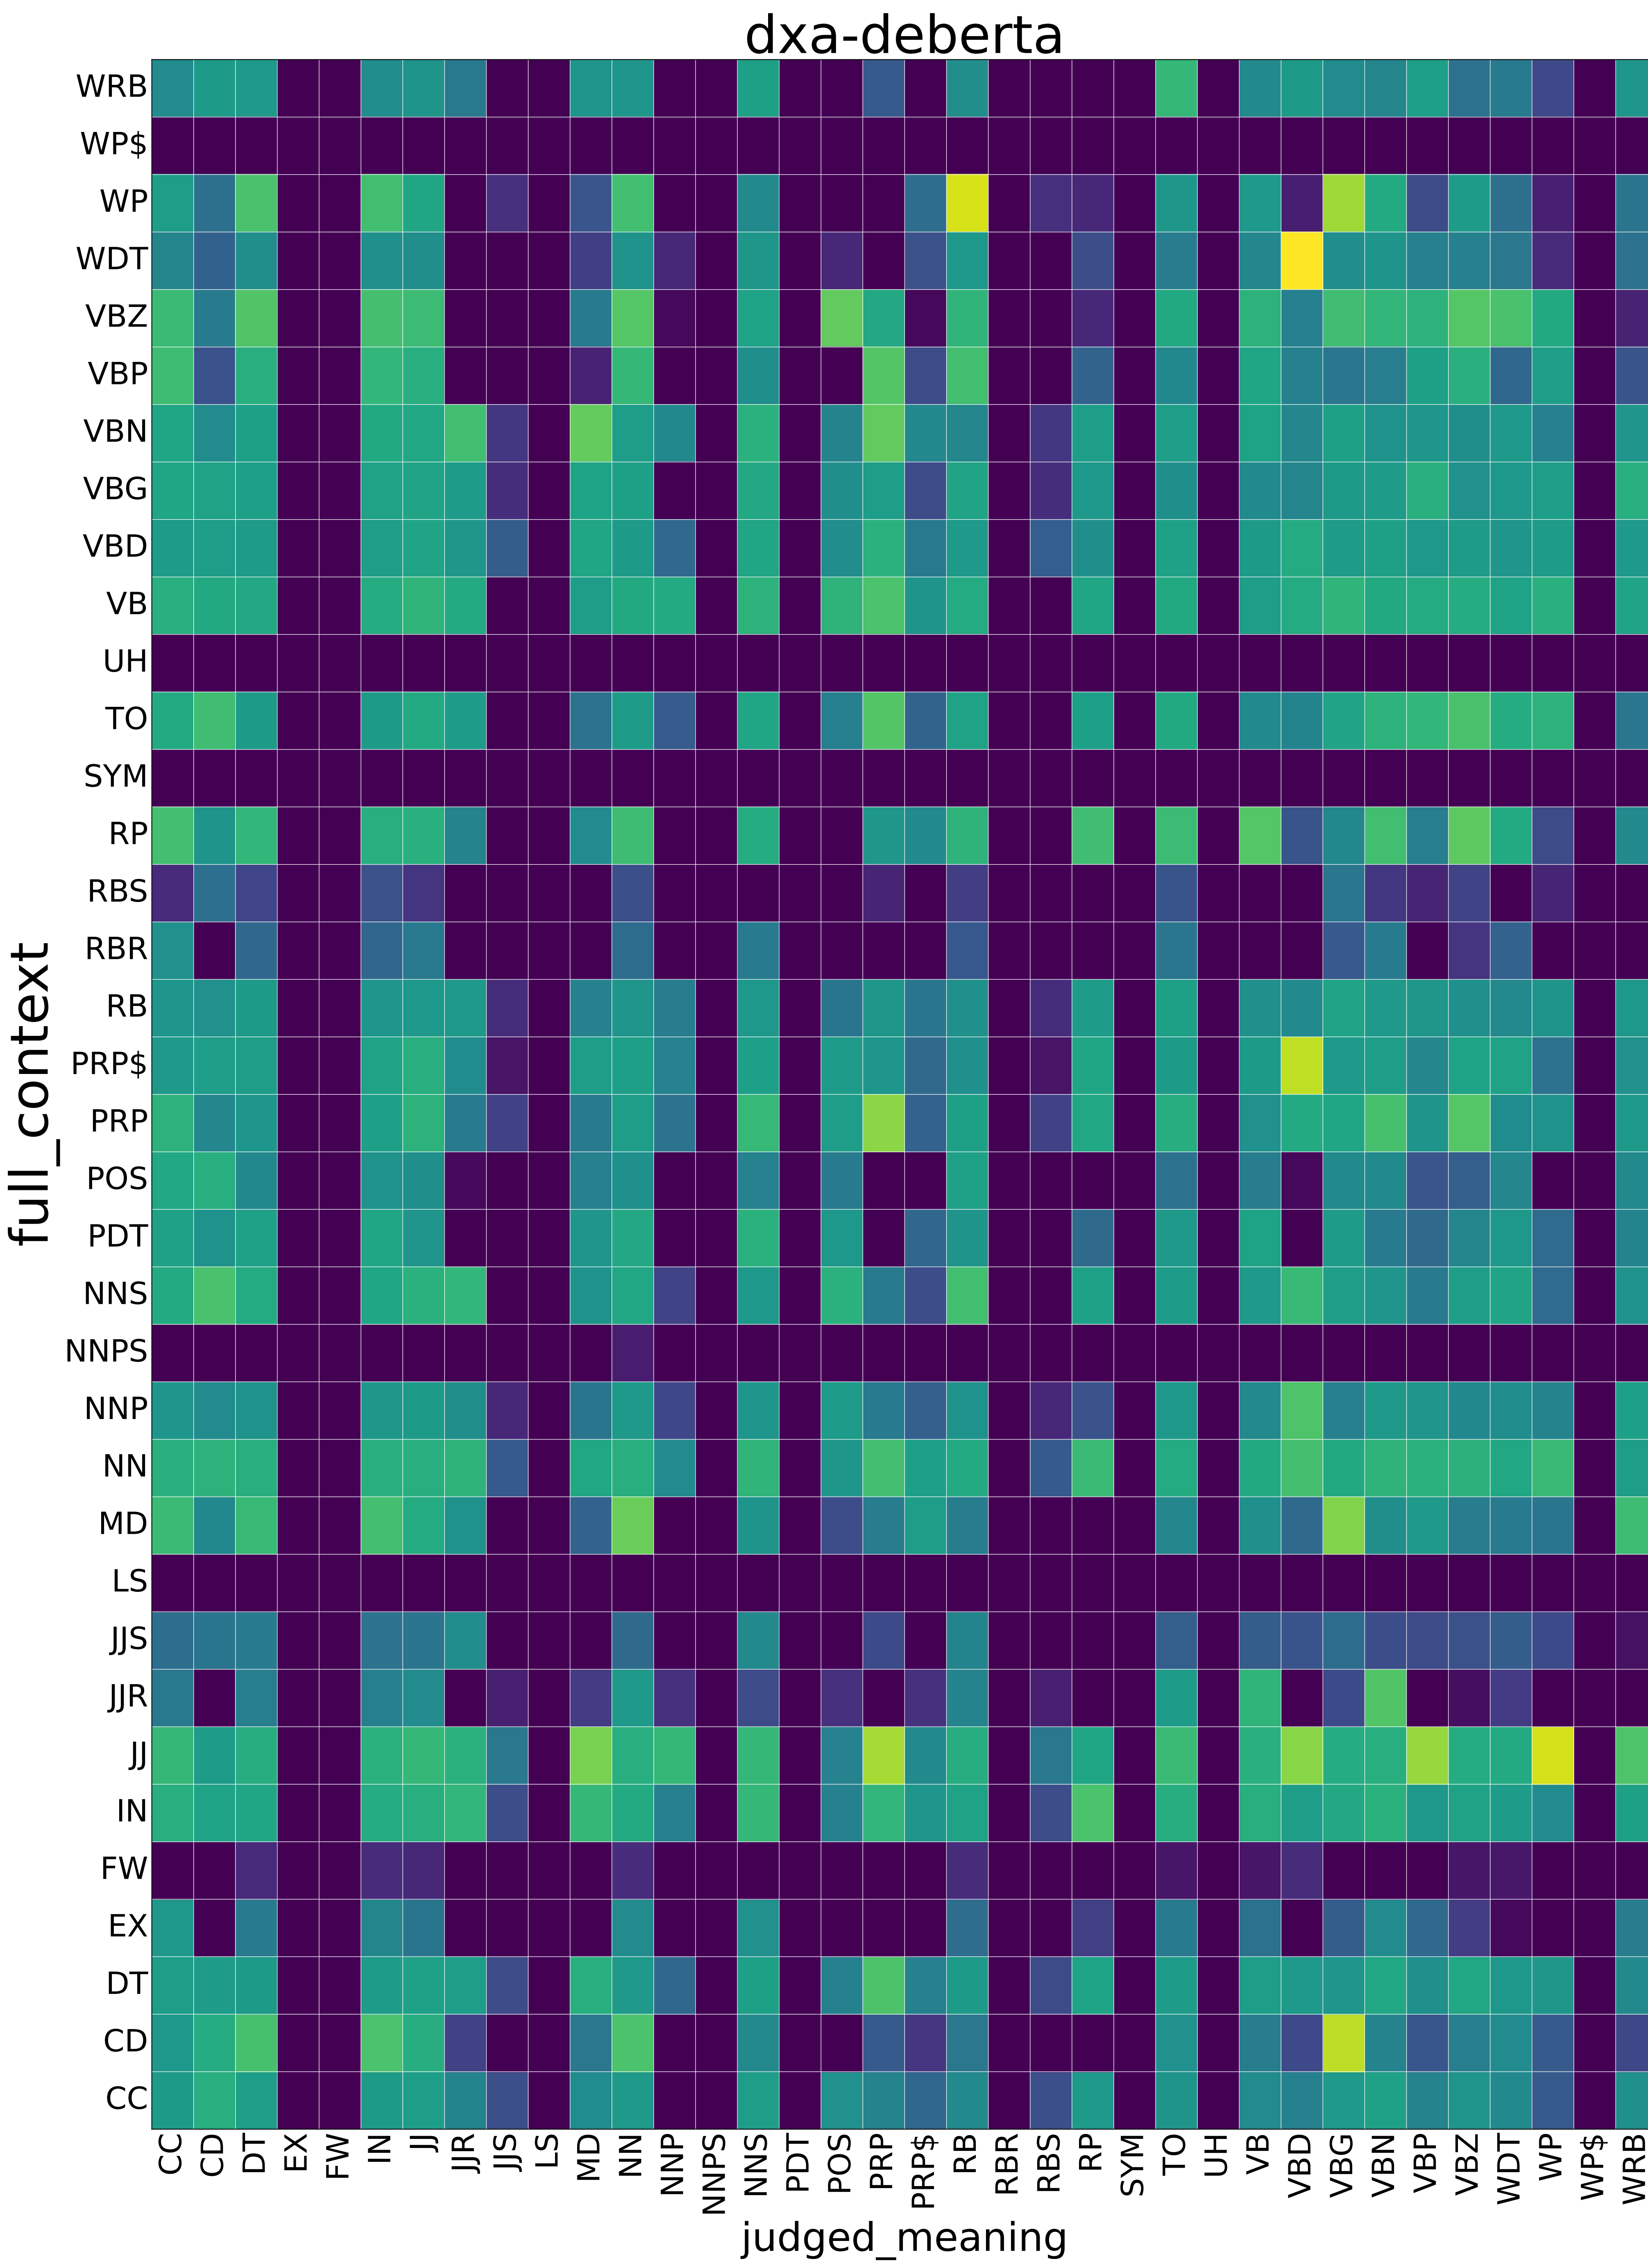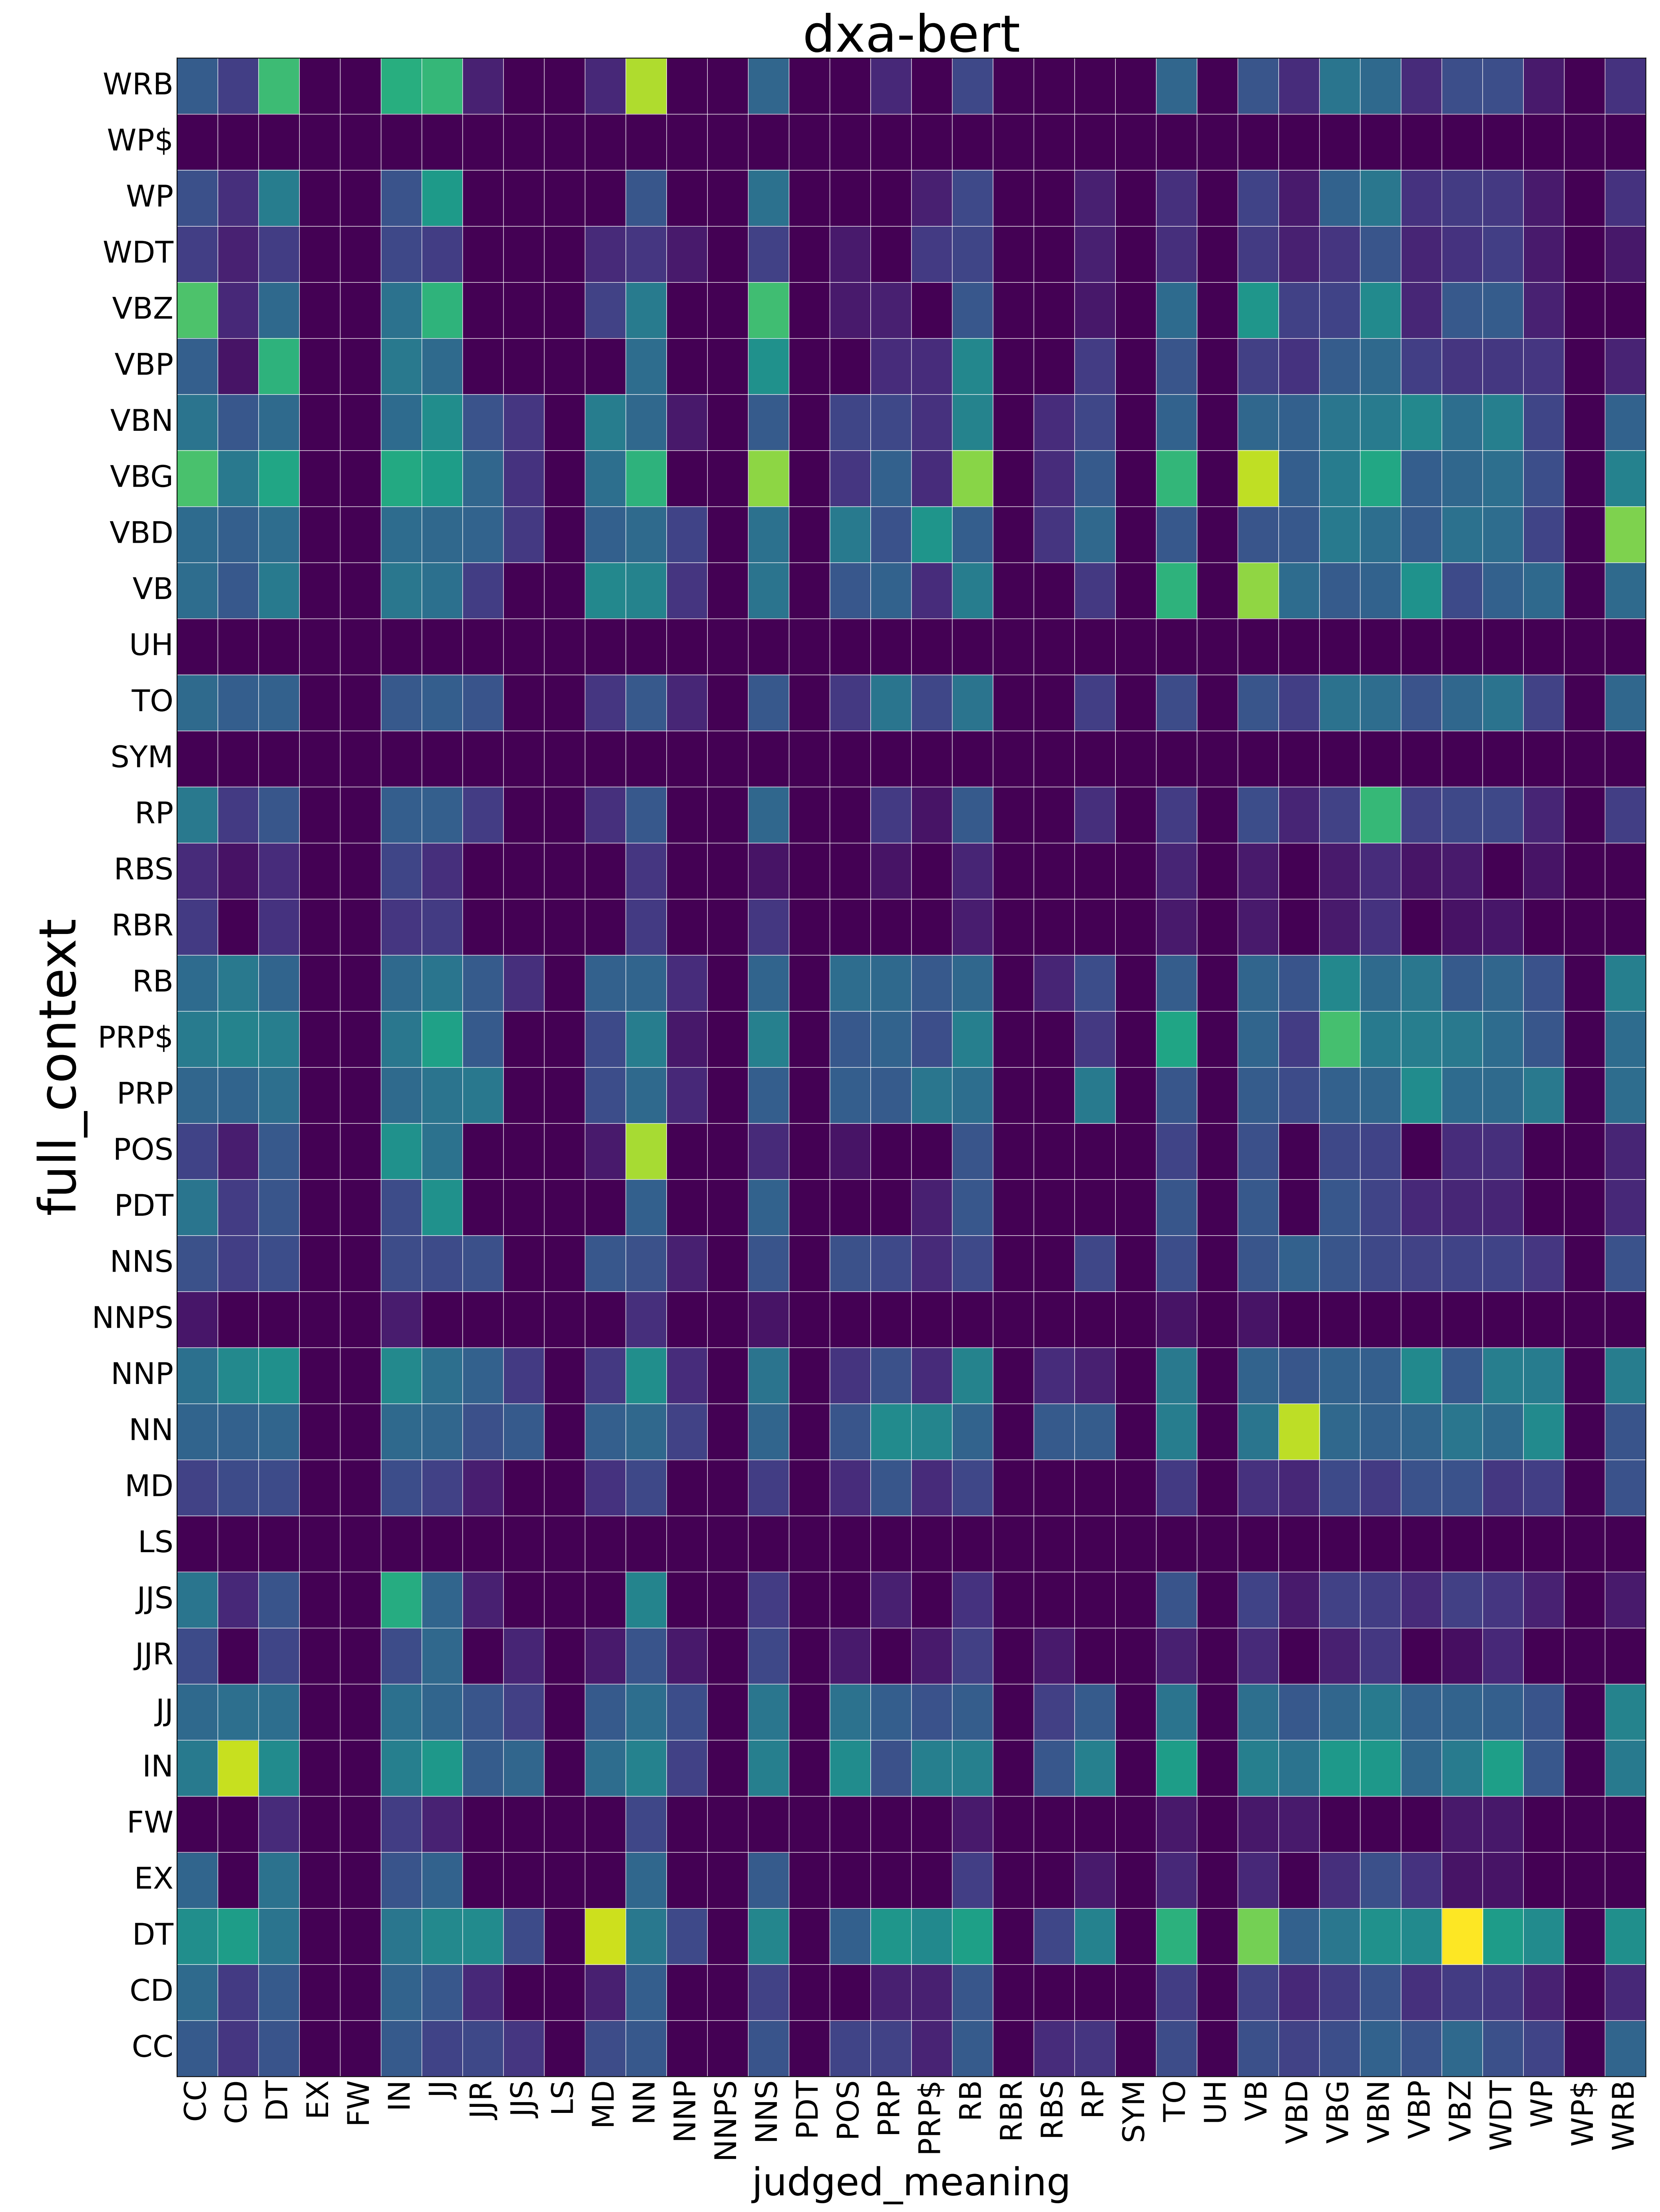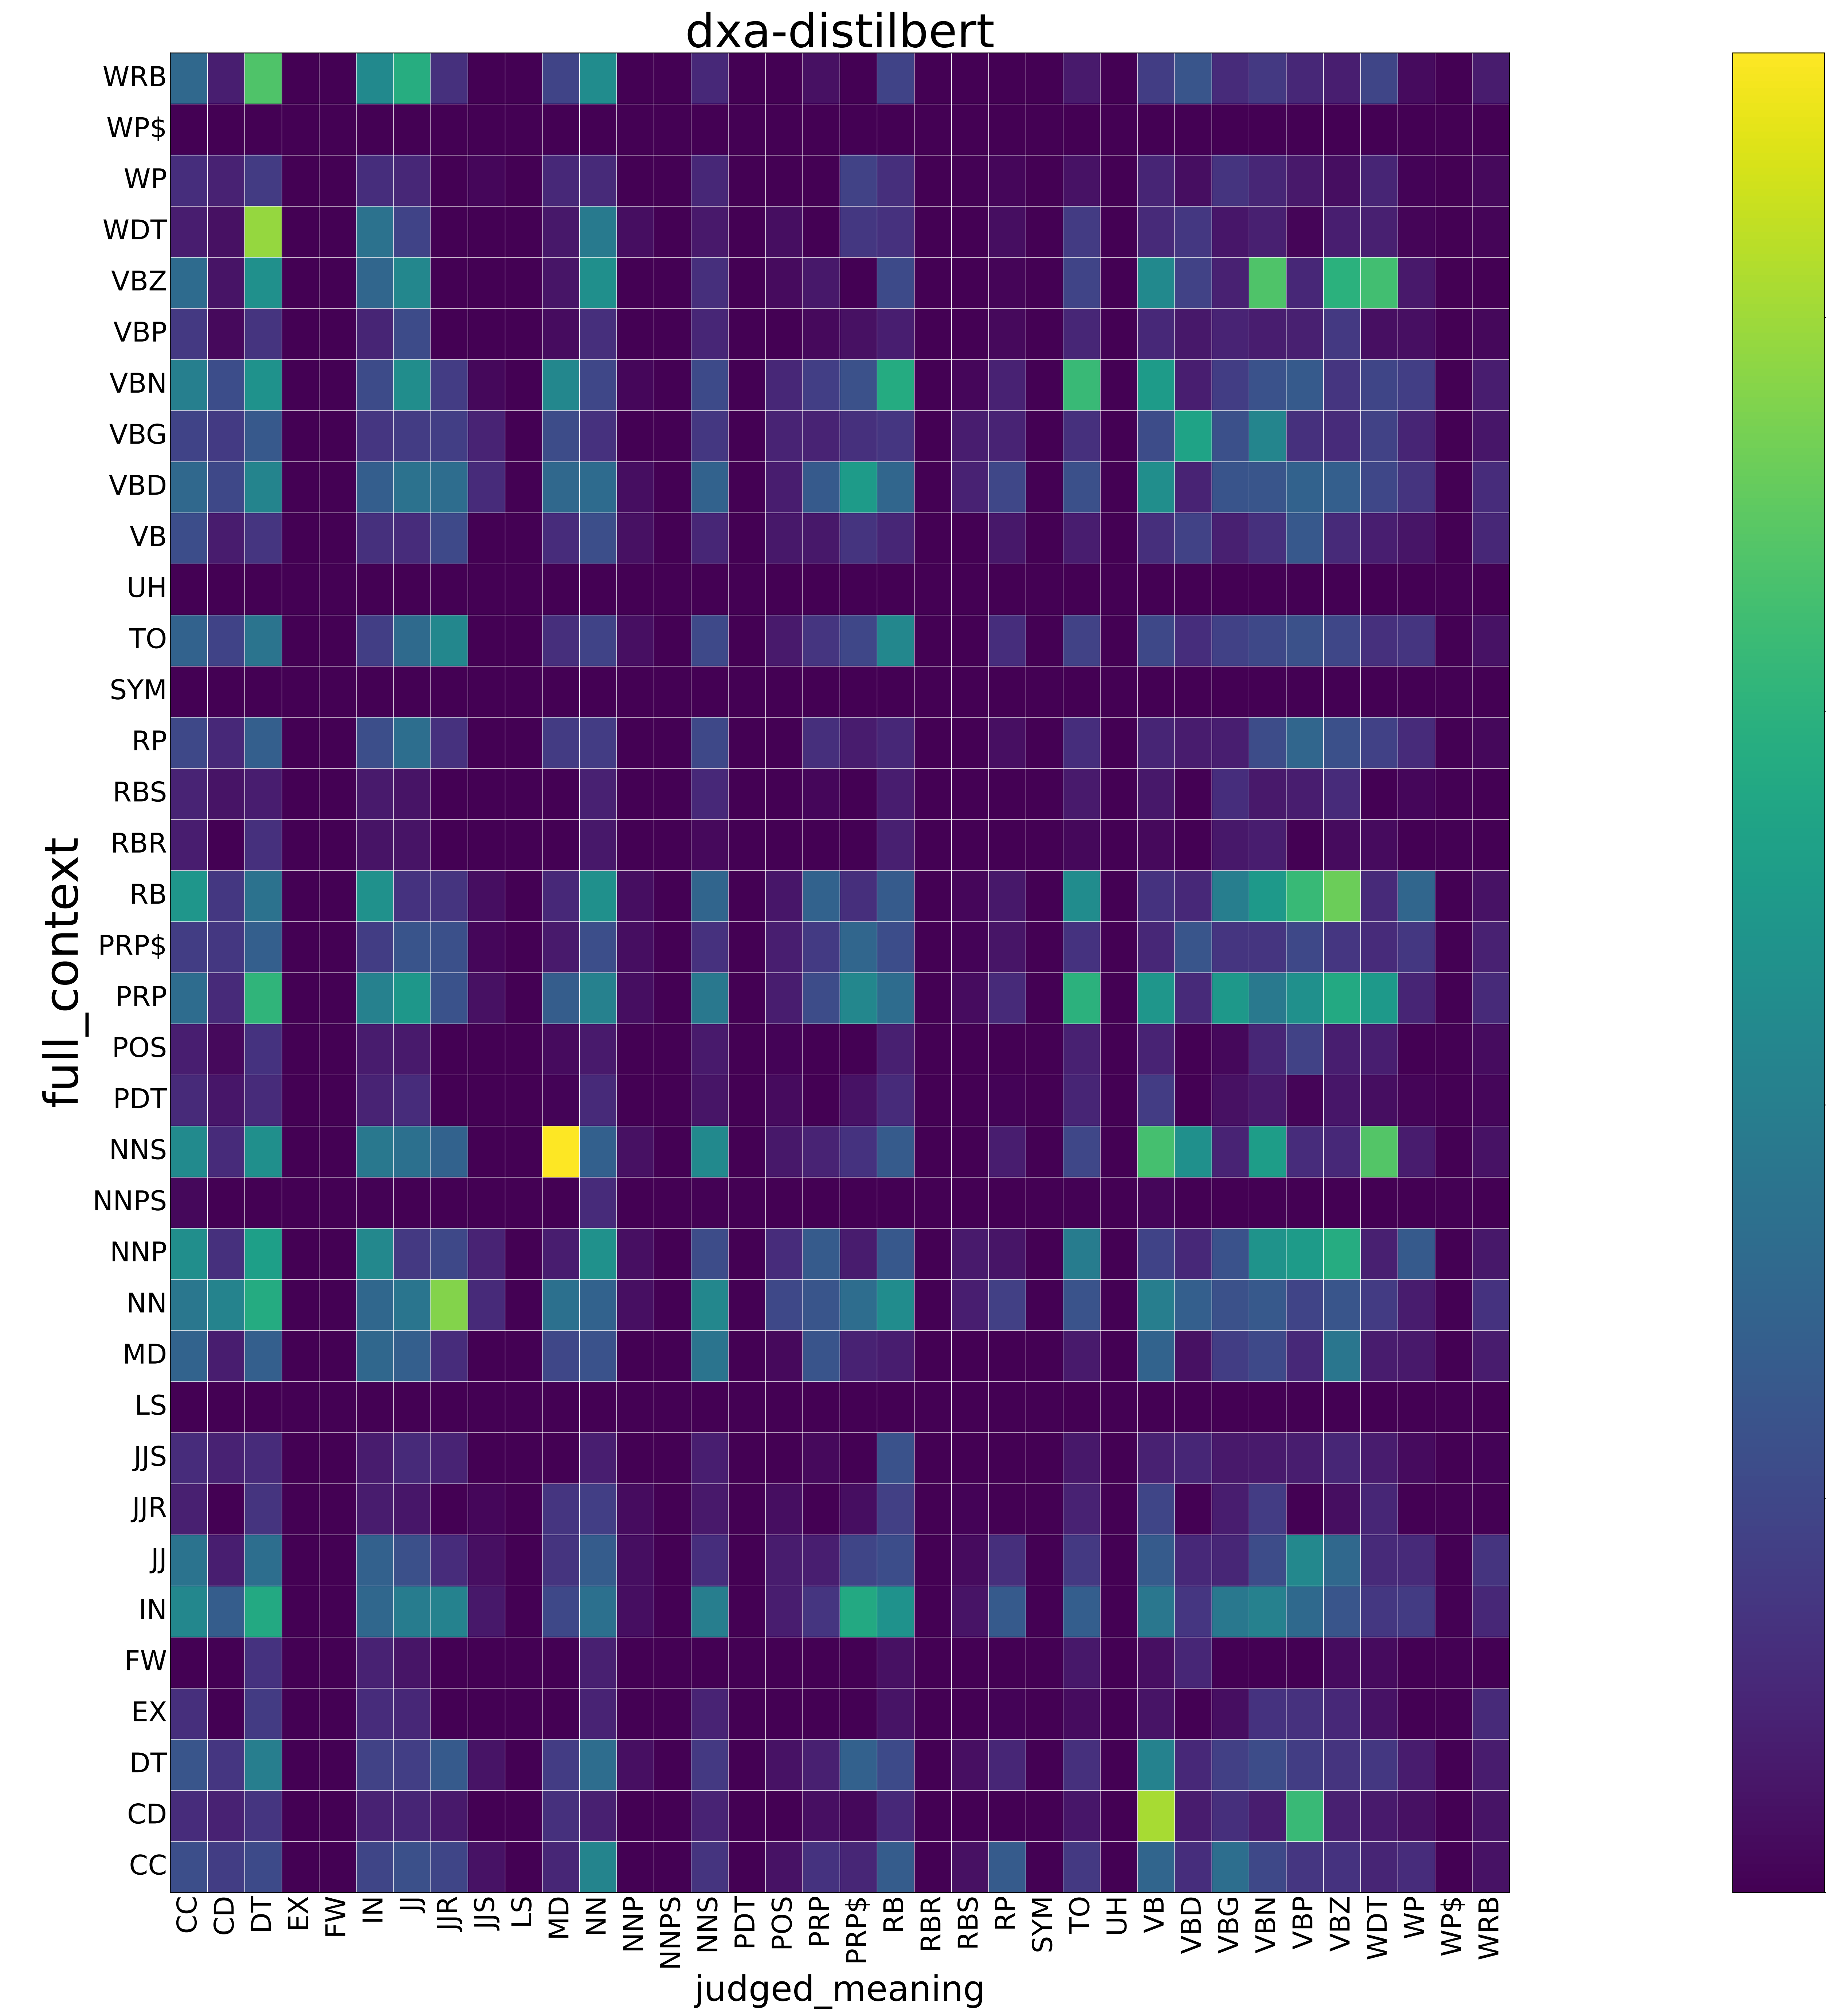

Supplement: SupplementaryMaterial [file dxa_cv_all.pdf › figures/dxa_cv_all.pdf]

CV of <full\_context, judged\_meaning> Negative Example Pairs  
Similarity Scores for DXA

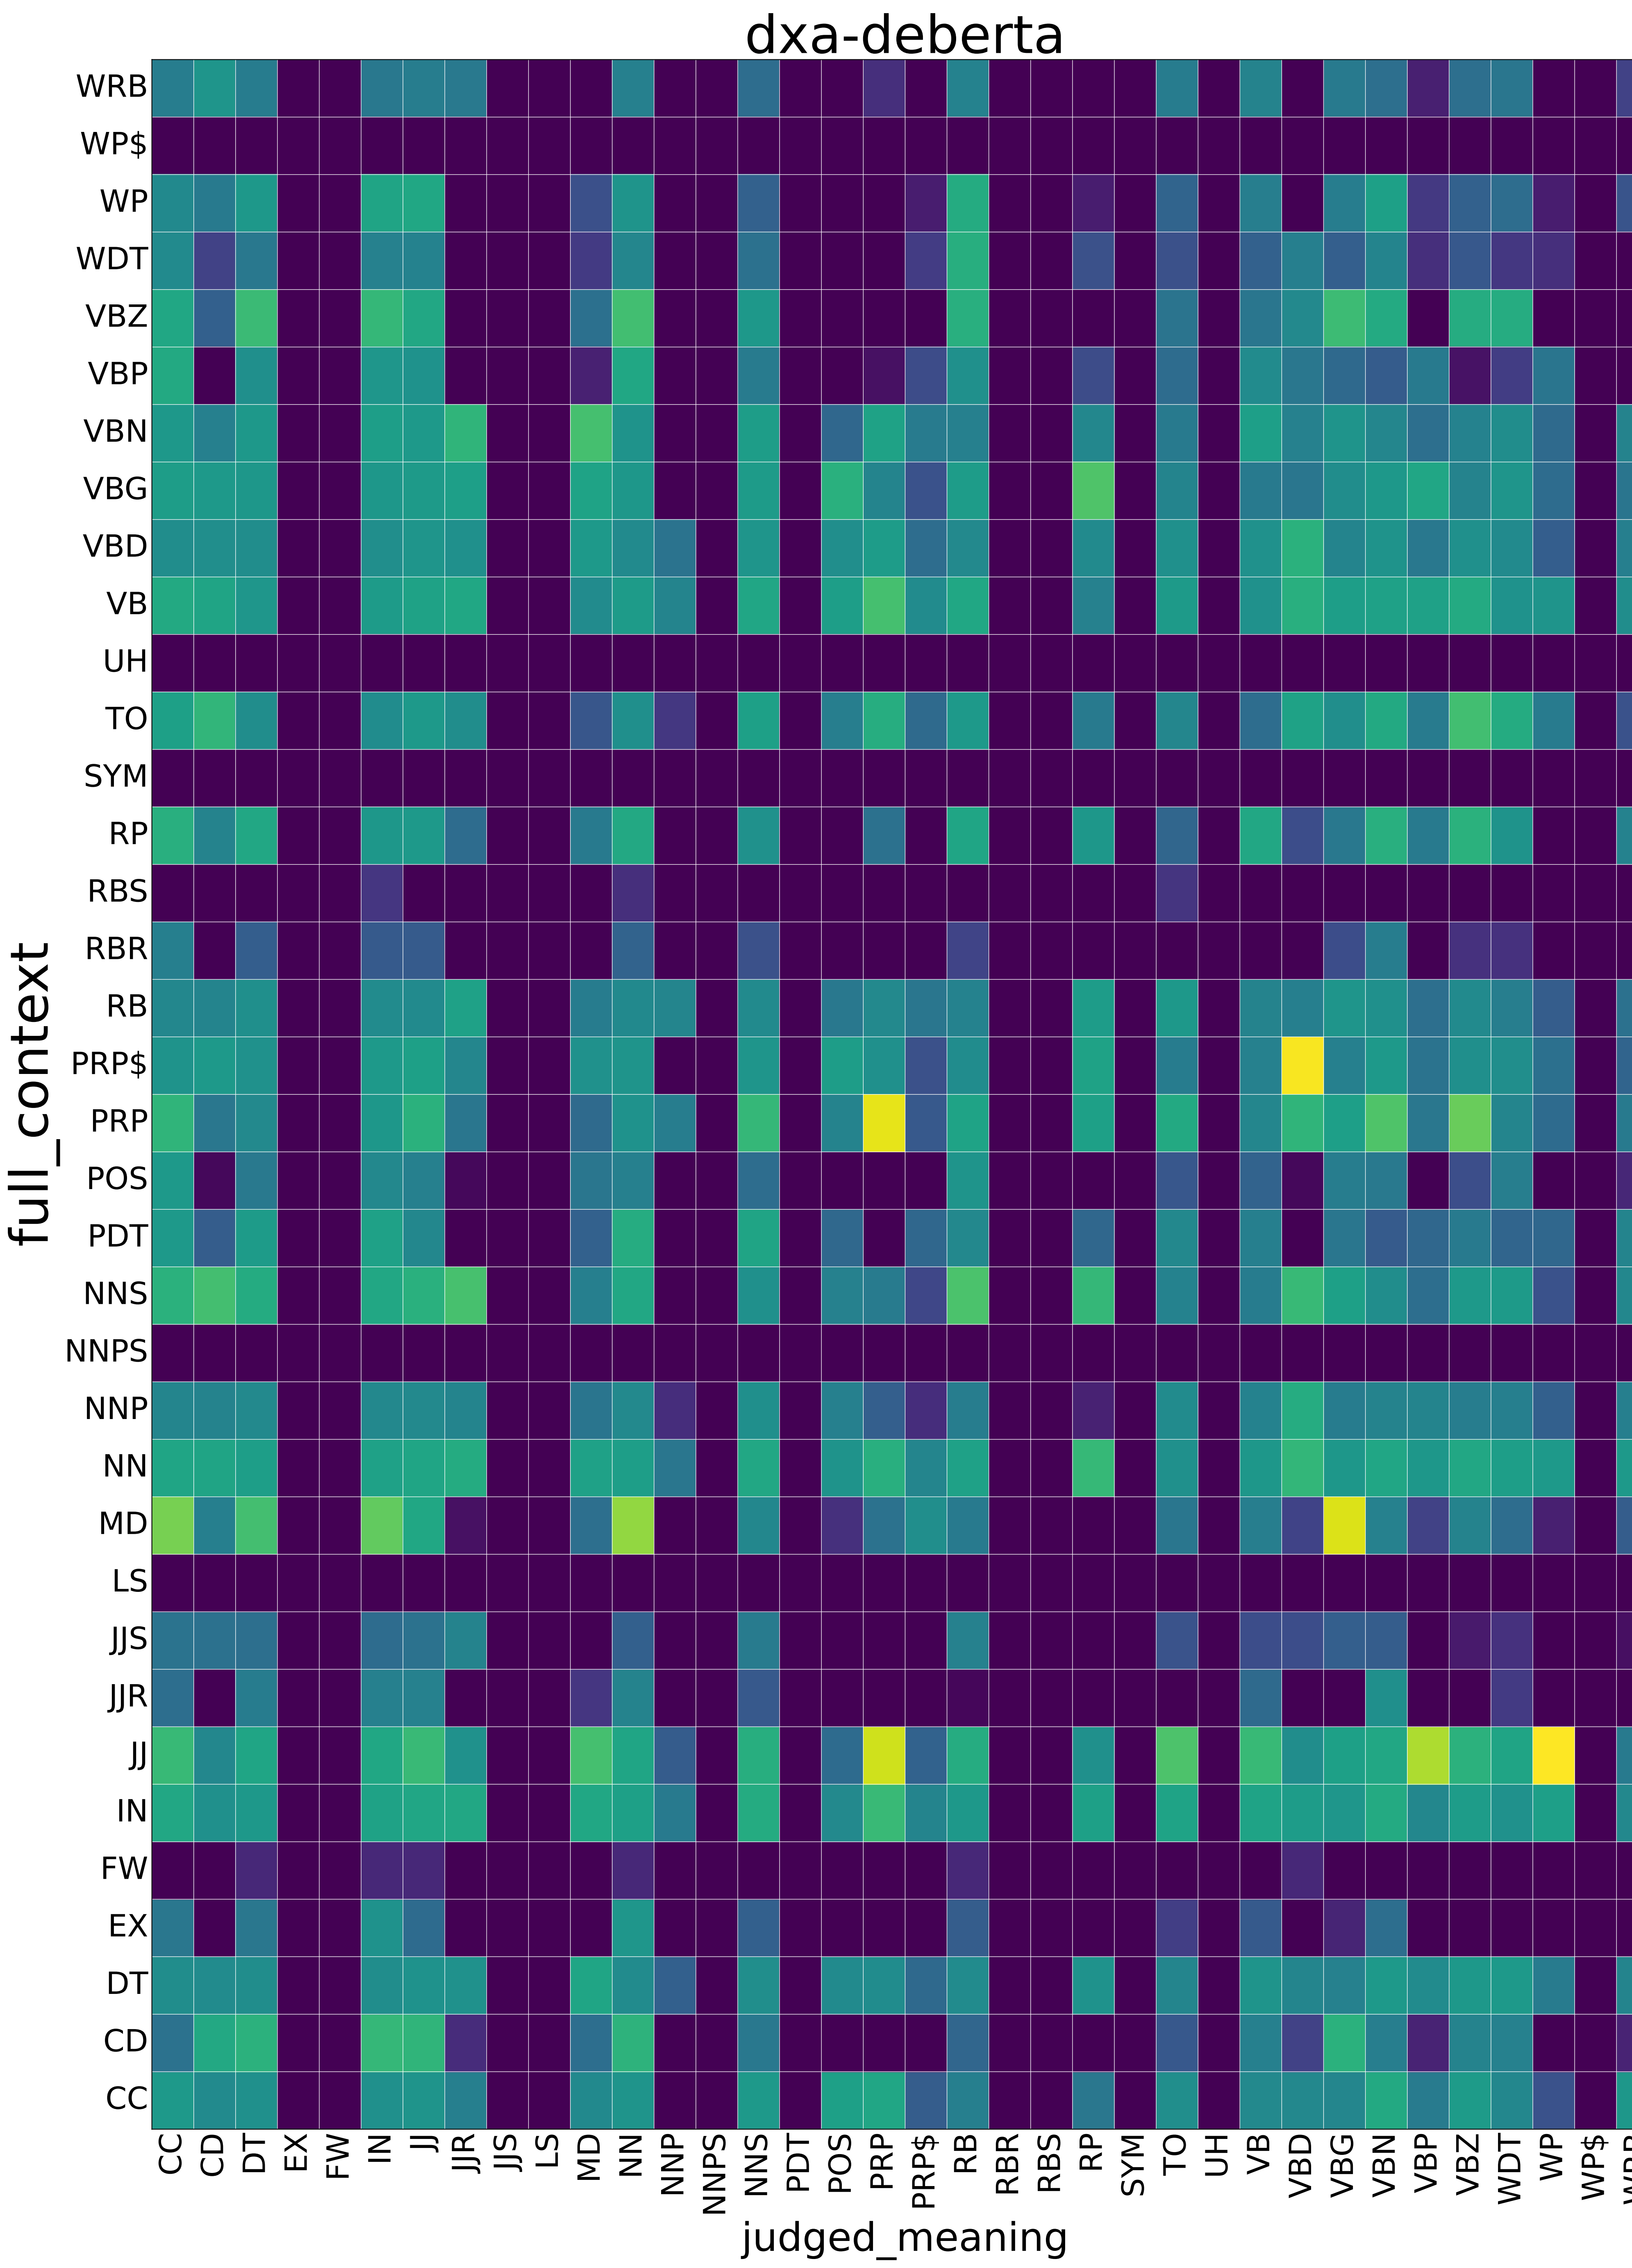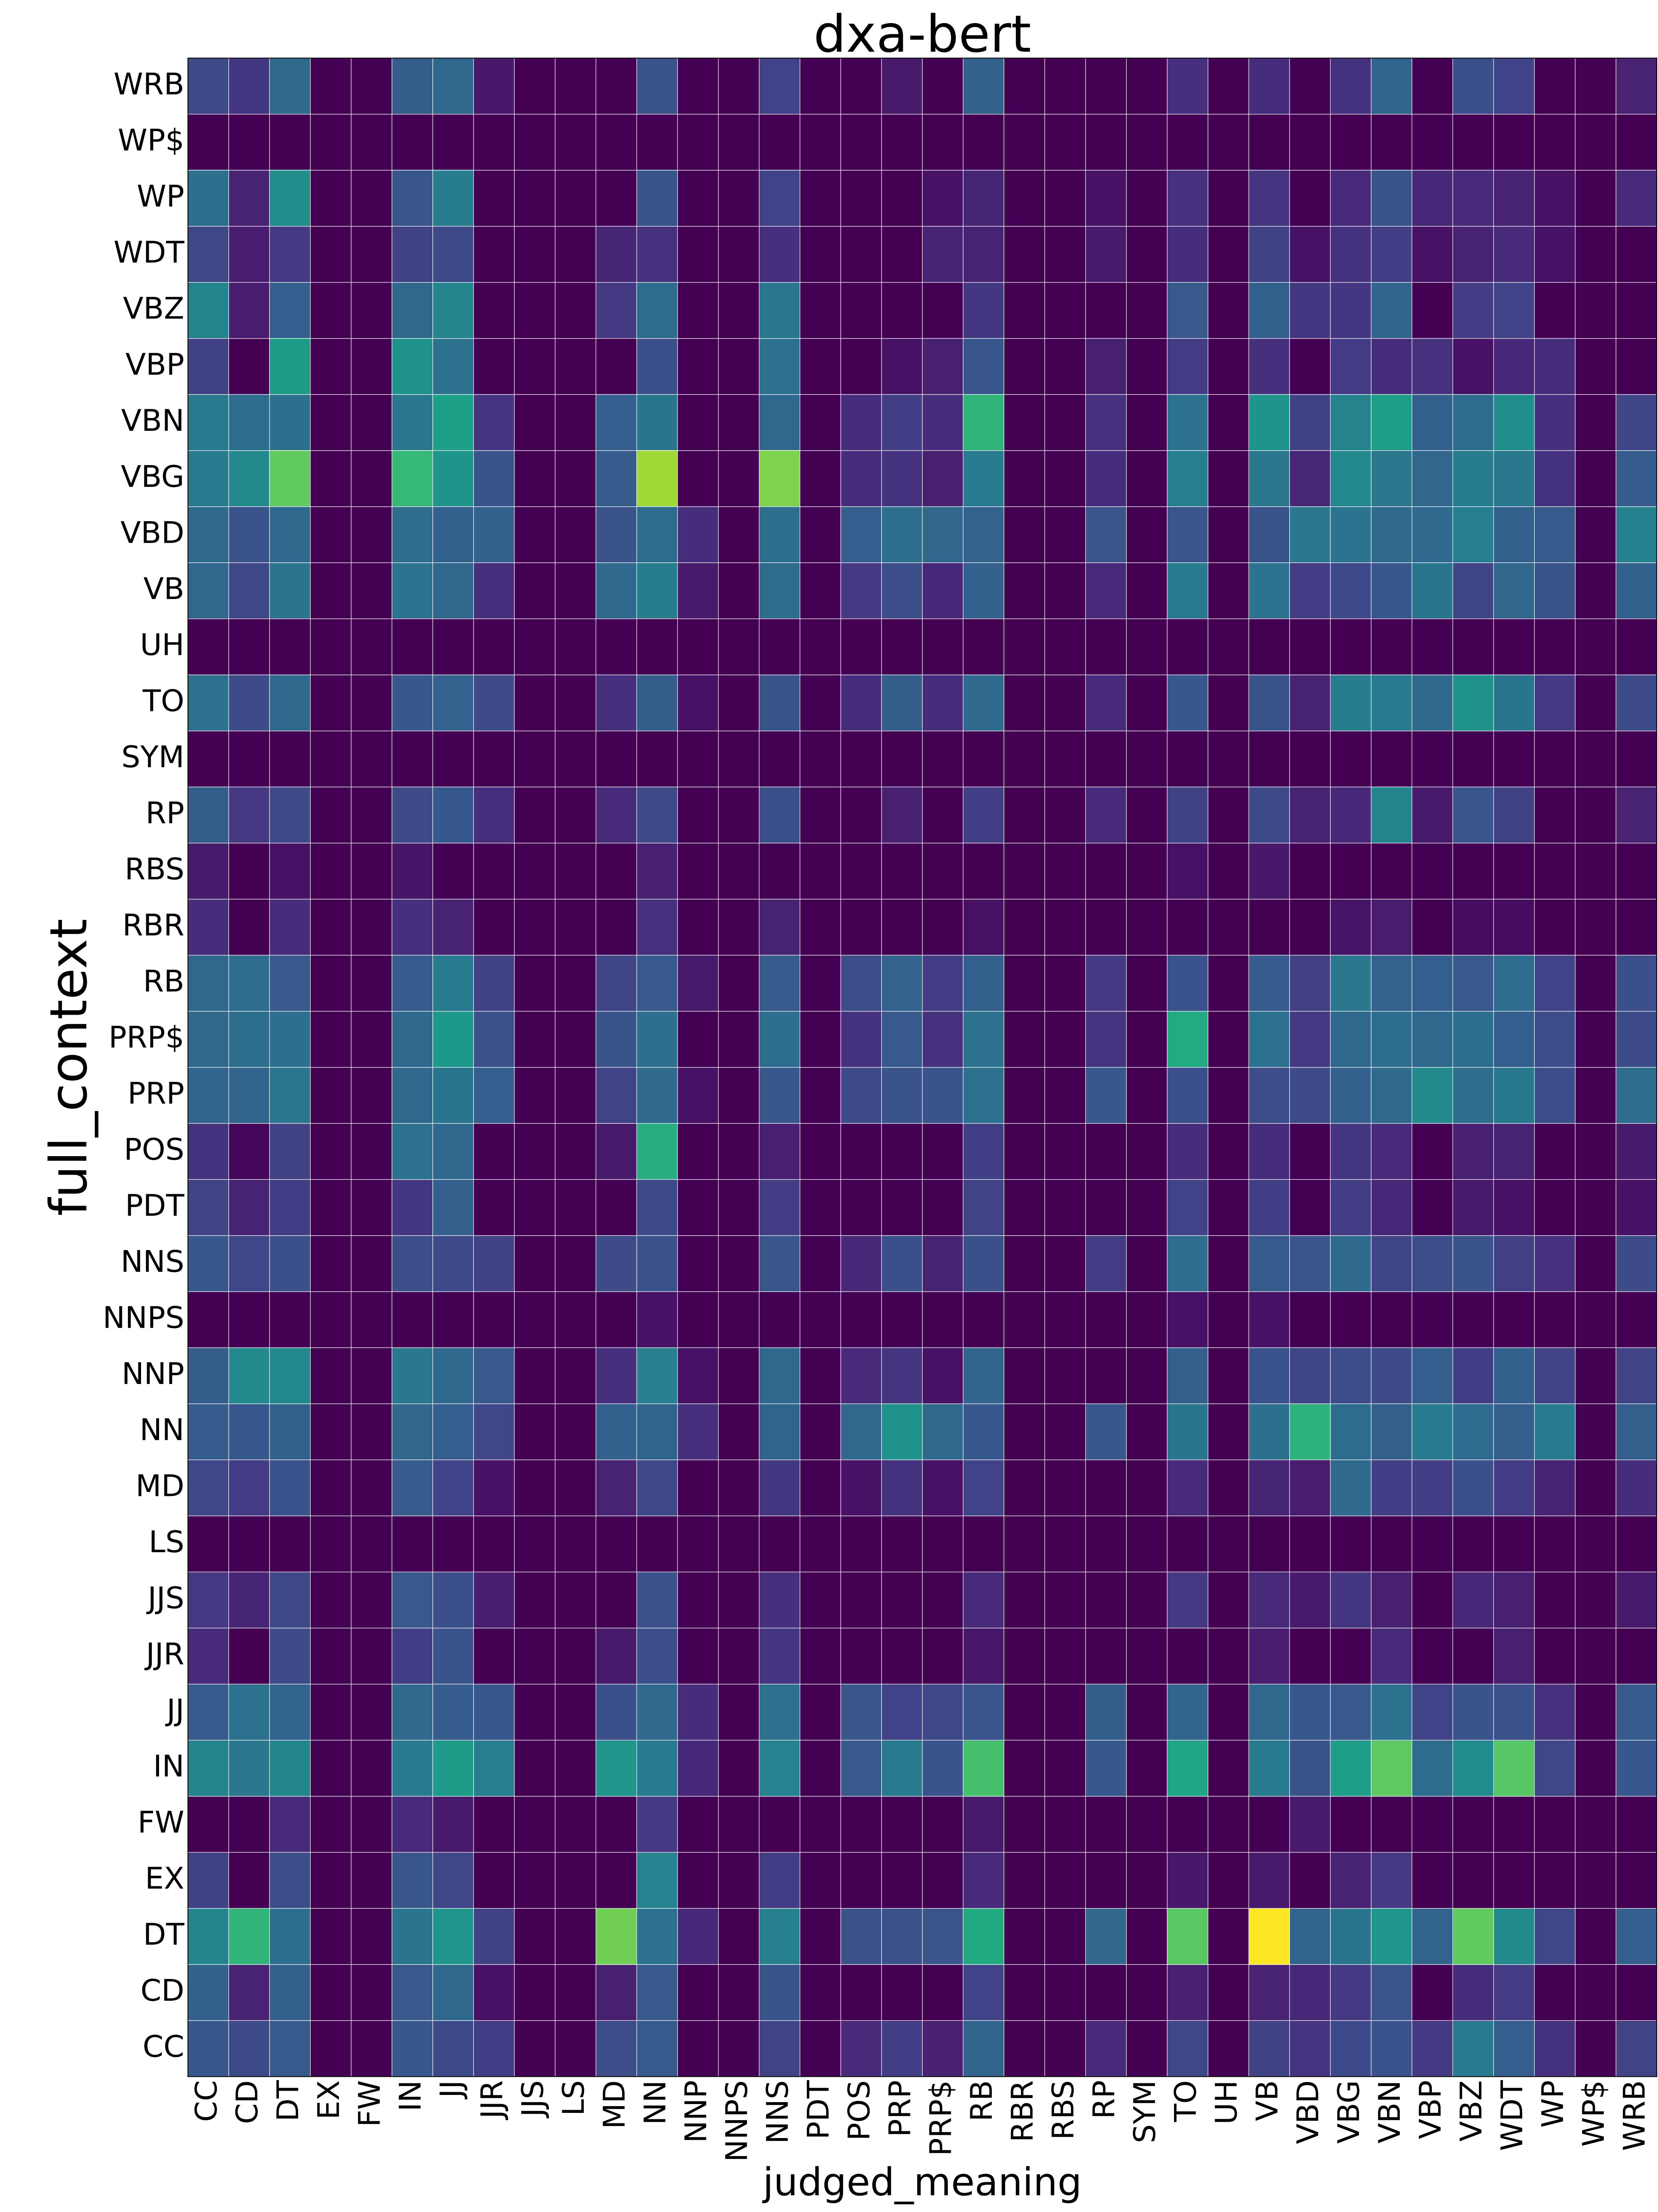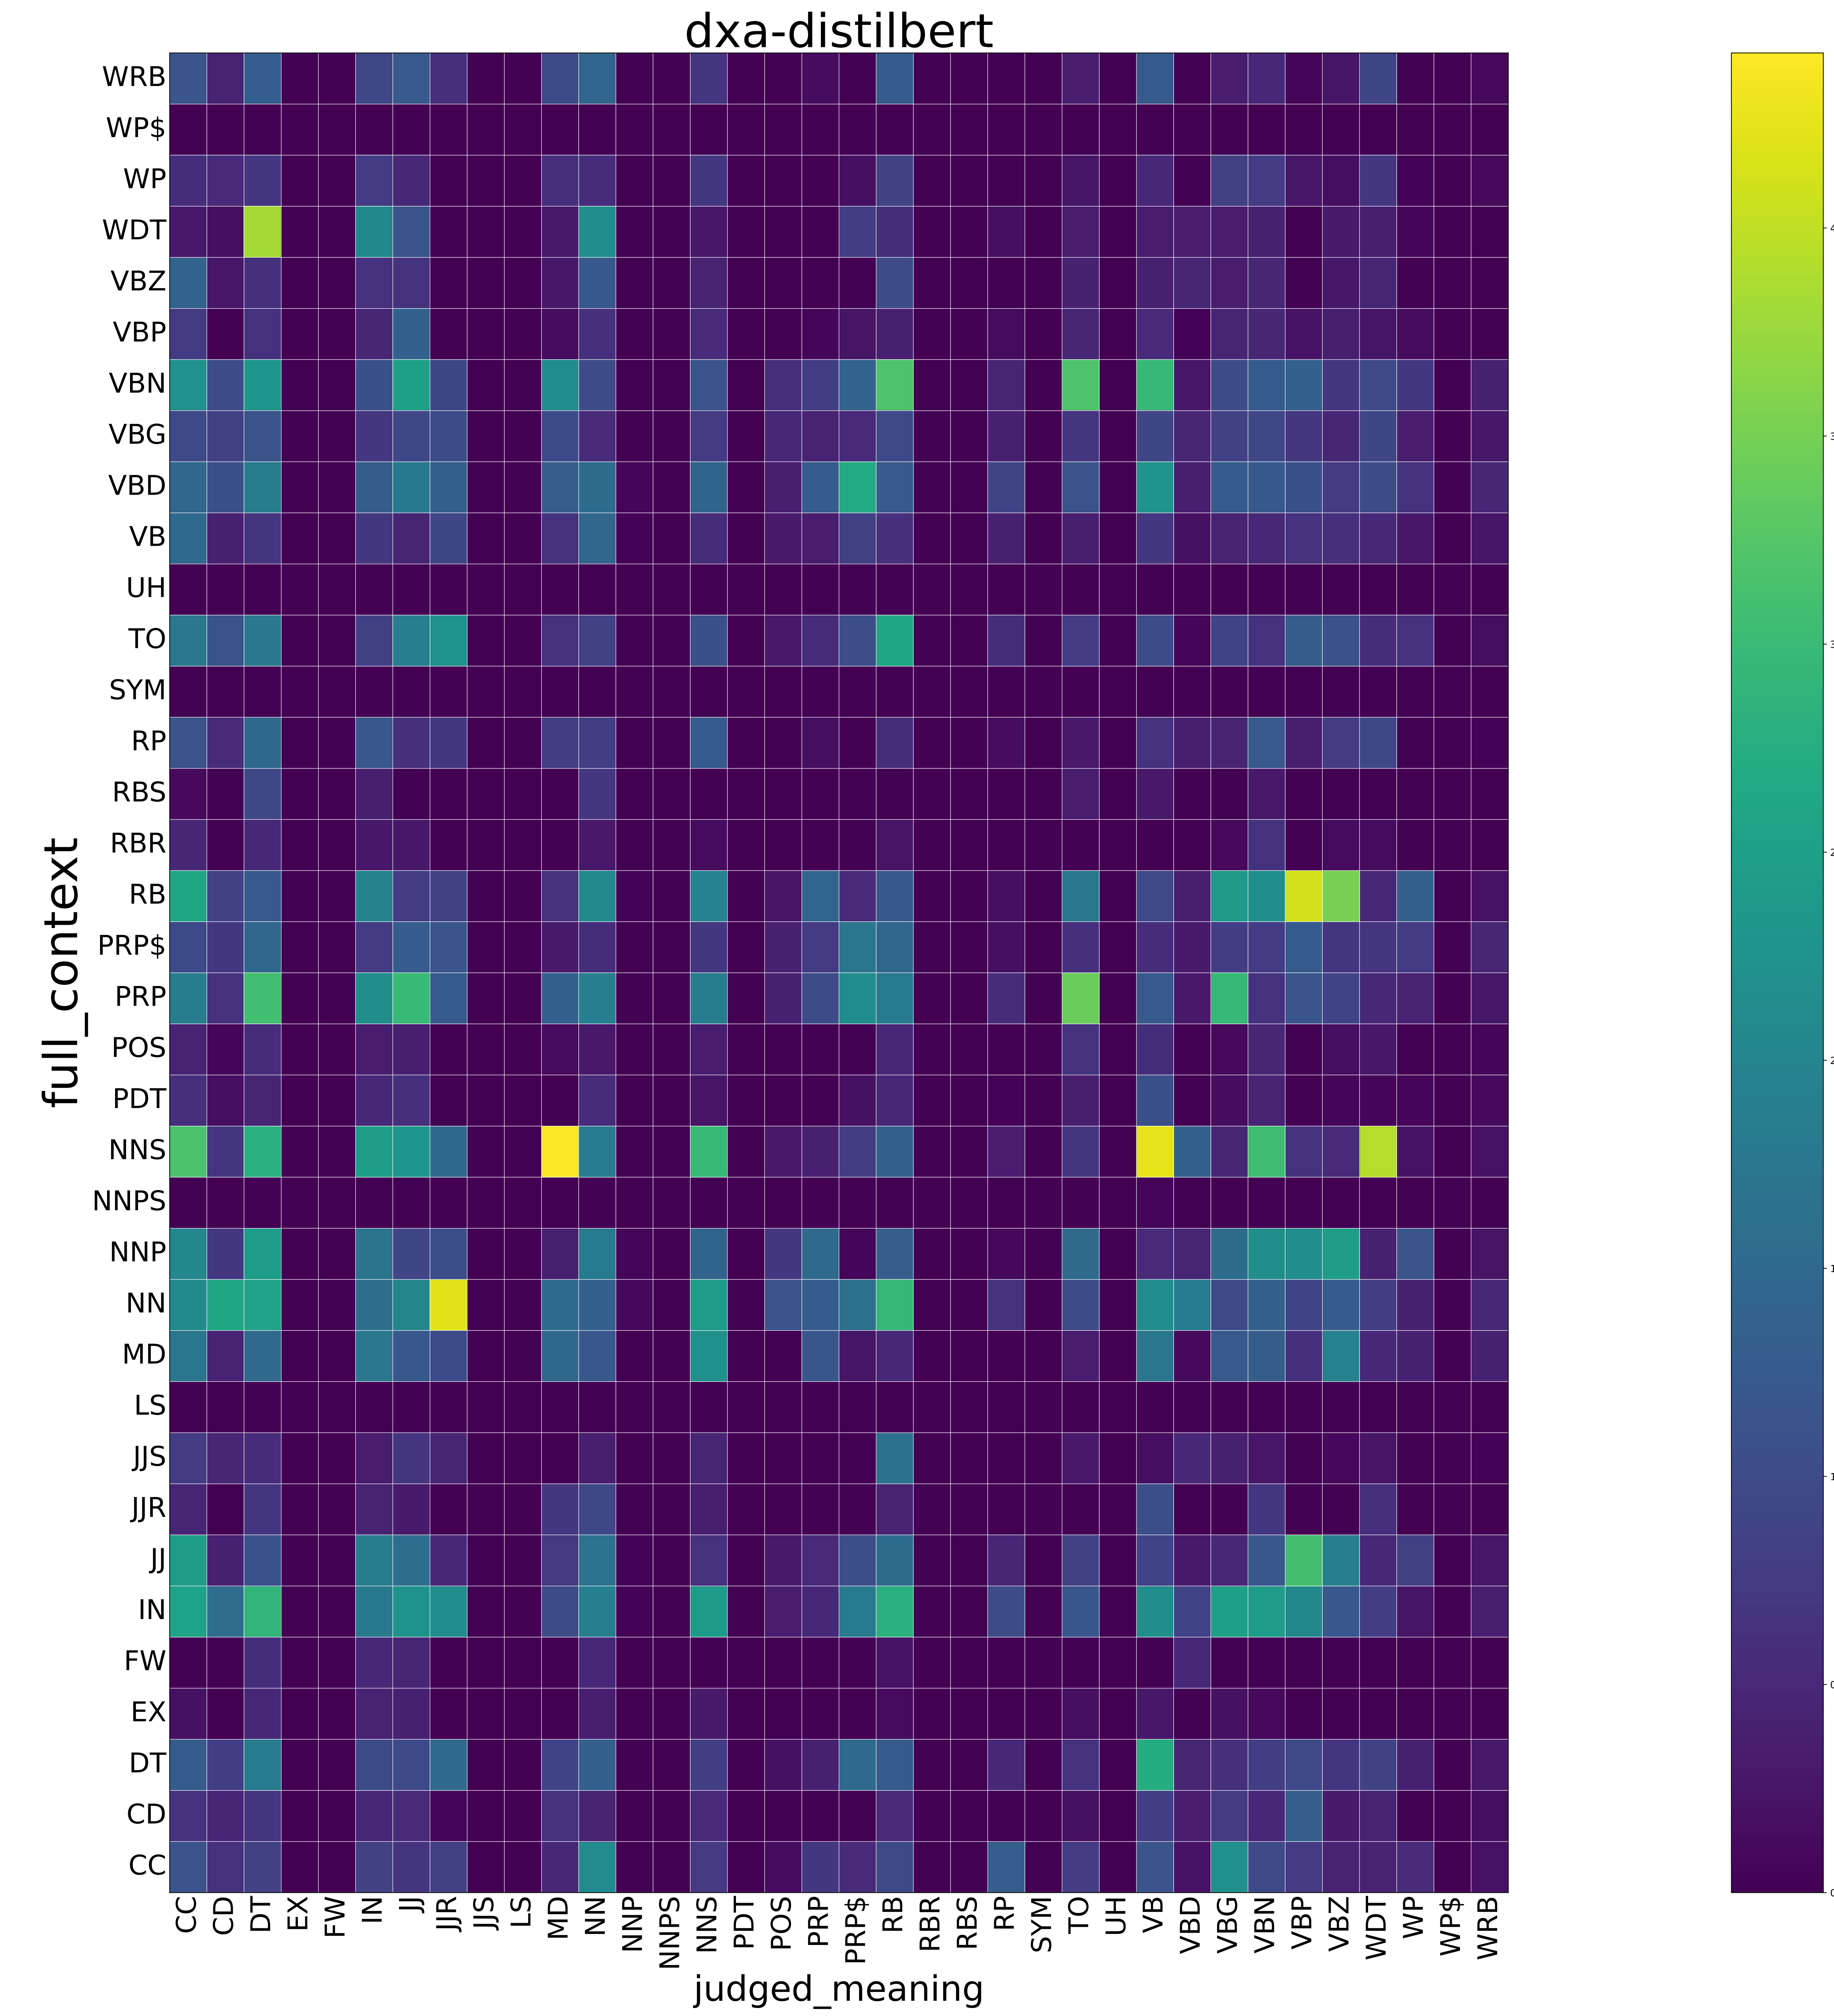

Supplement: SupplementaryMaterial [file dxa_cv_negative.pdf › figures/dxa_cv_negative.pdf]

CV of <full\_context, judged\_meaning> Neutral Example Pairs  
Similarity Scores for DXA

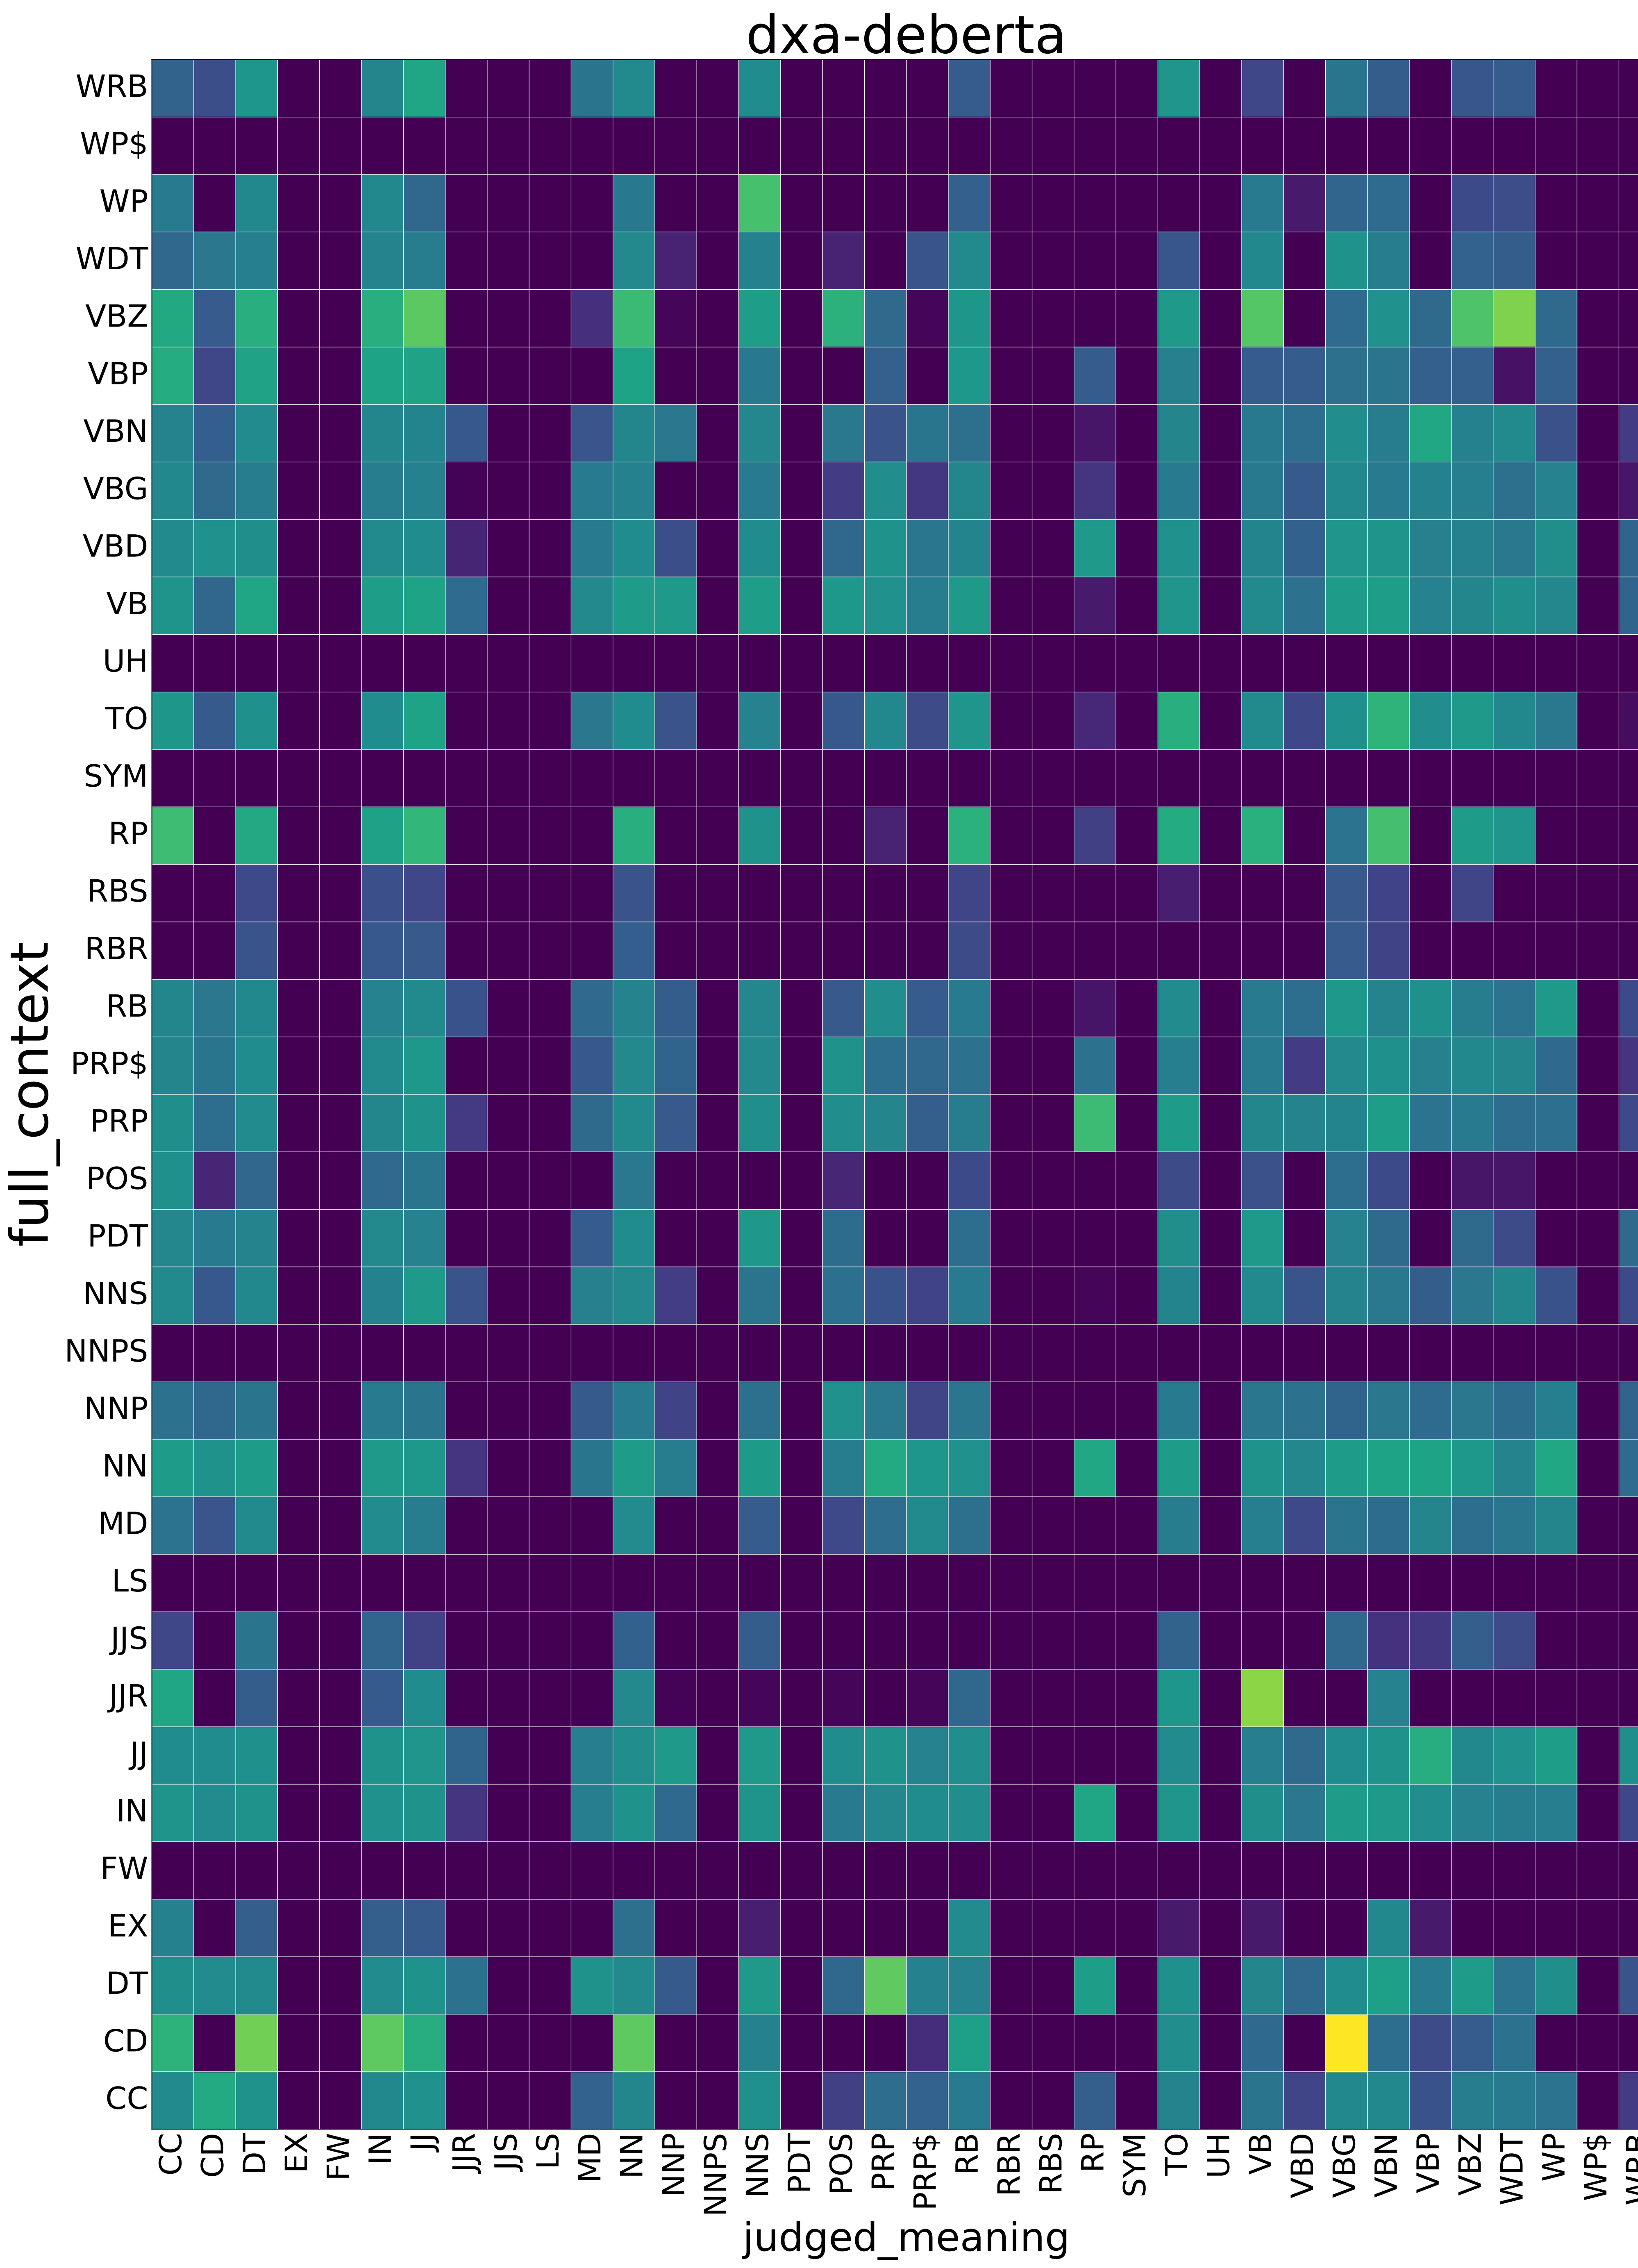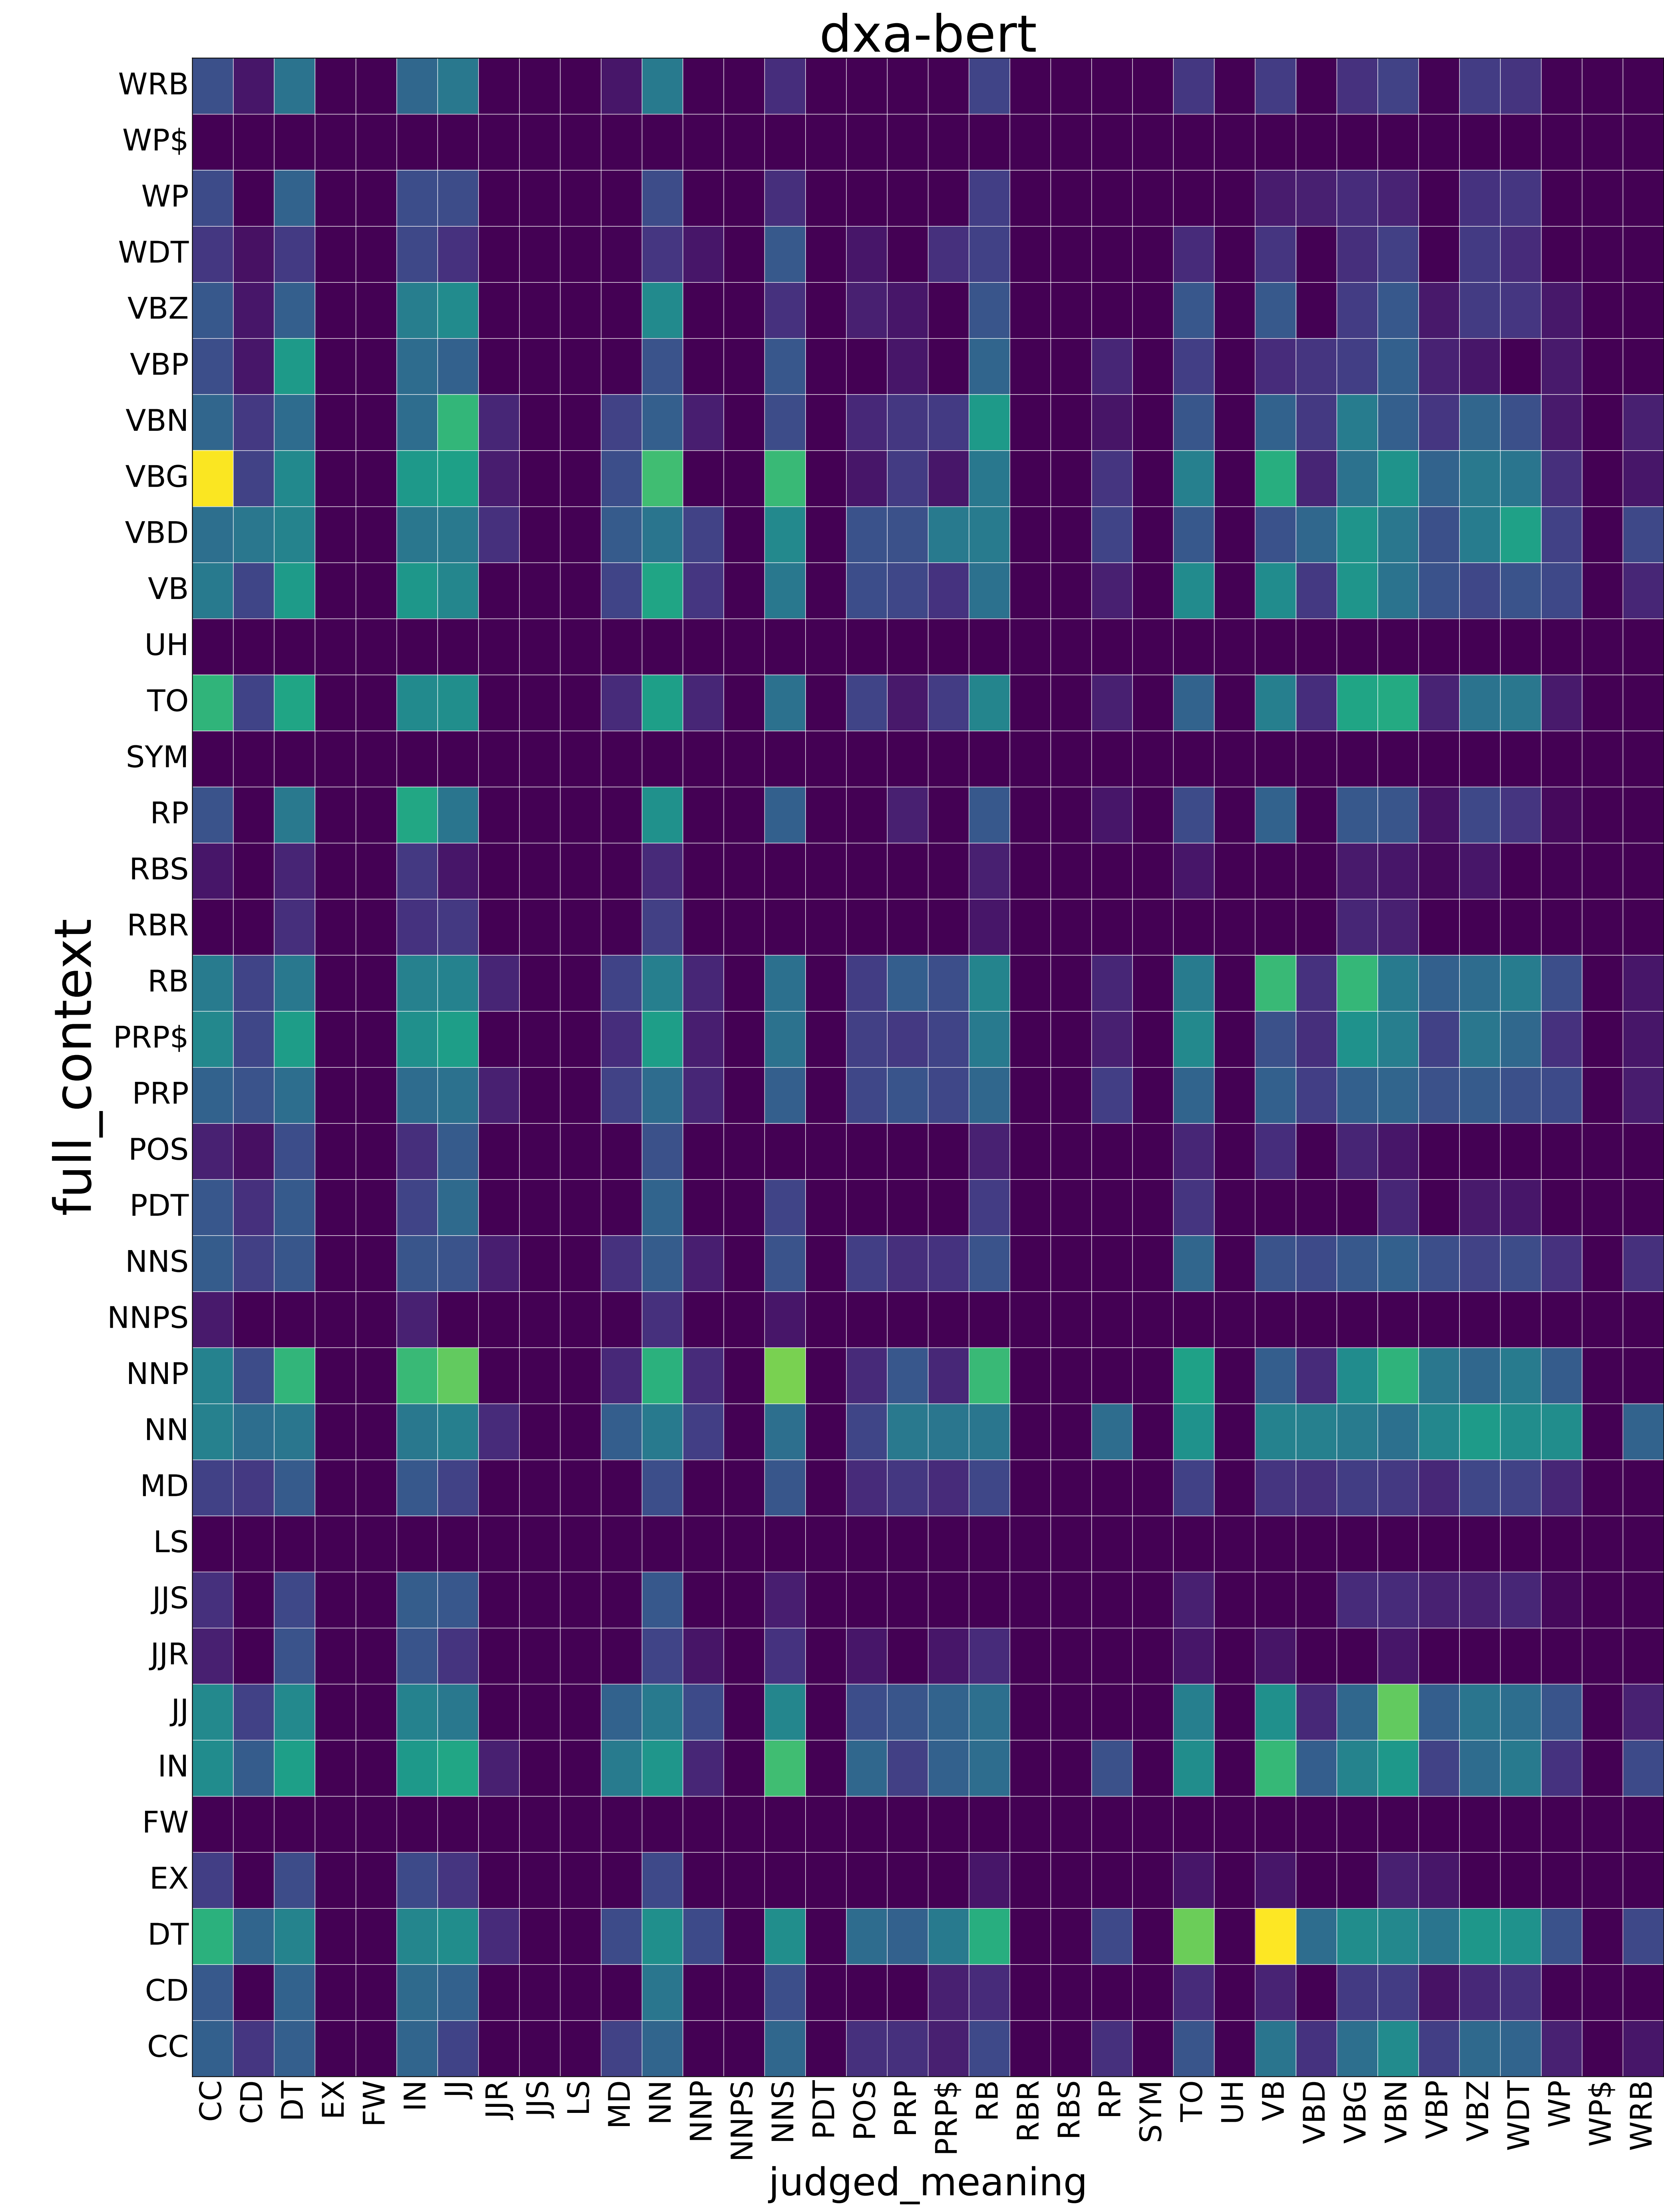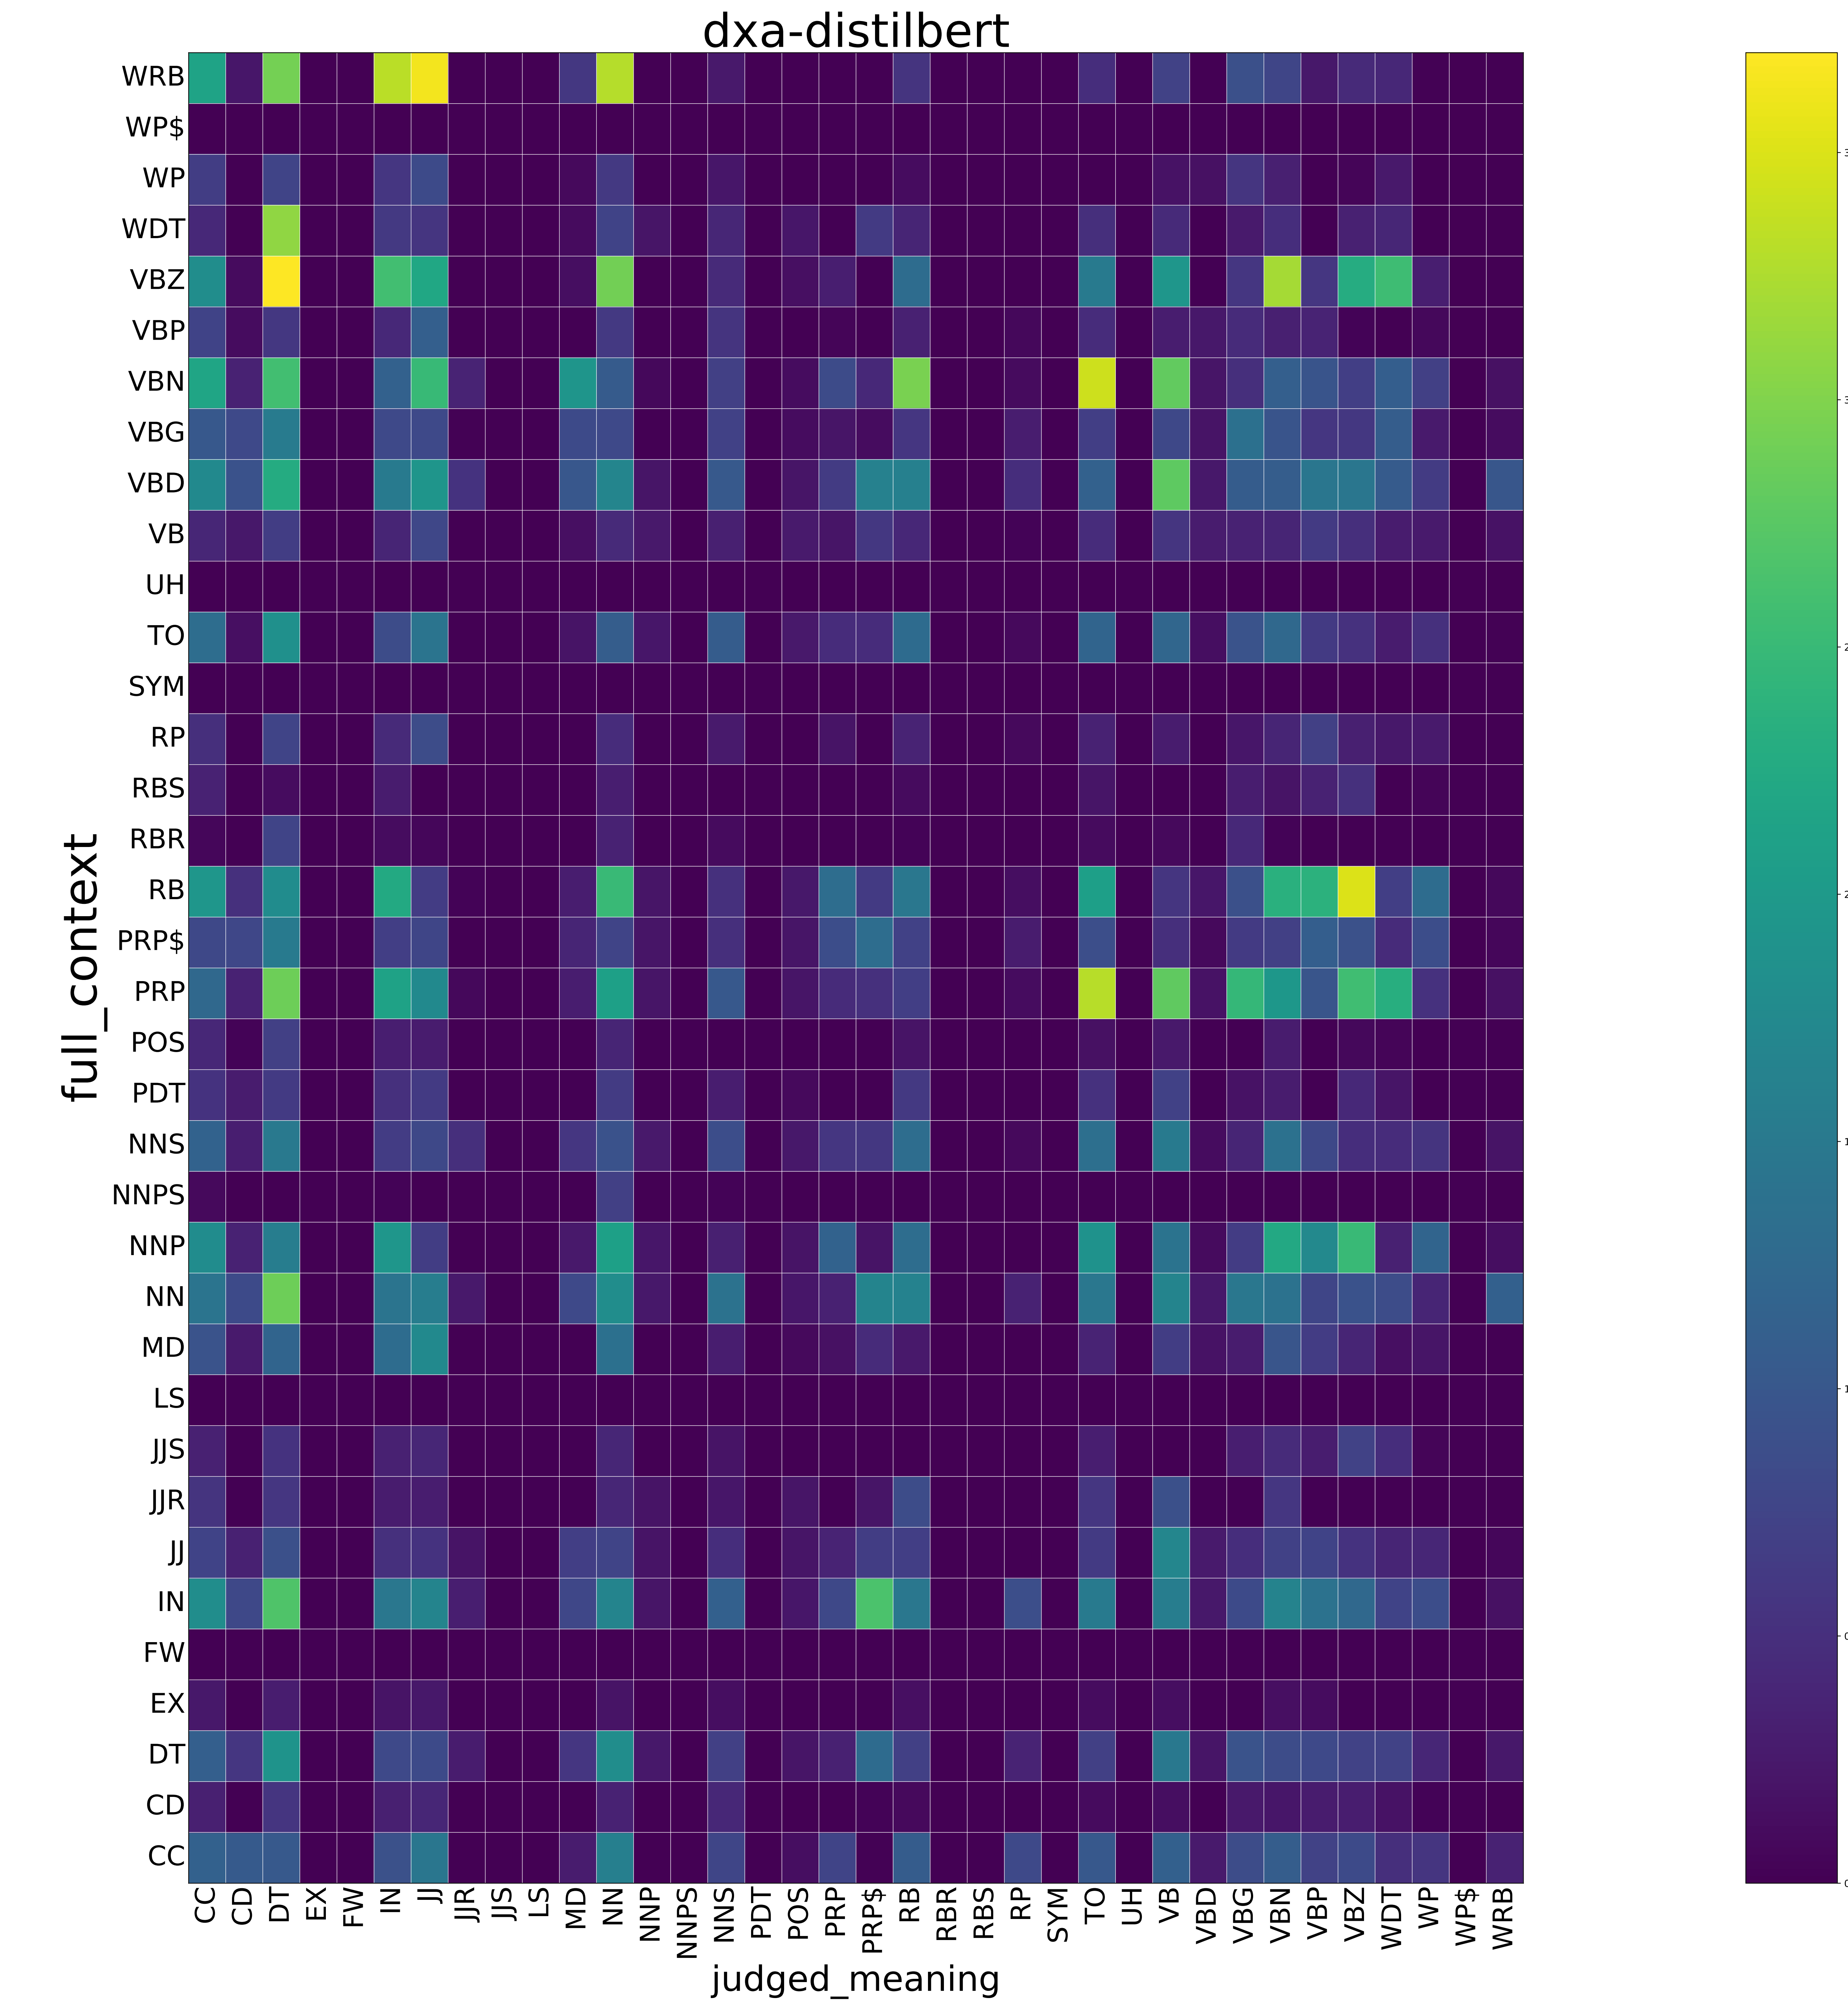

Supplement: SupplementaryMaterial [file dxa_cv_neutral.pdf › figures/dxa_cv_neutral.pdf]

CV of <full\_context, judged\_meaning> Positive Example Pairs  
Similarity Scores for DXA

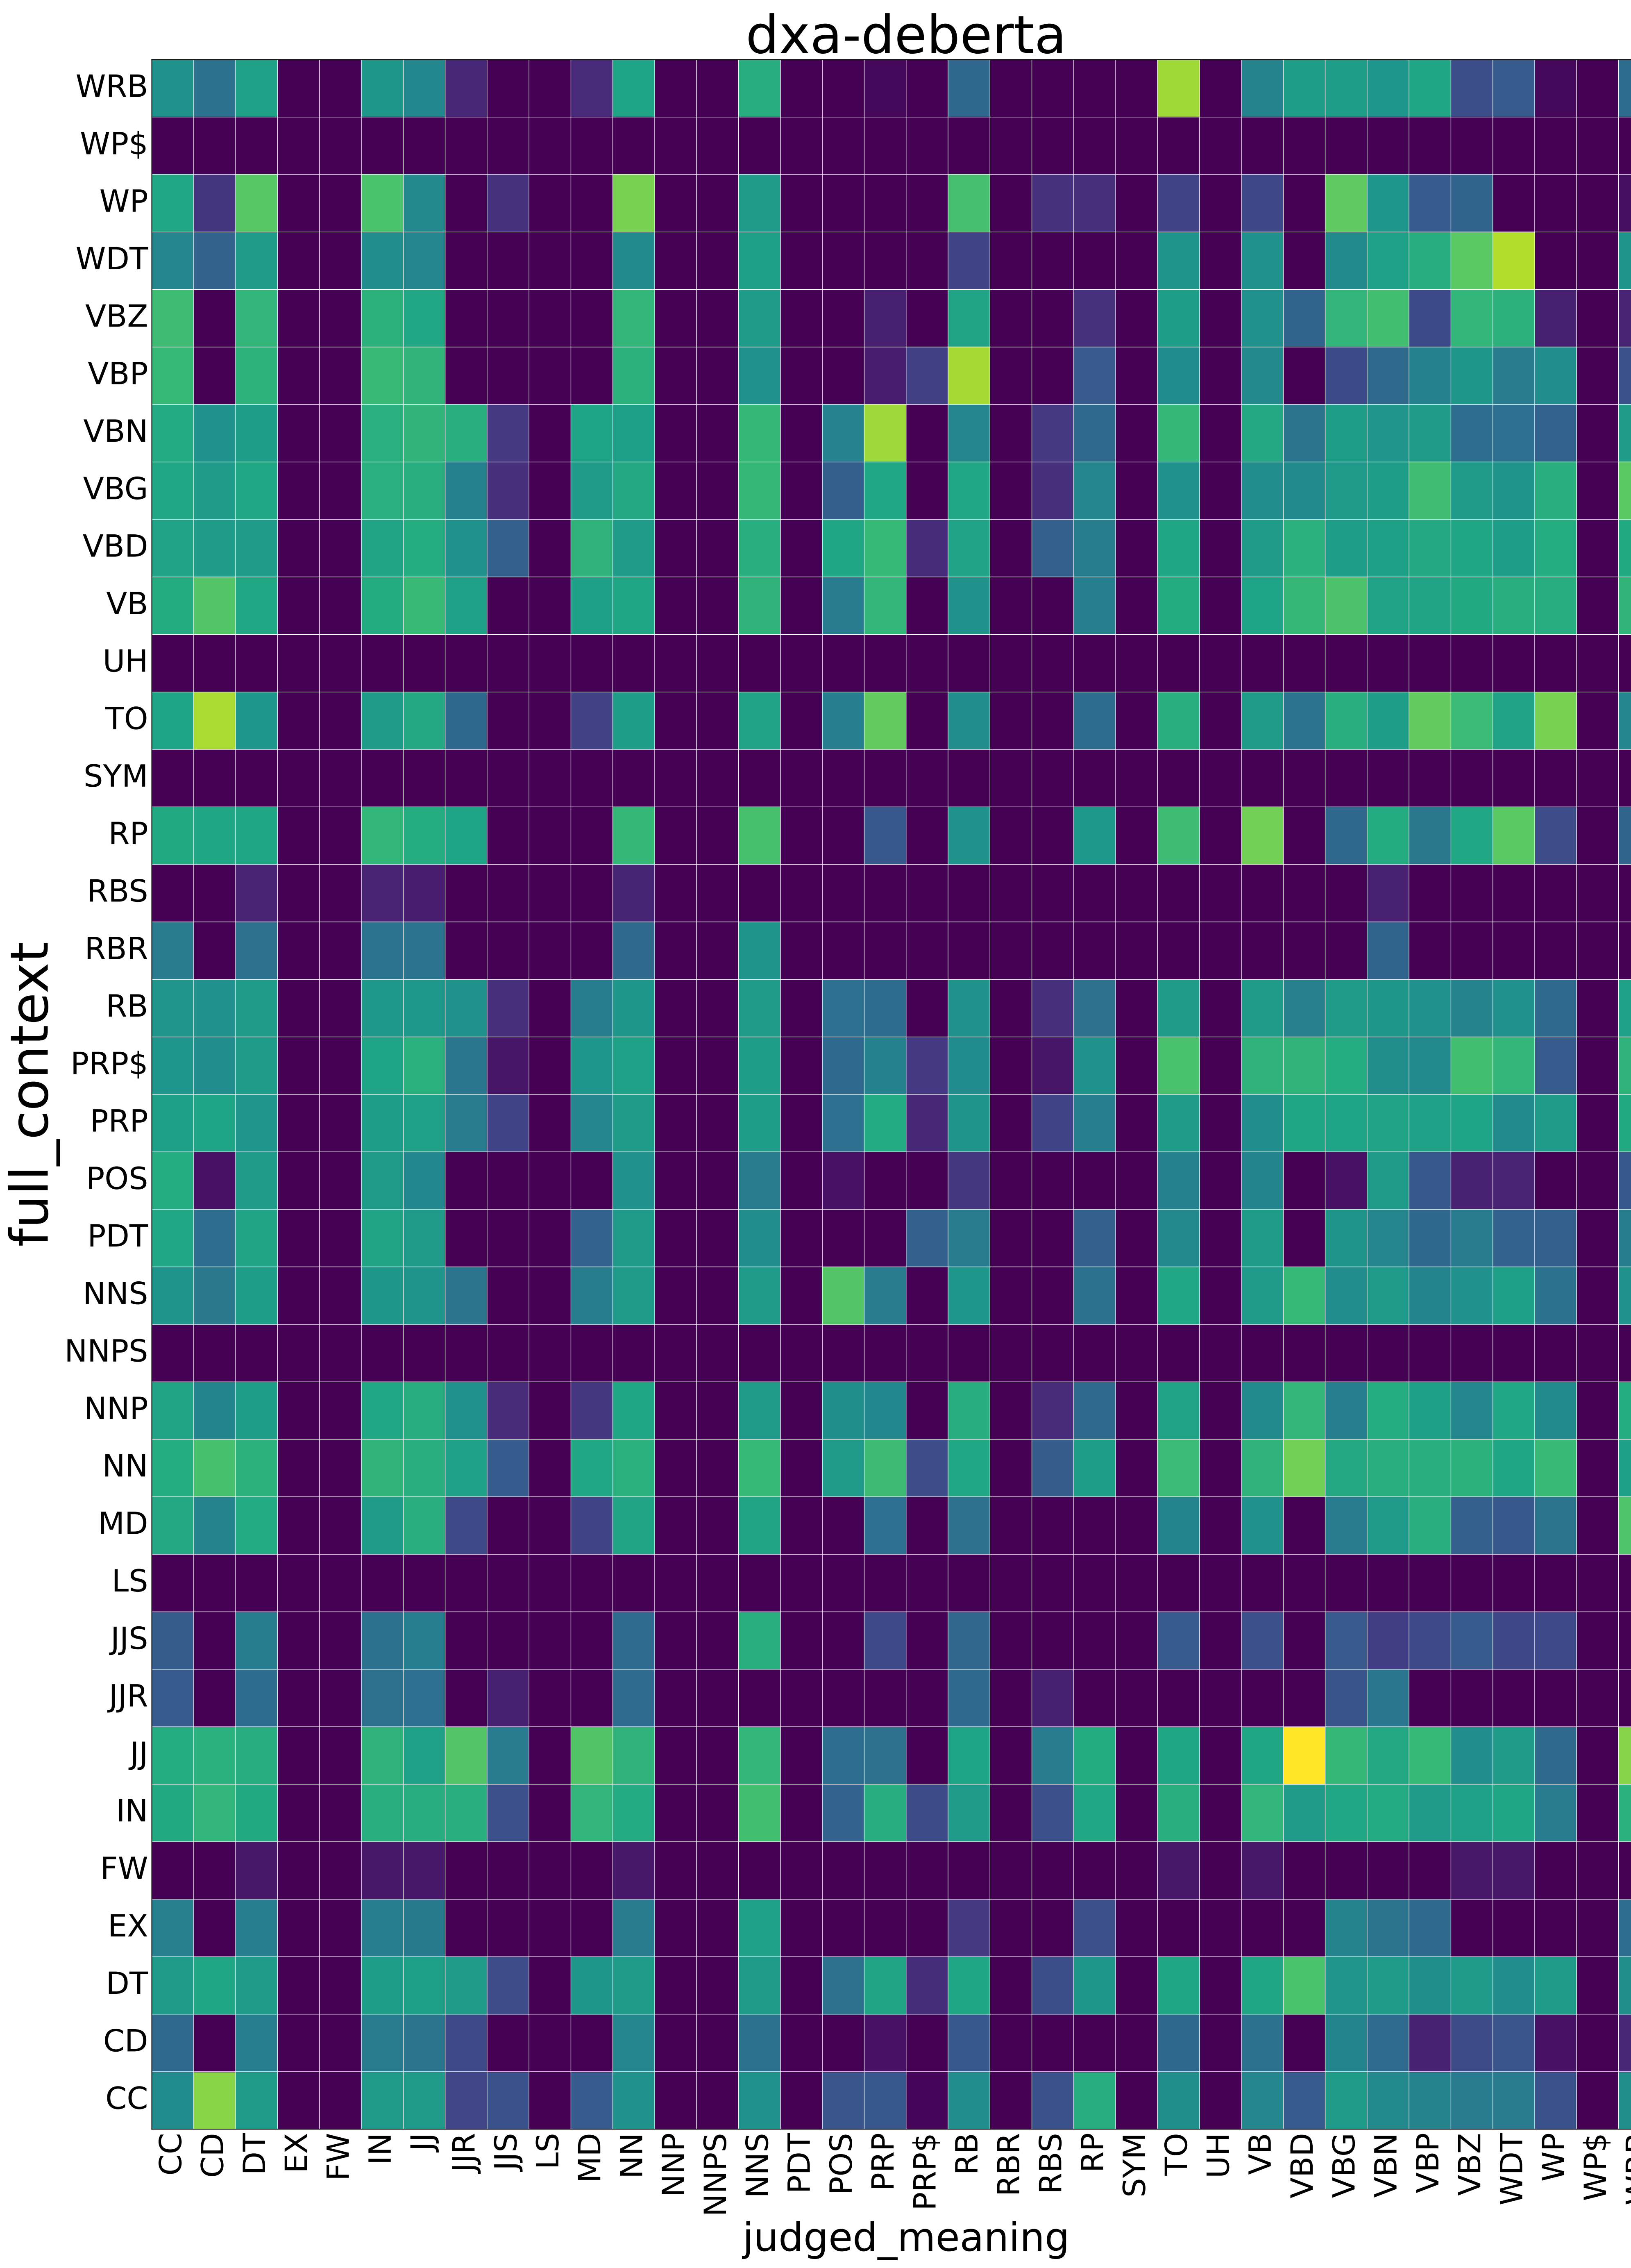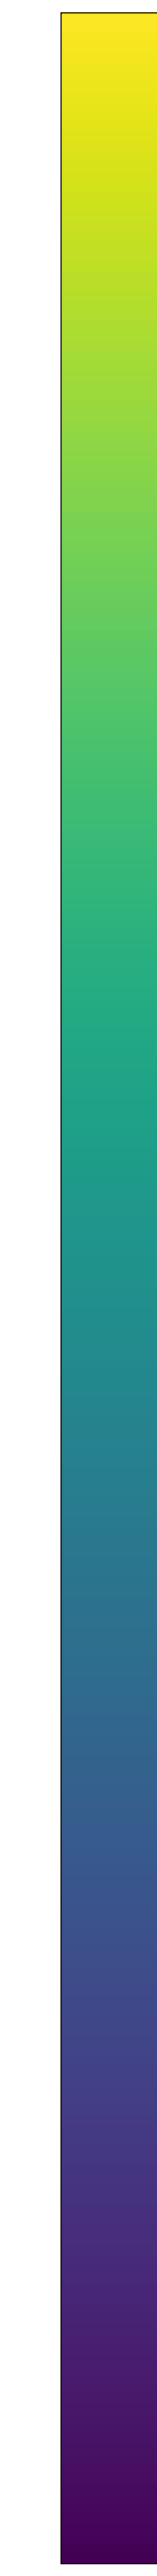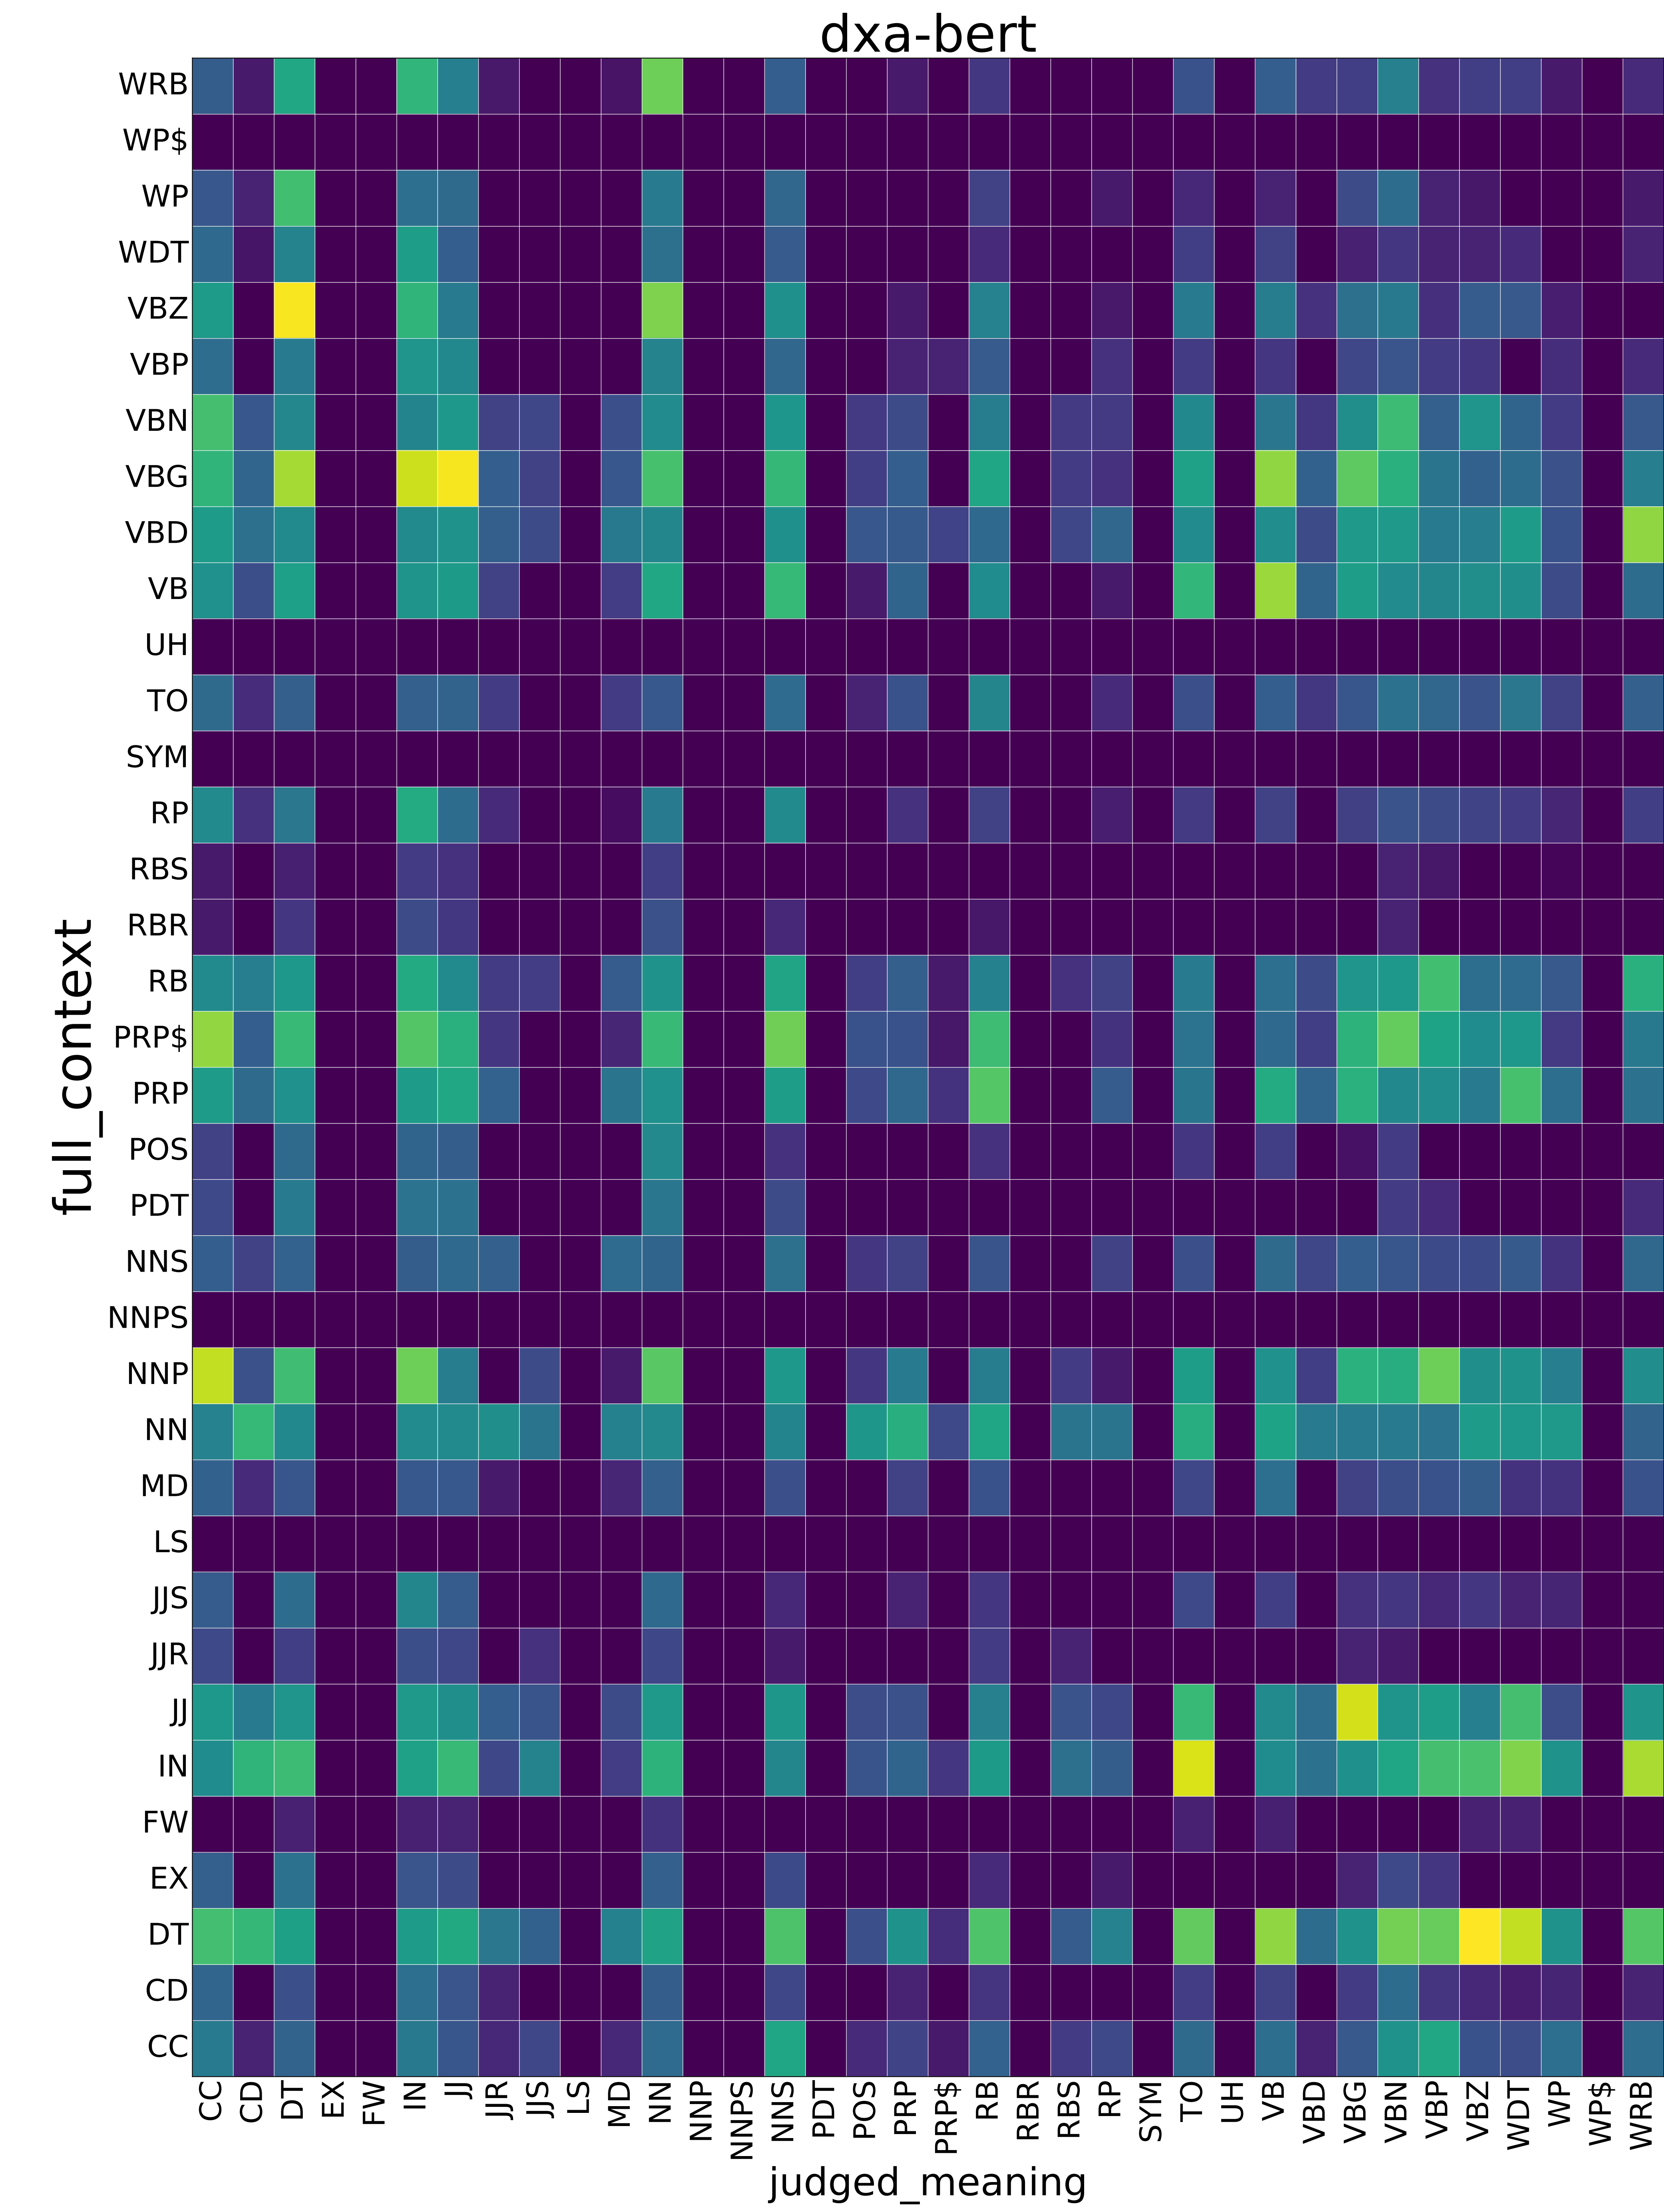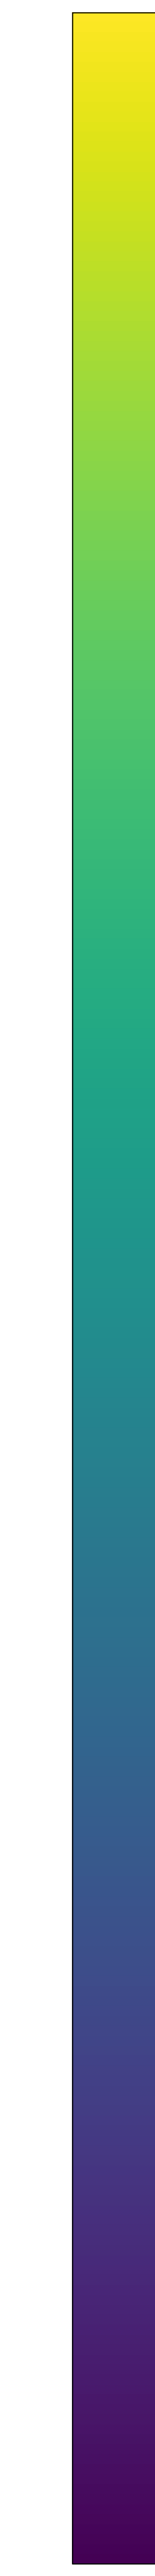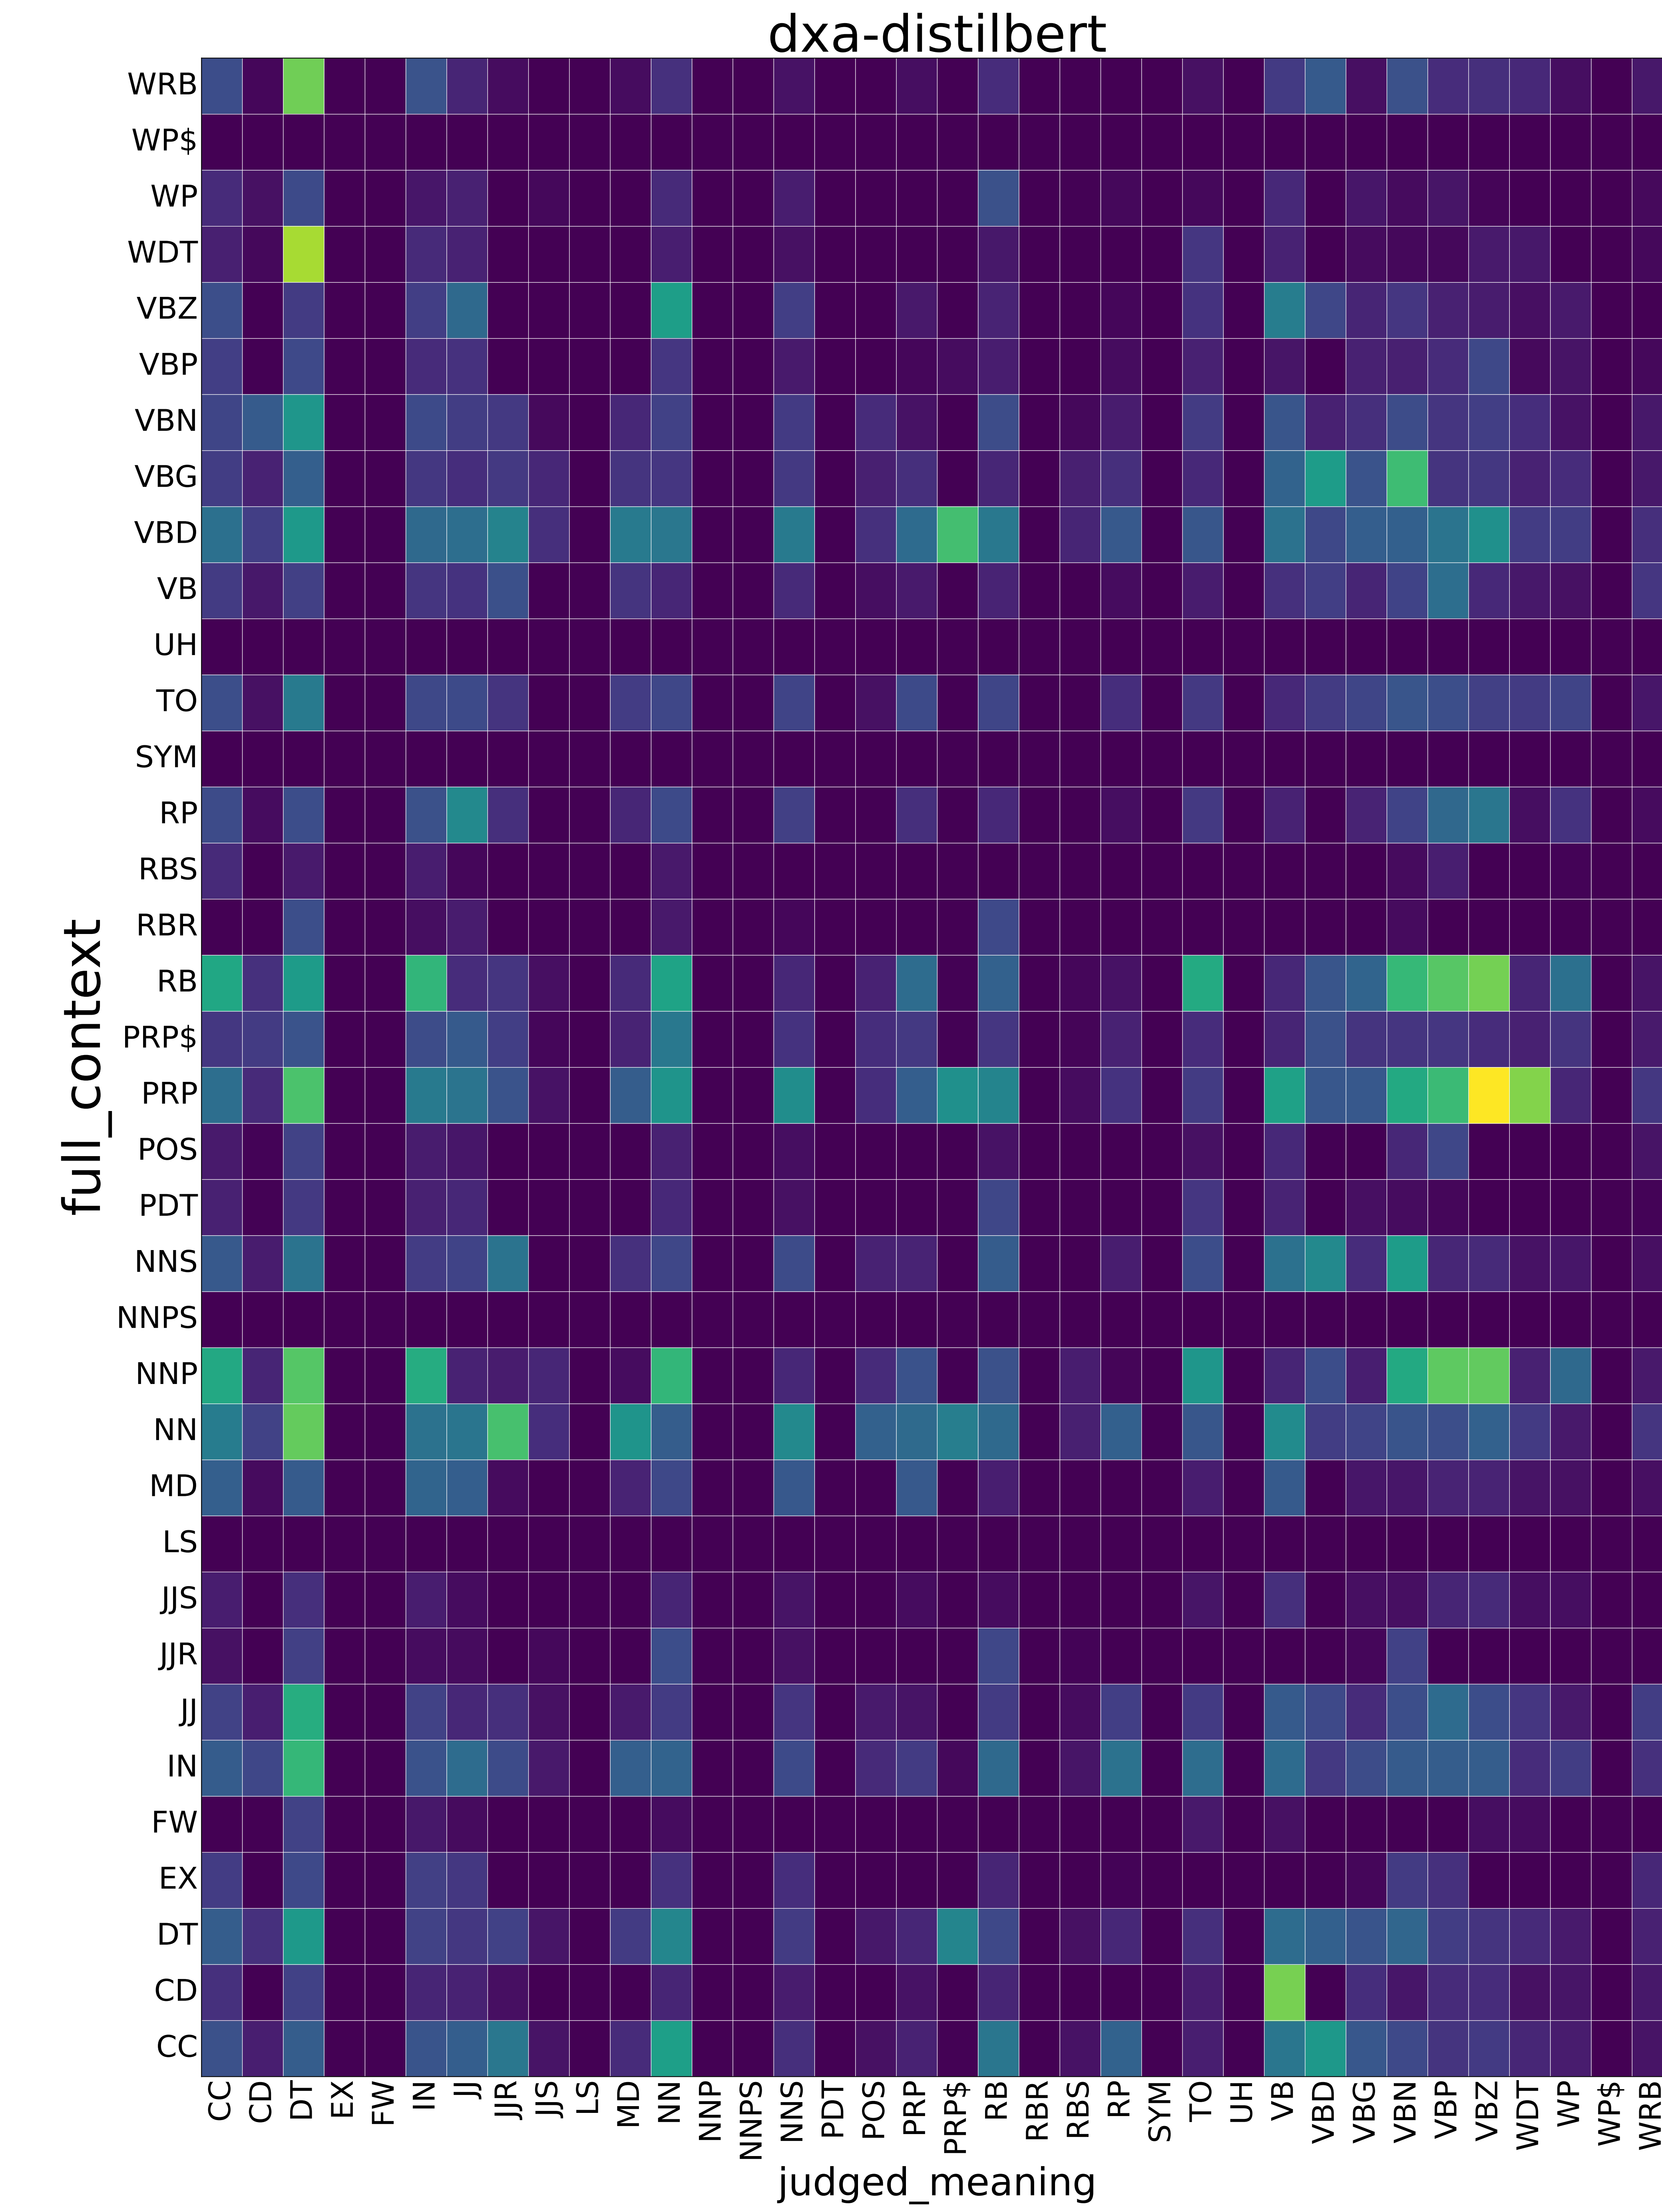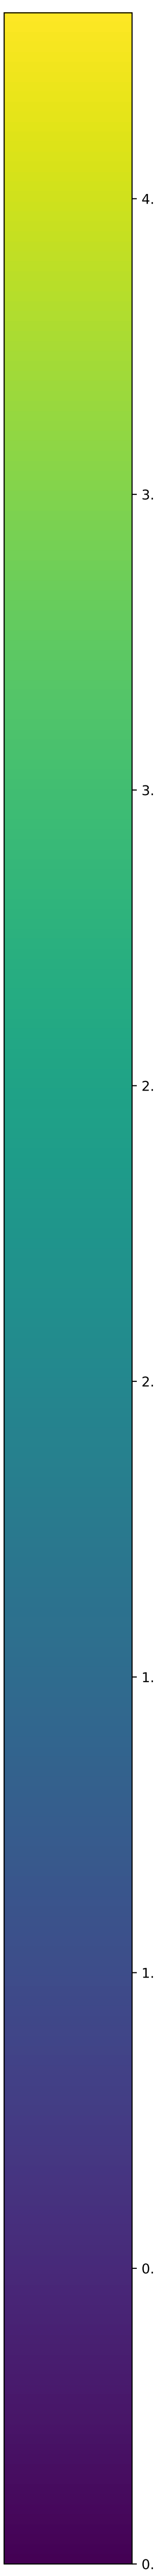

Supplement: SupplementaryMaterial [file dxa_cv_positive.pdf › figures/dxa_cv_positive.pdf]

Mean of <full\_context, judged\_meaning> Negative Example Pairs  
Similarity Scores for DXA

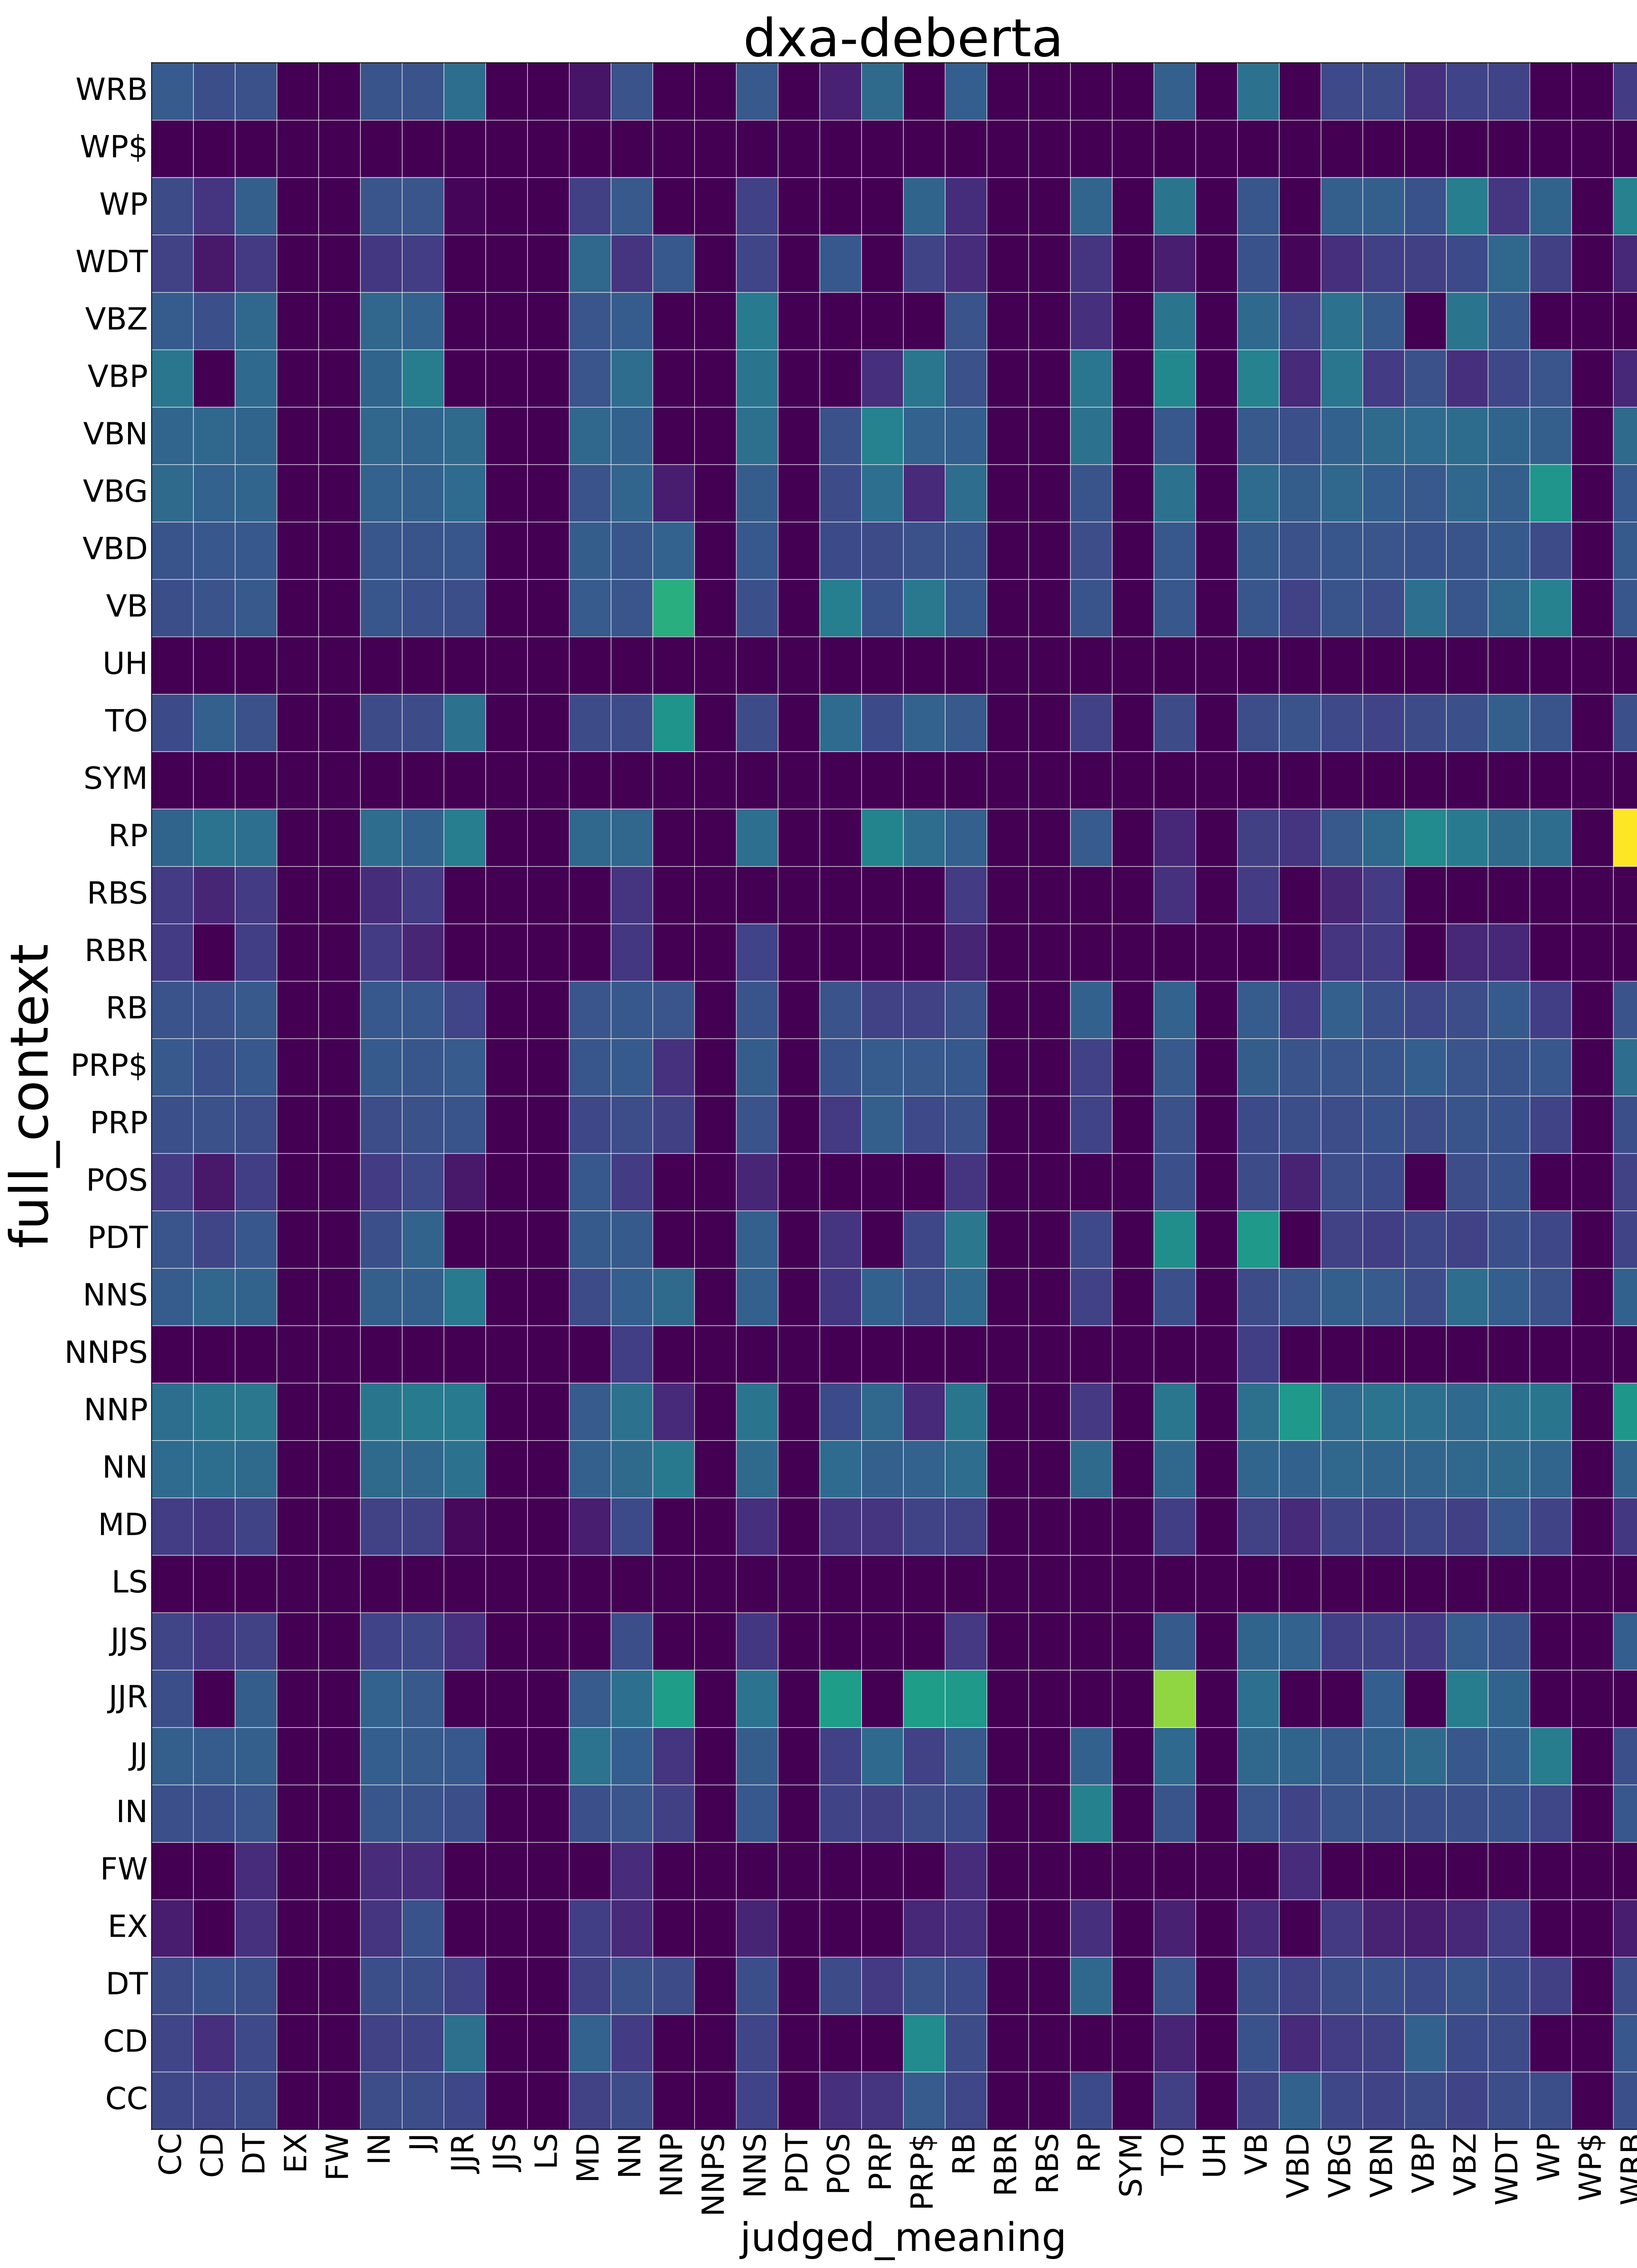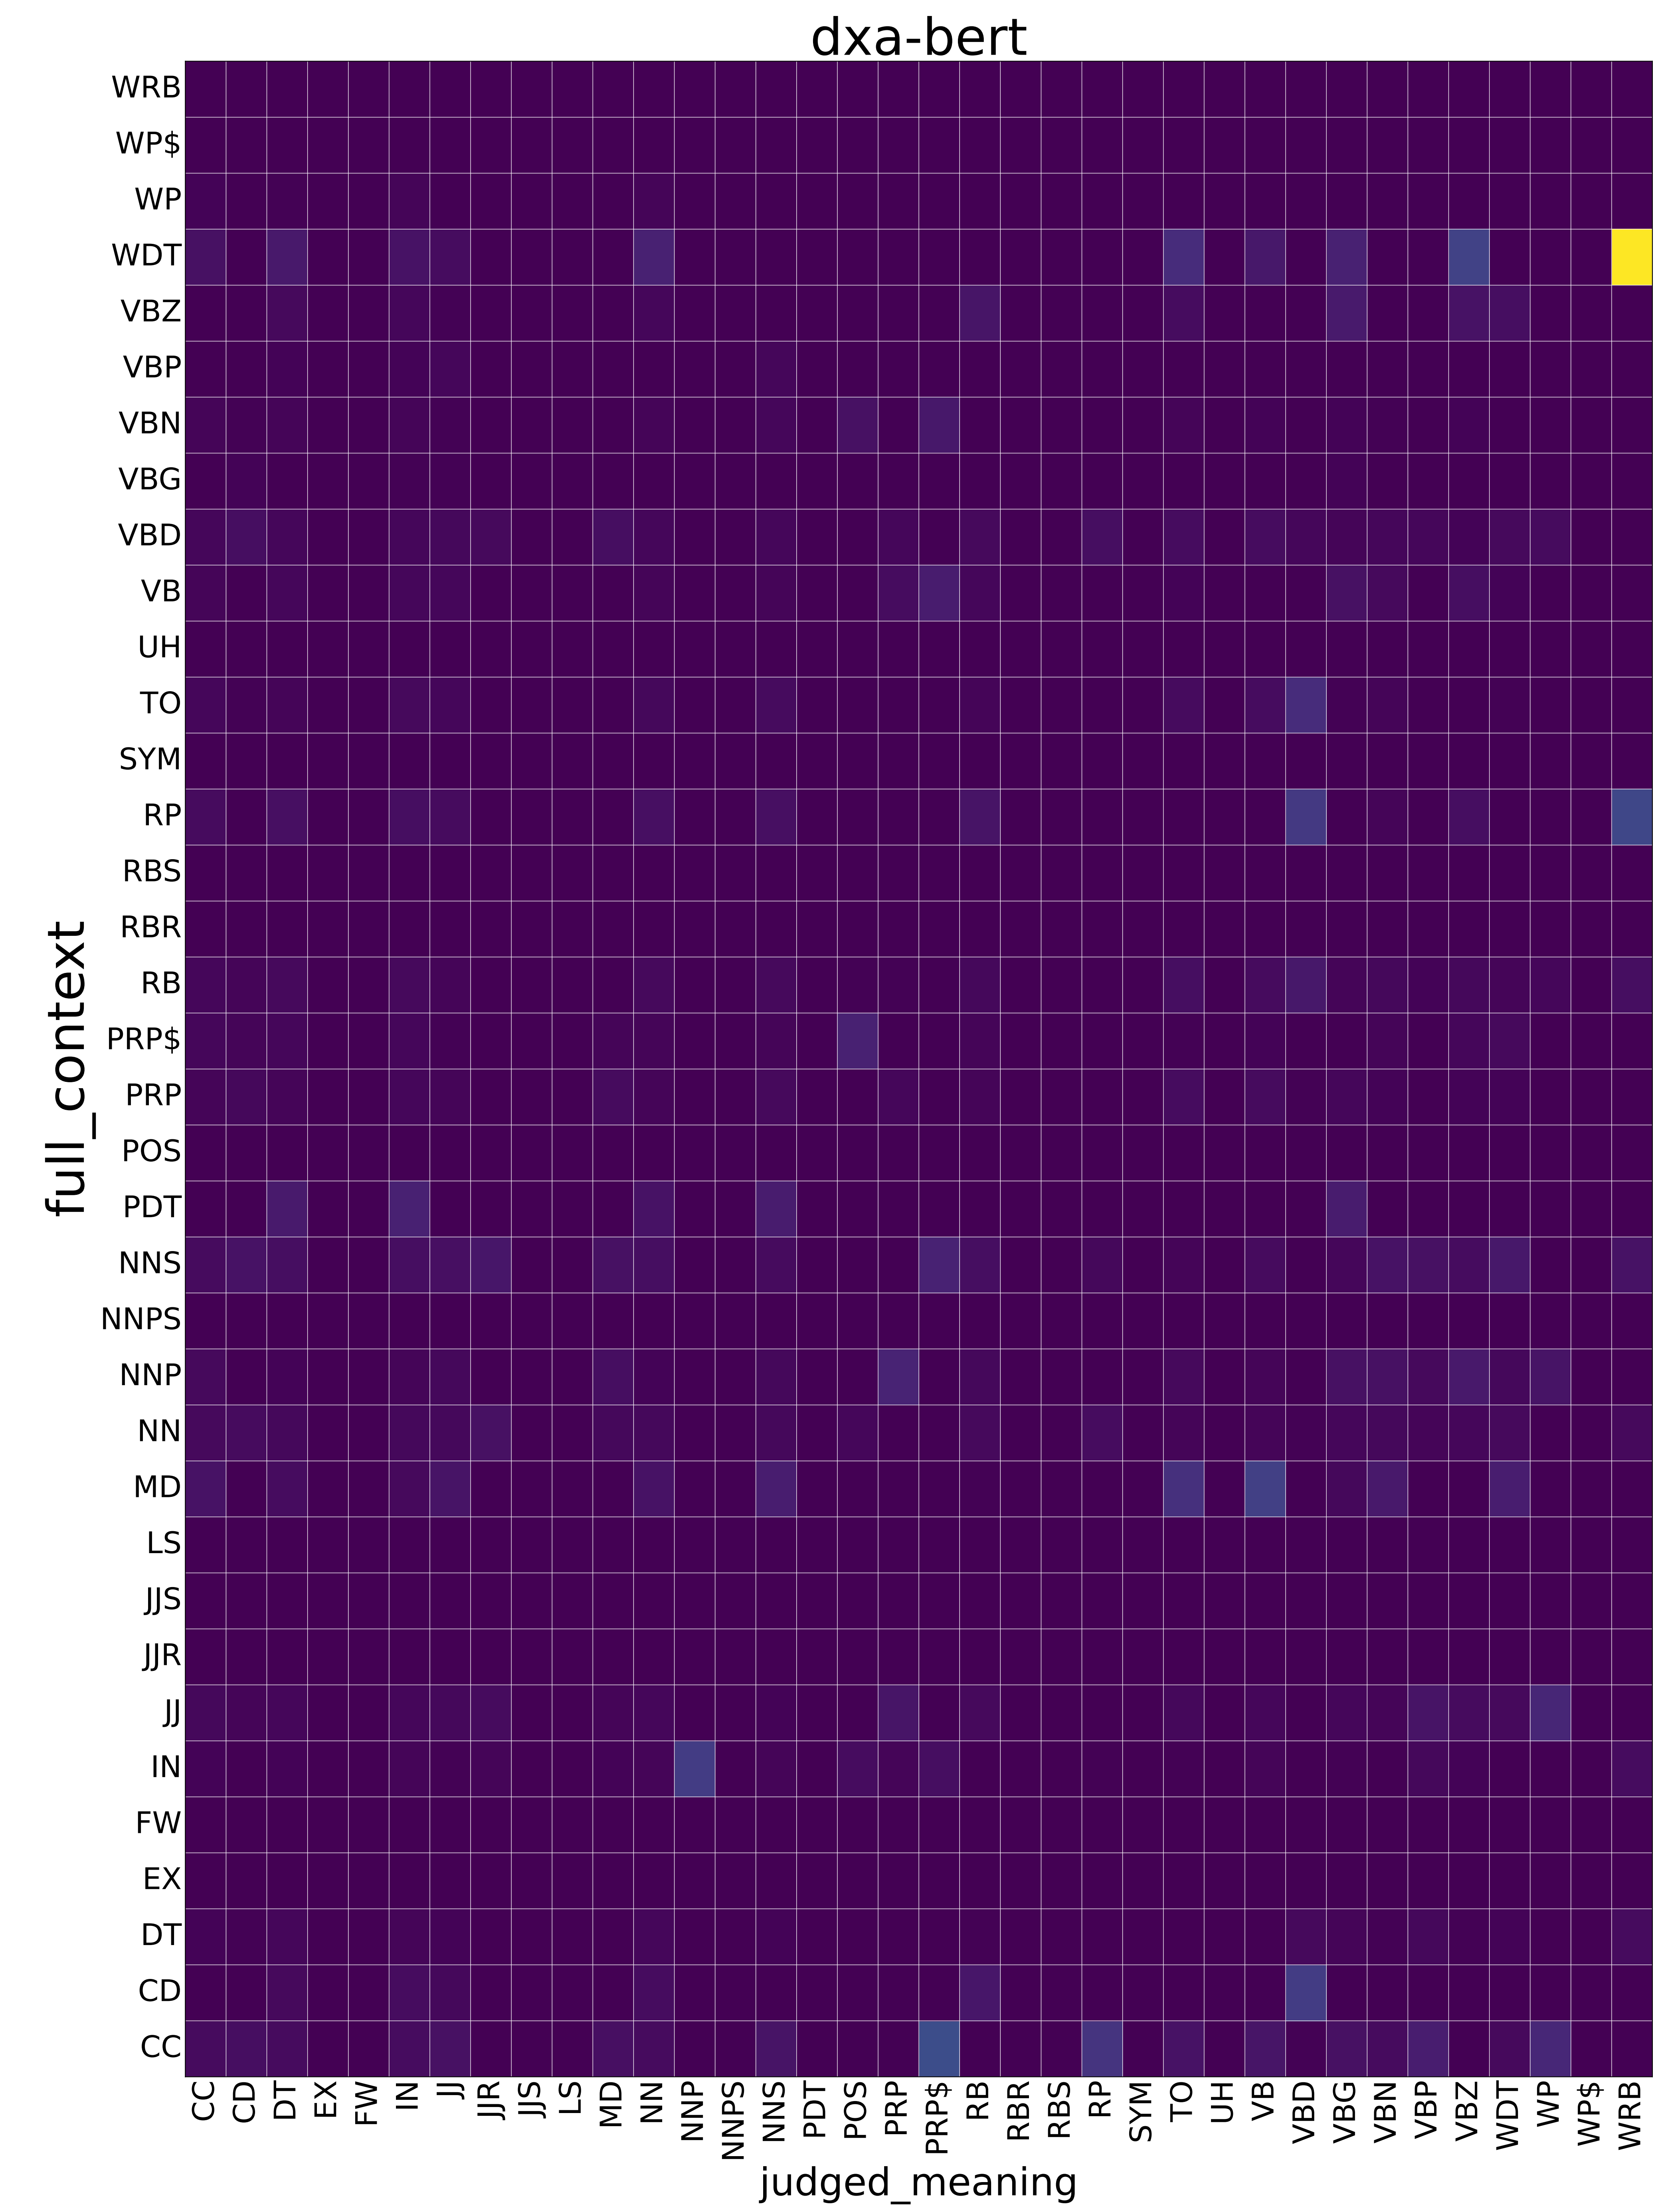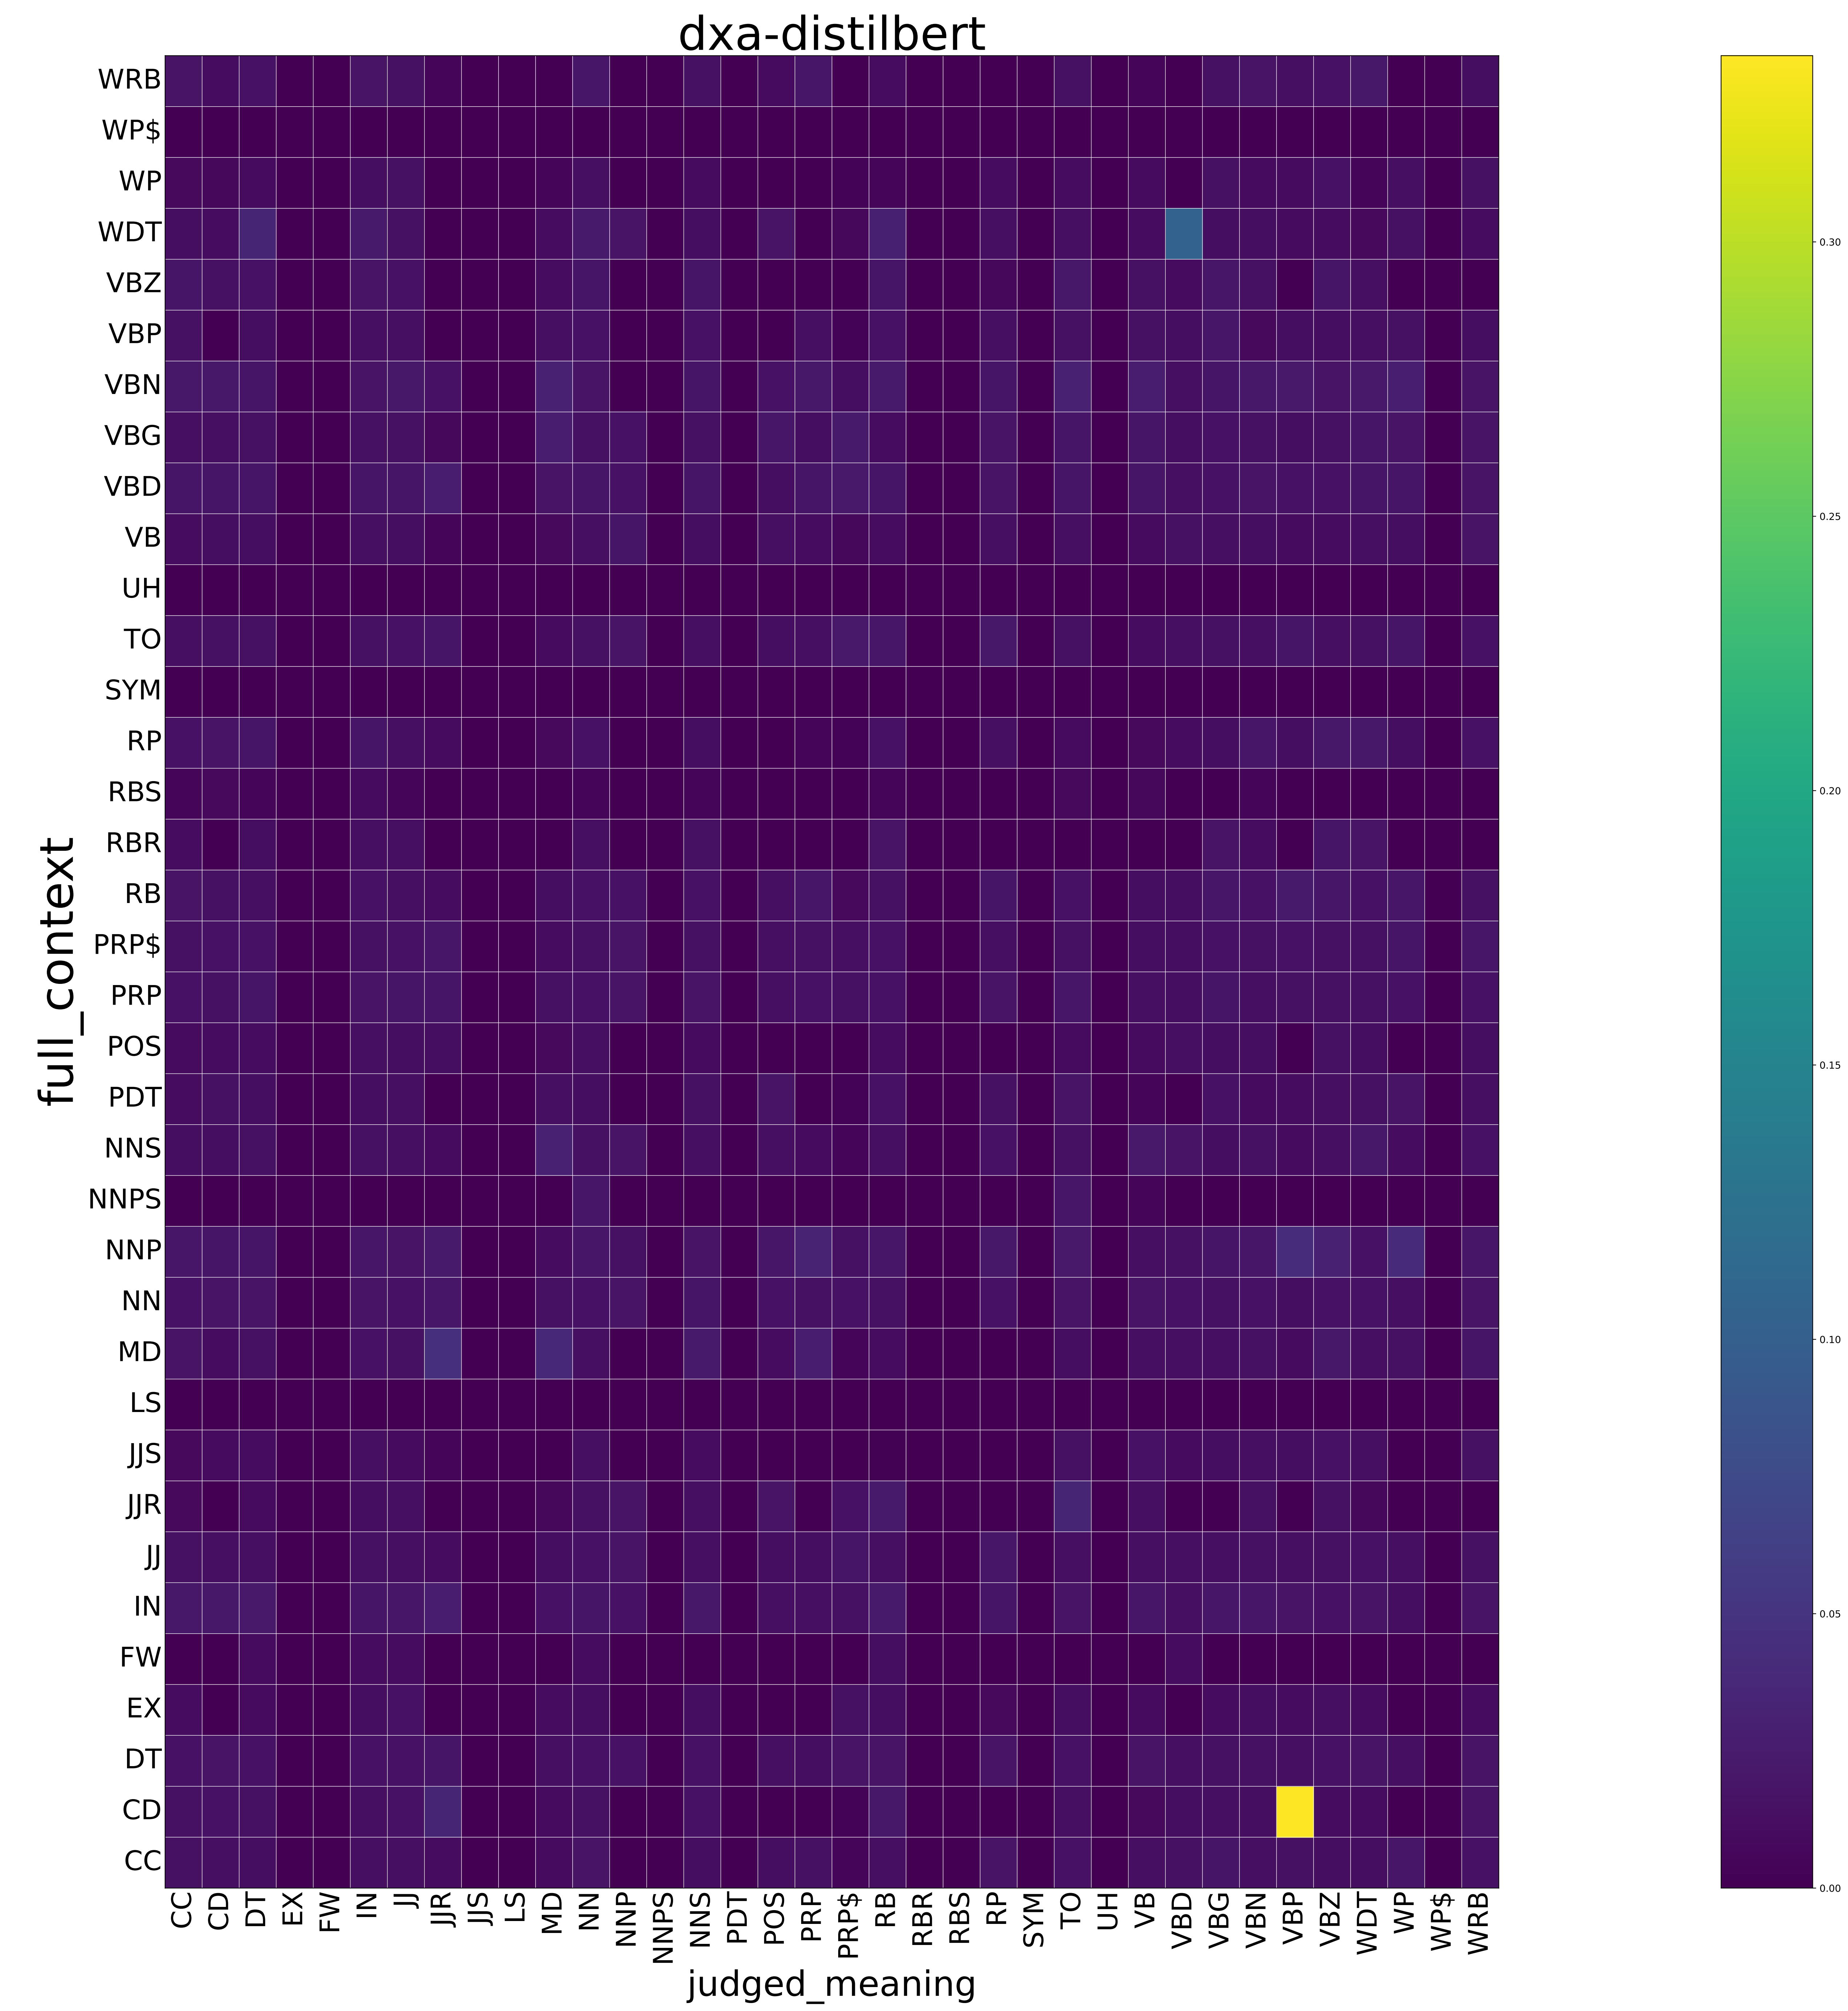

Supplement: SupplementaryMaterial [file dxa_mean_negative.pdf › figures/dxa_mean_negative.pdf]

Mean of <full\_context, judged\_meaning> Neutral Example Pairs  
Similarity Scores for DXA

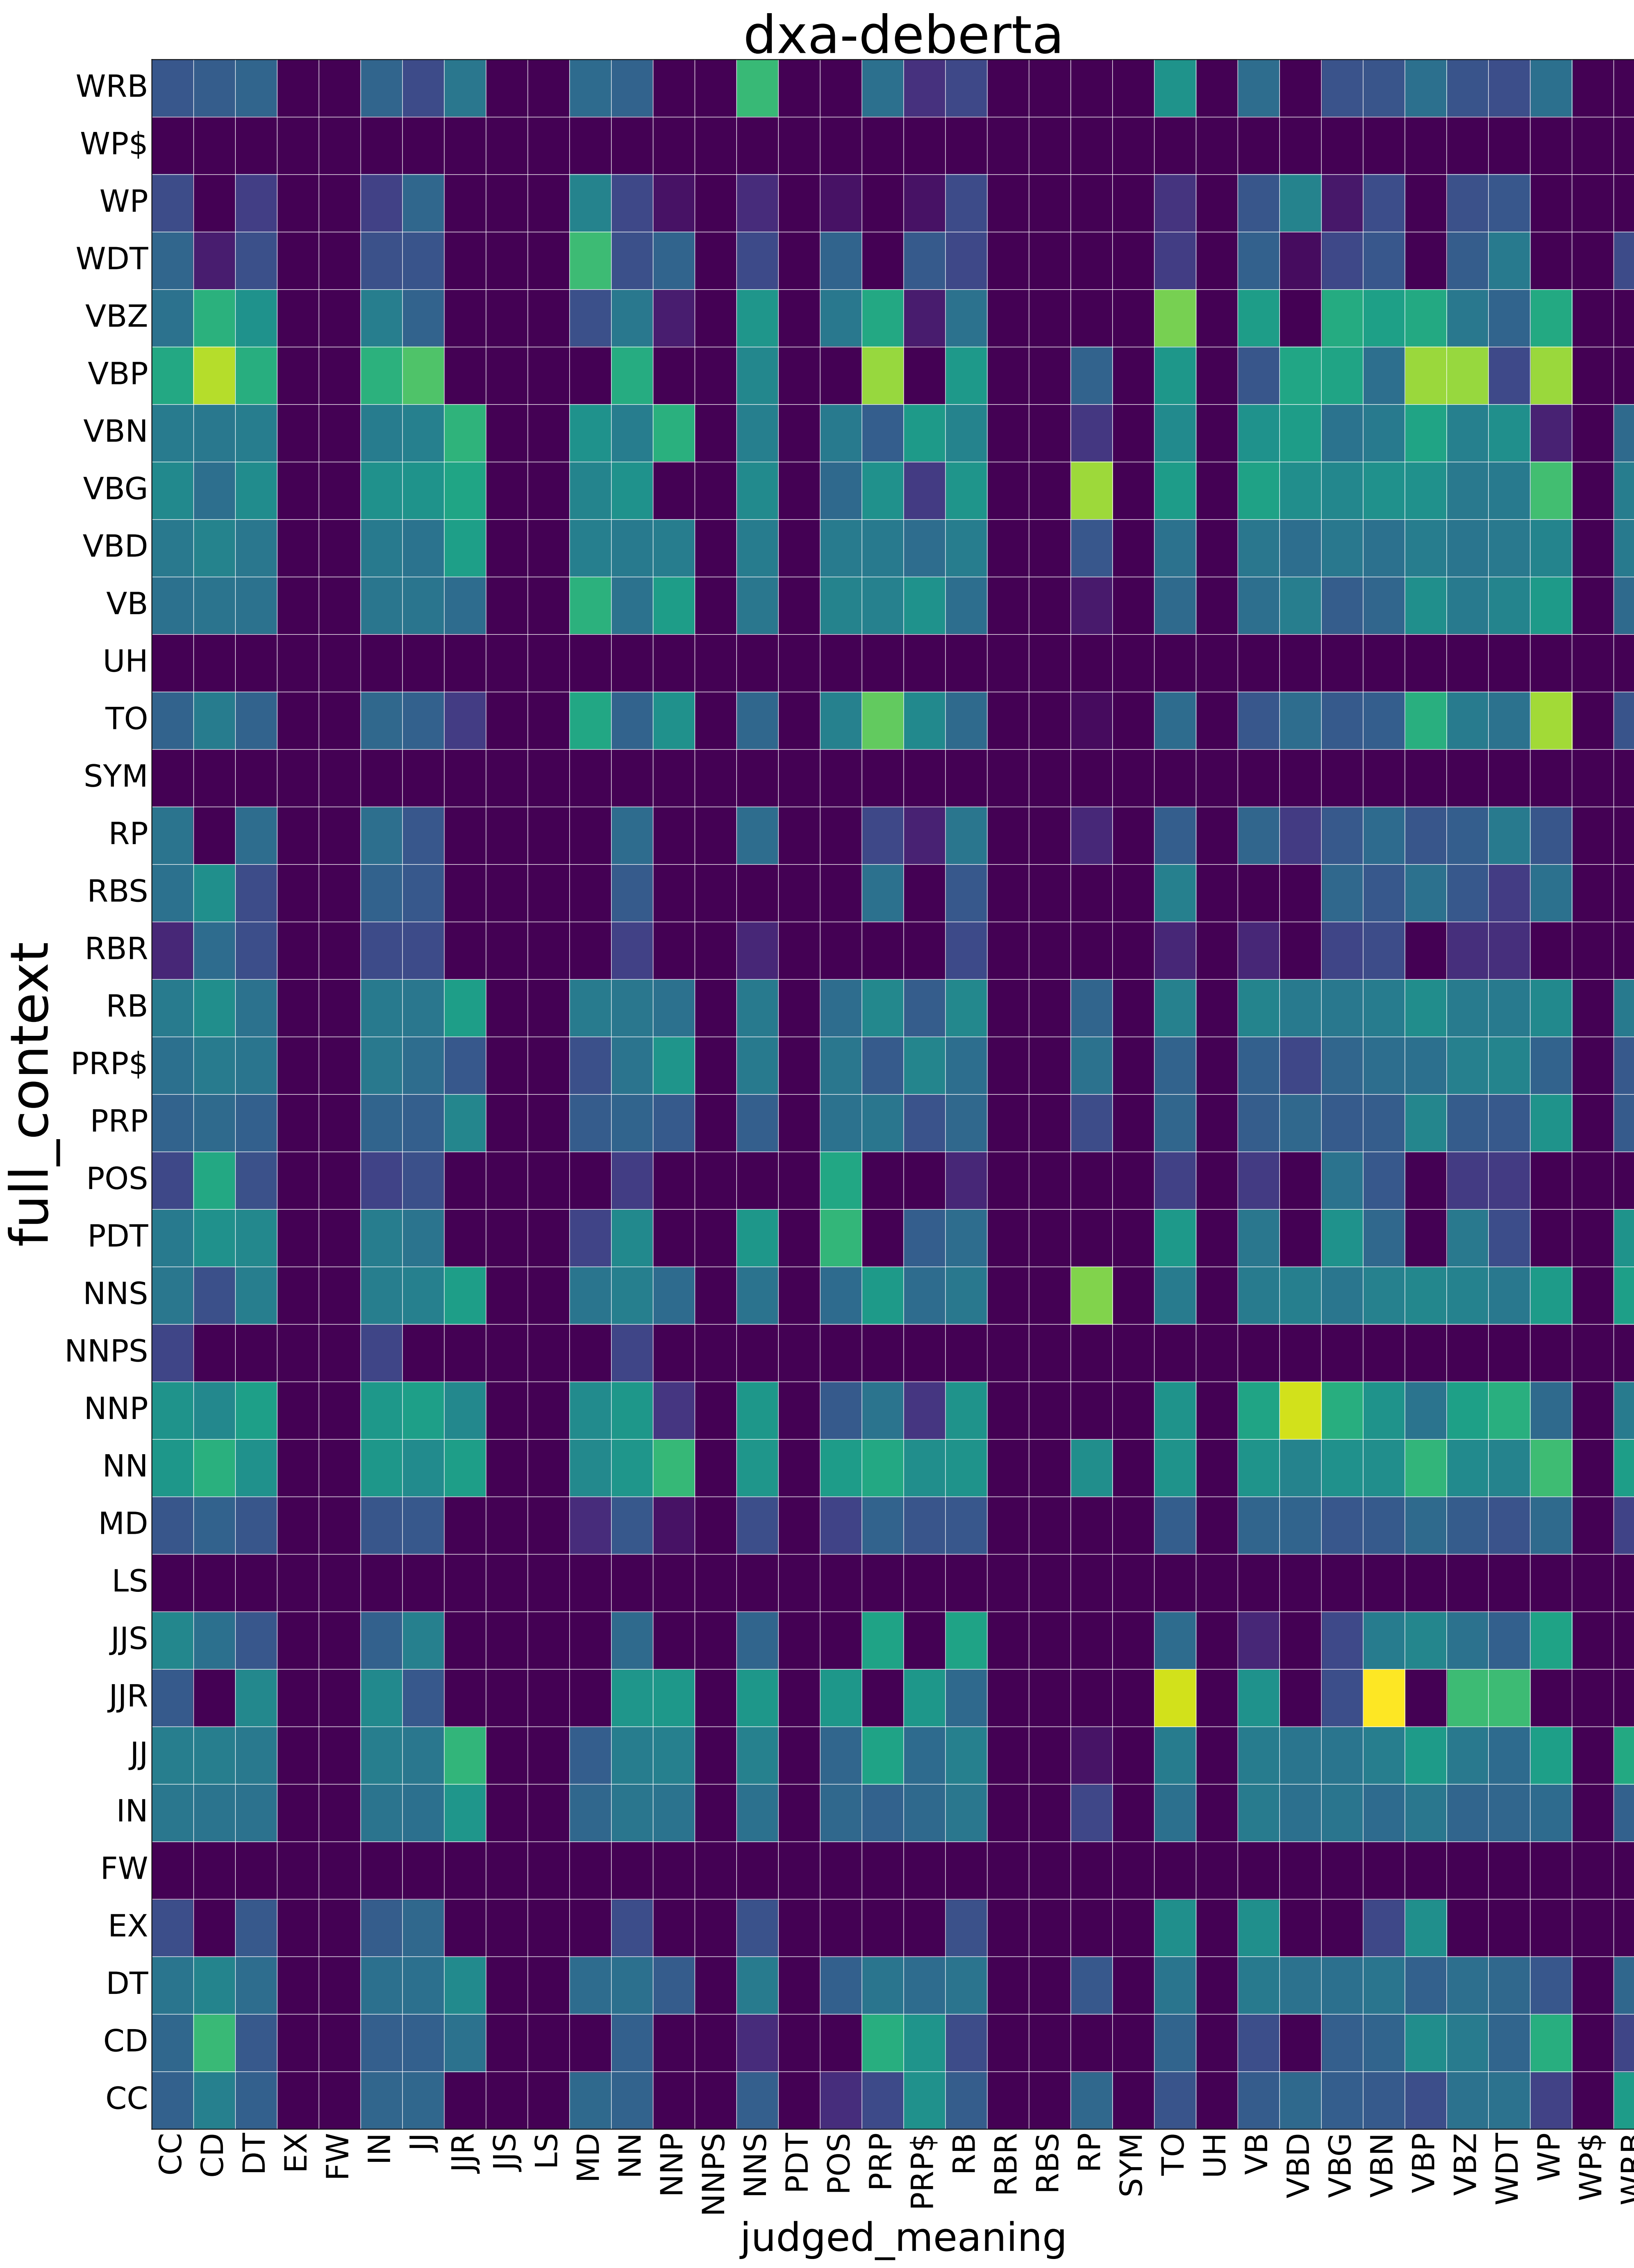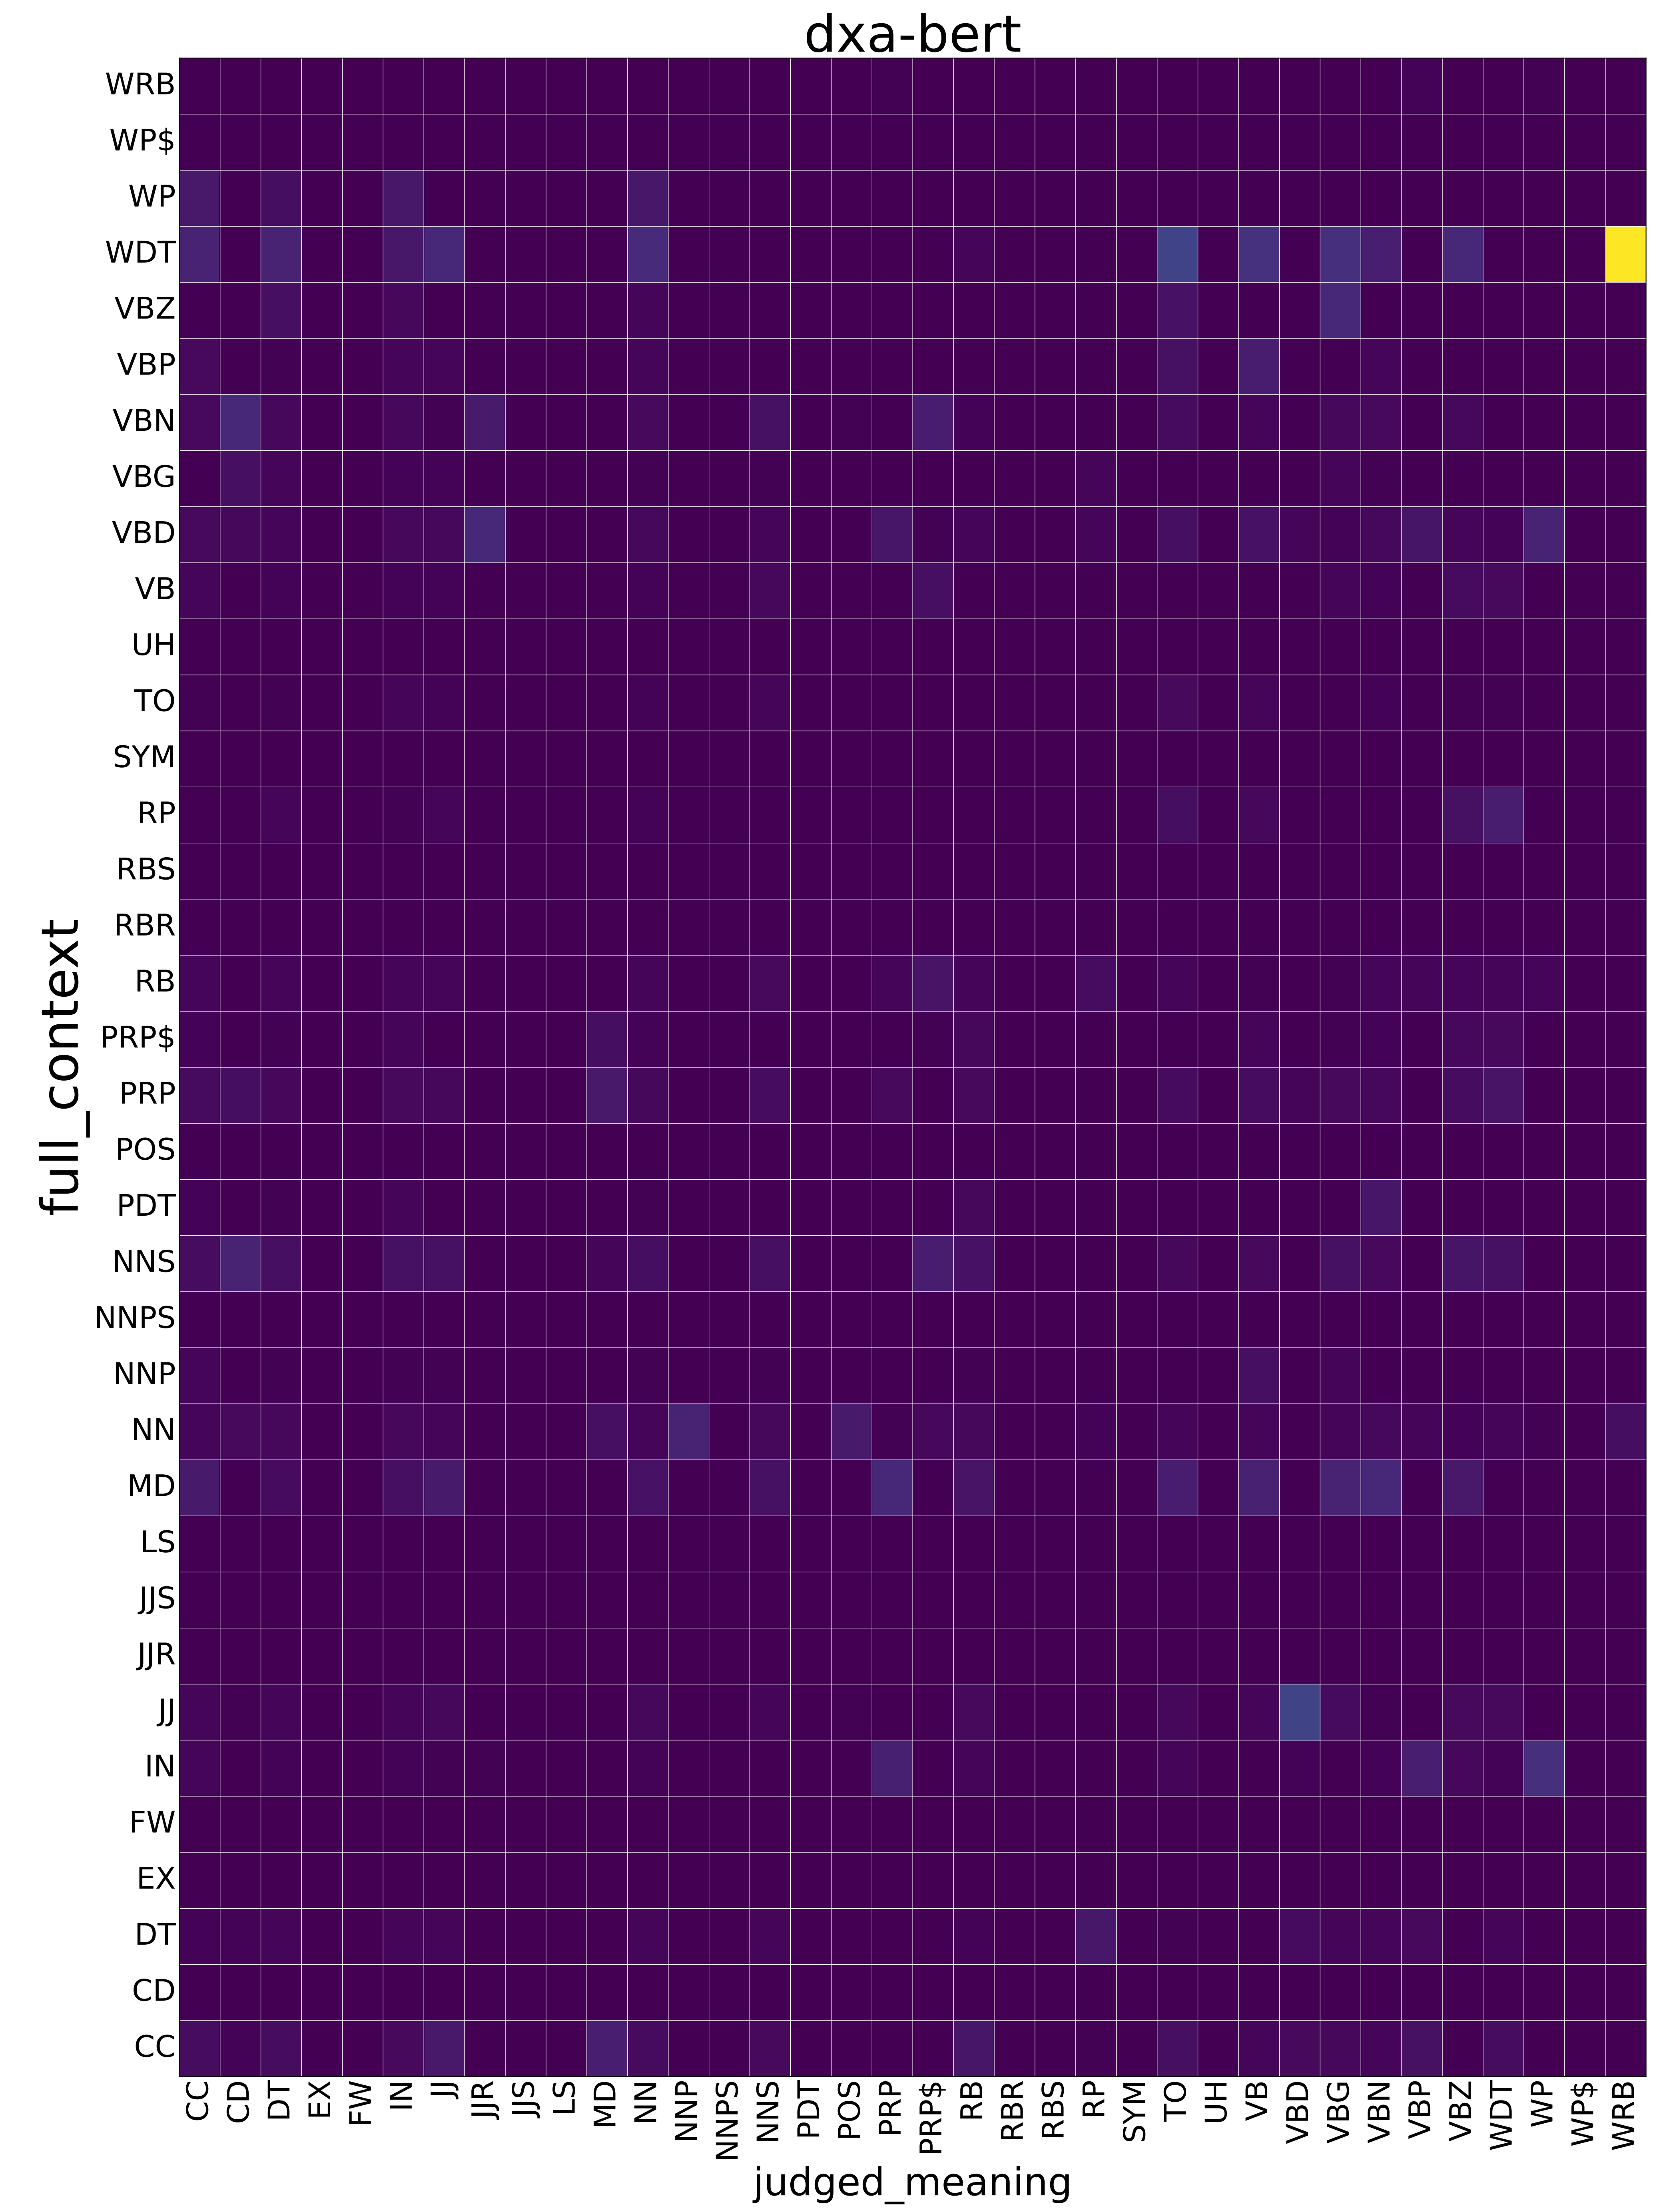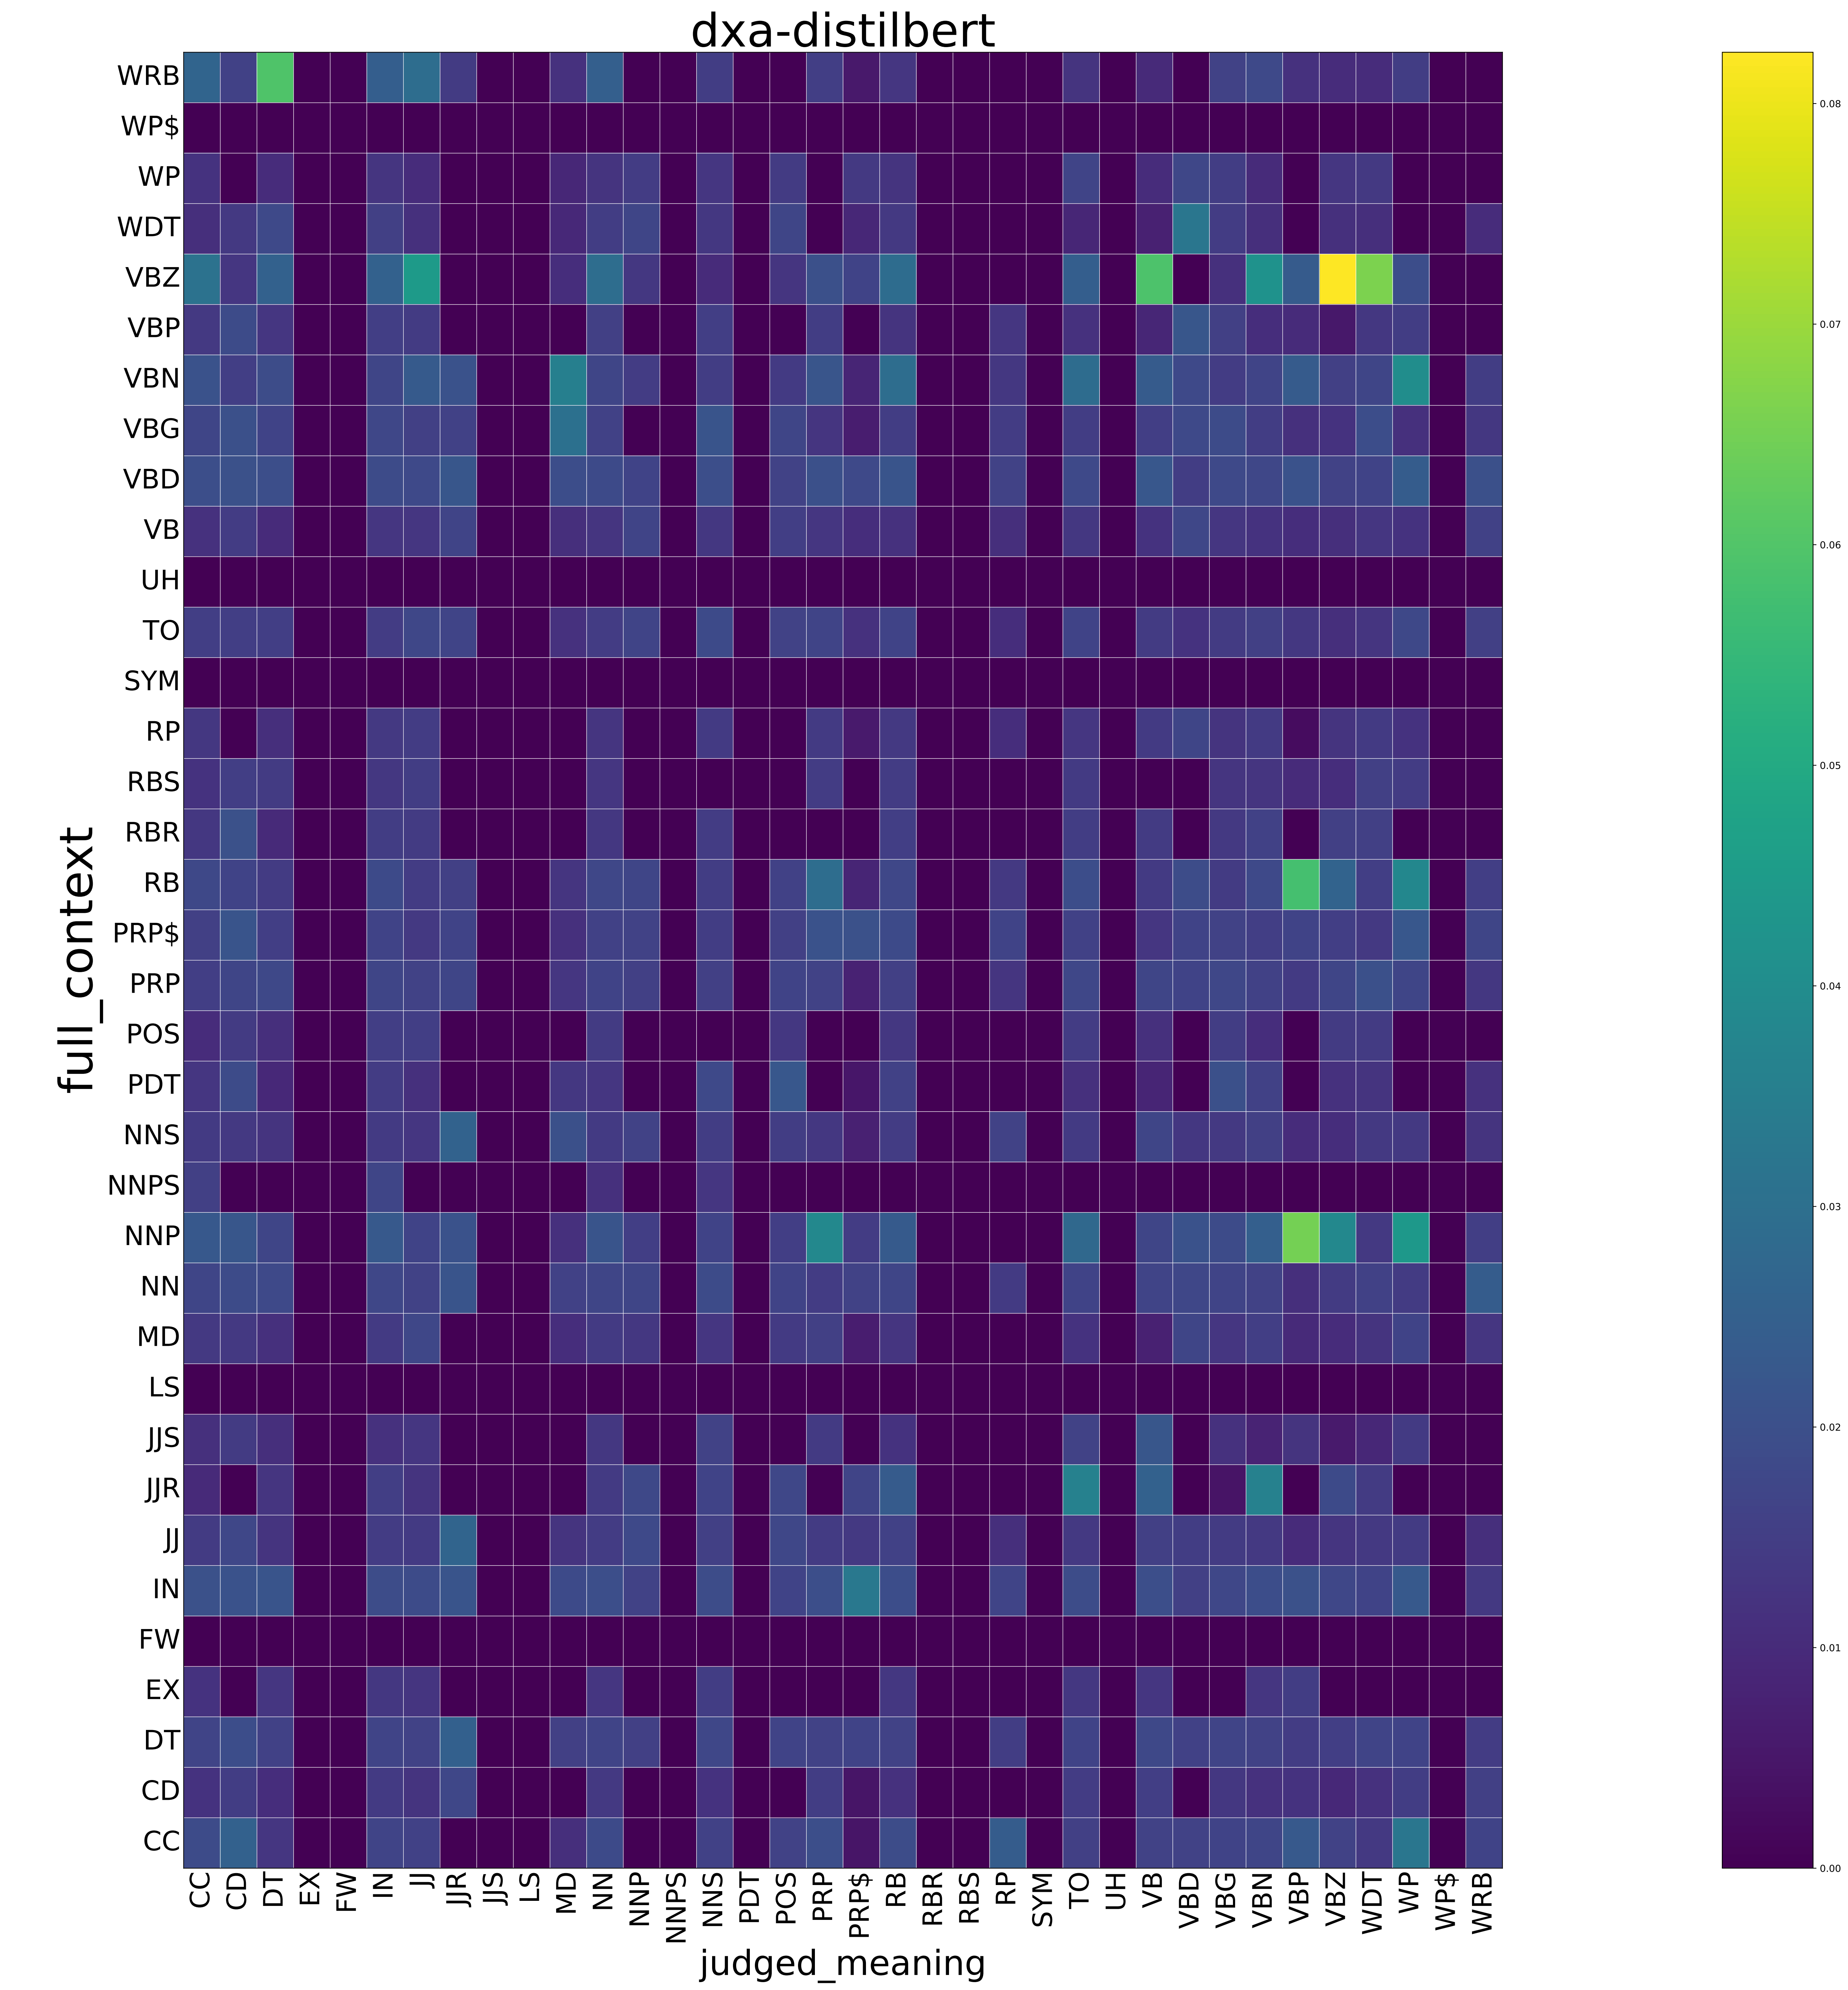

Supplement: SupplementaryMaterial [file dxa_mean_neutral.pdf › figures/dxa_mean_neutral.pdf]

Mean of <full\_context, judged\_meaning> Positive Example Pairs  
Similarity Scores for DXA

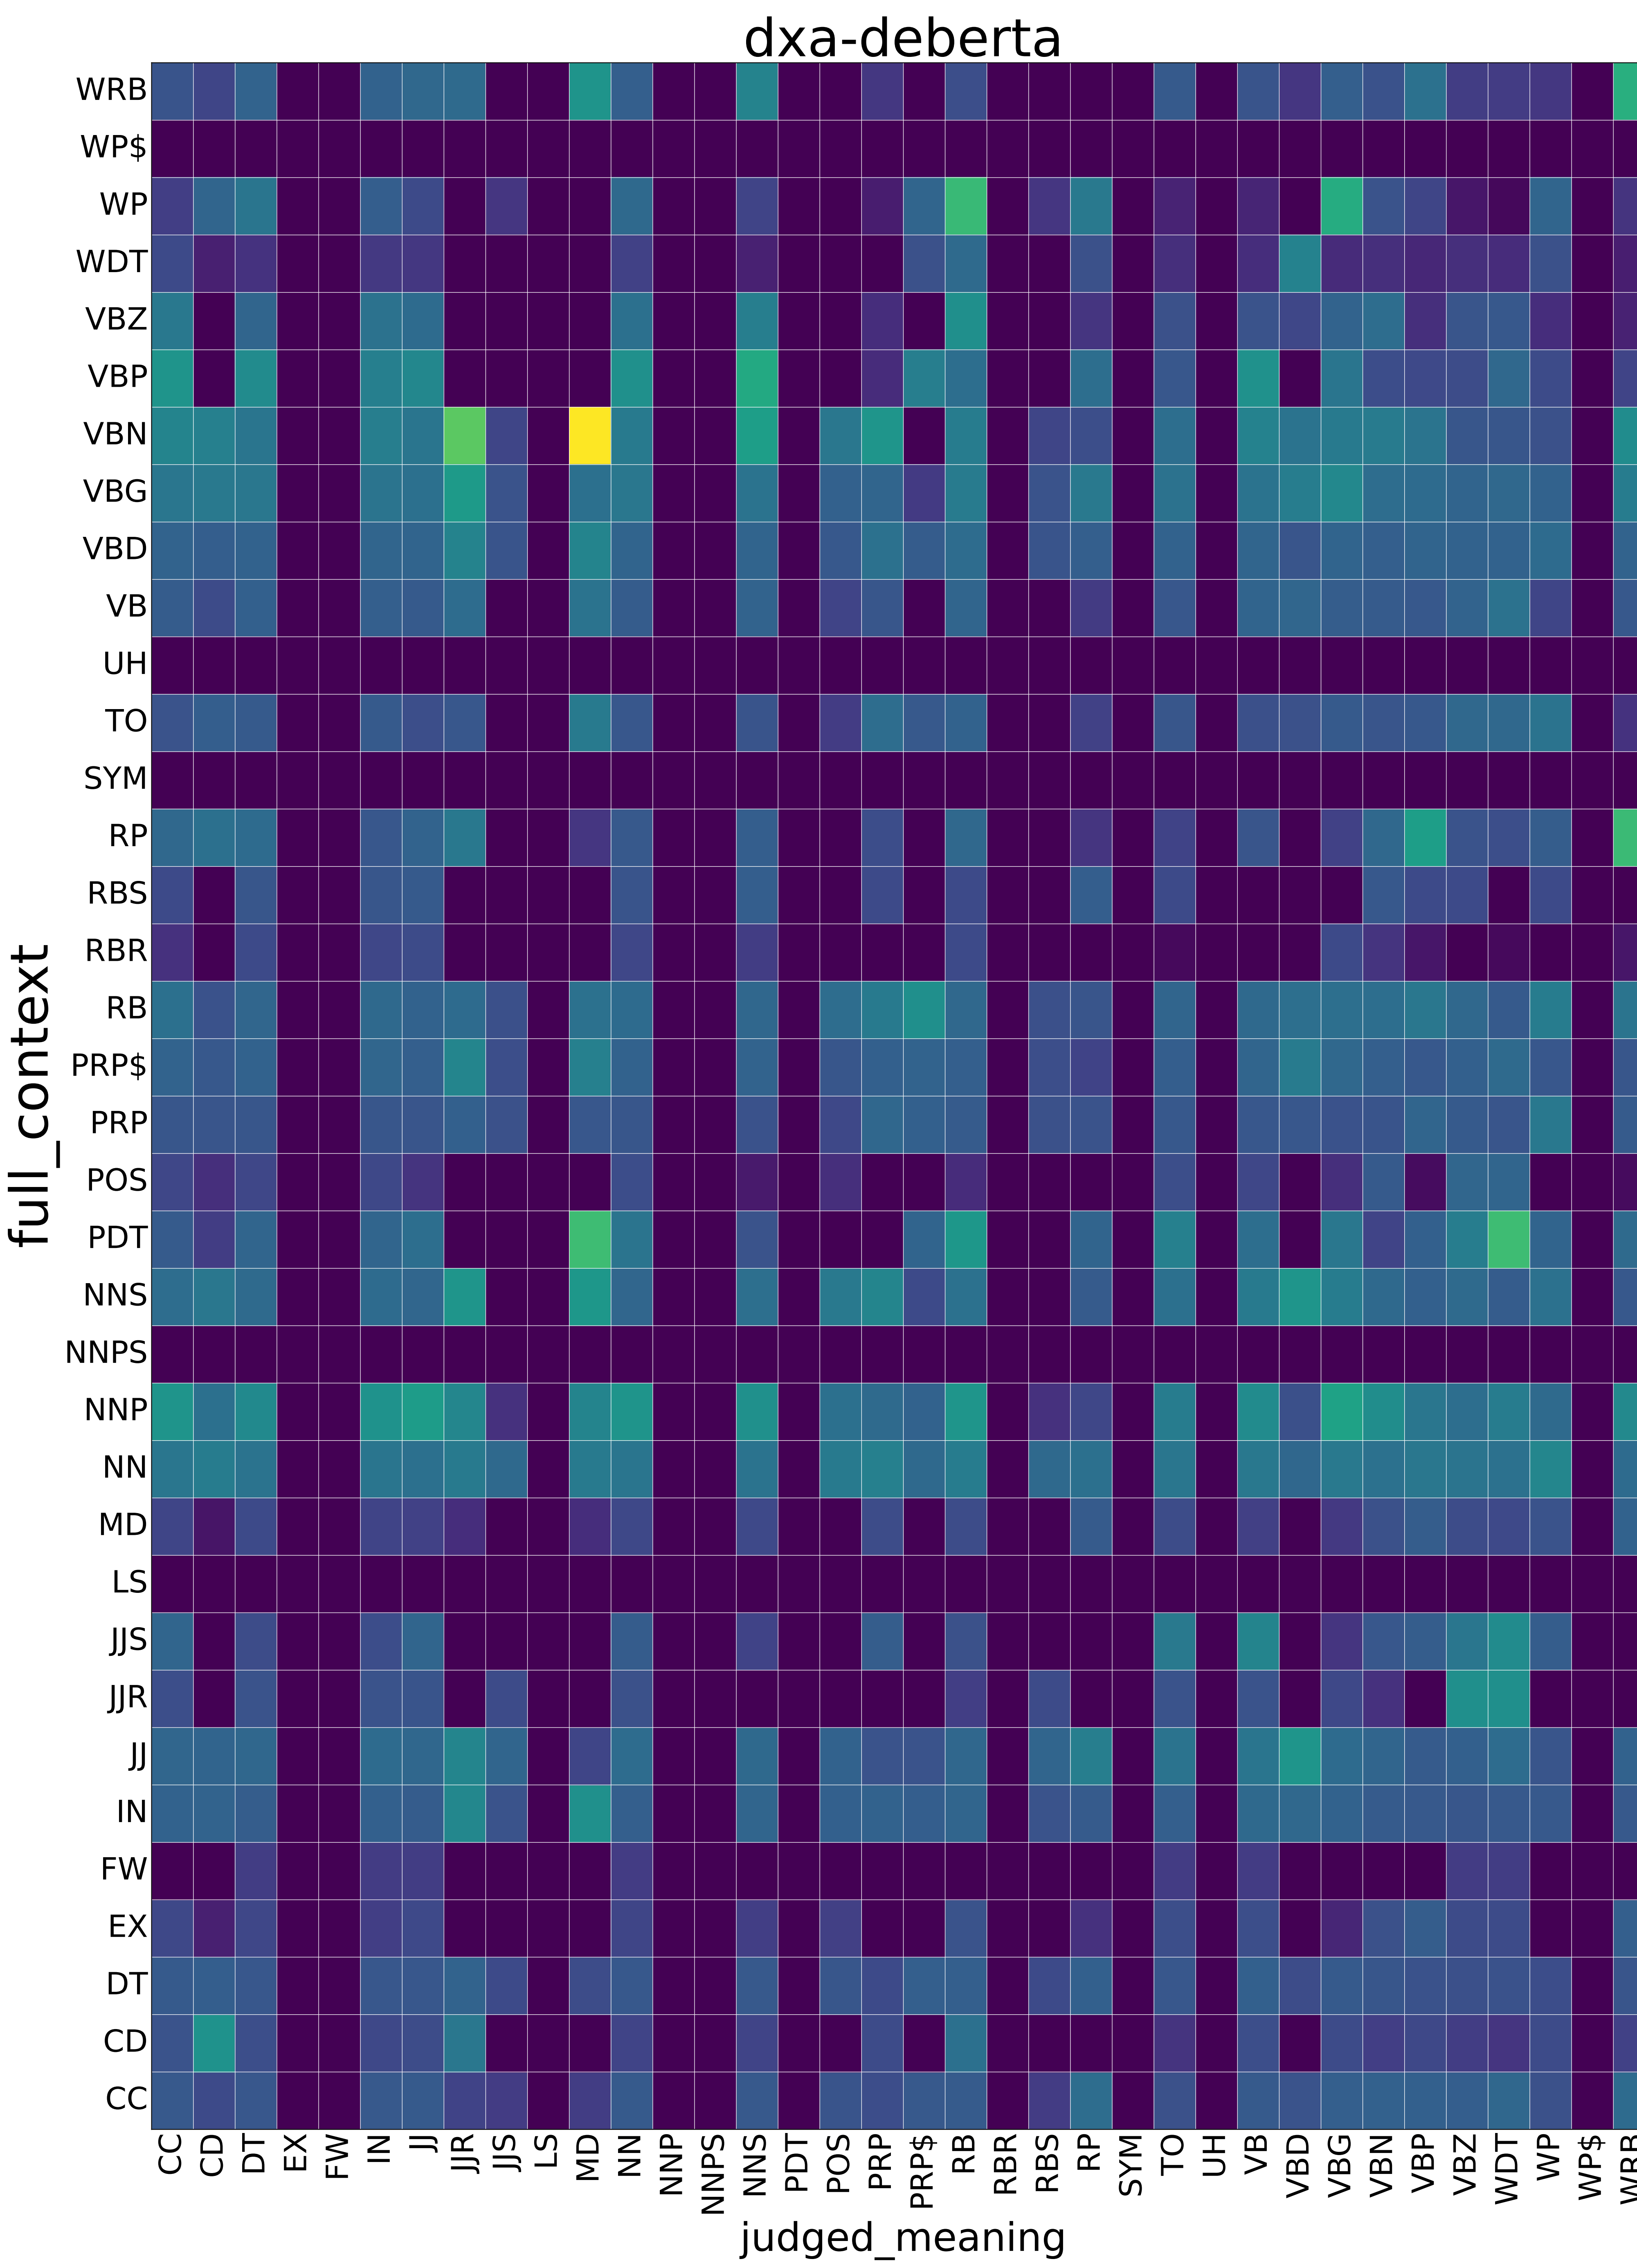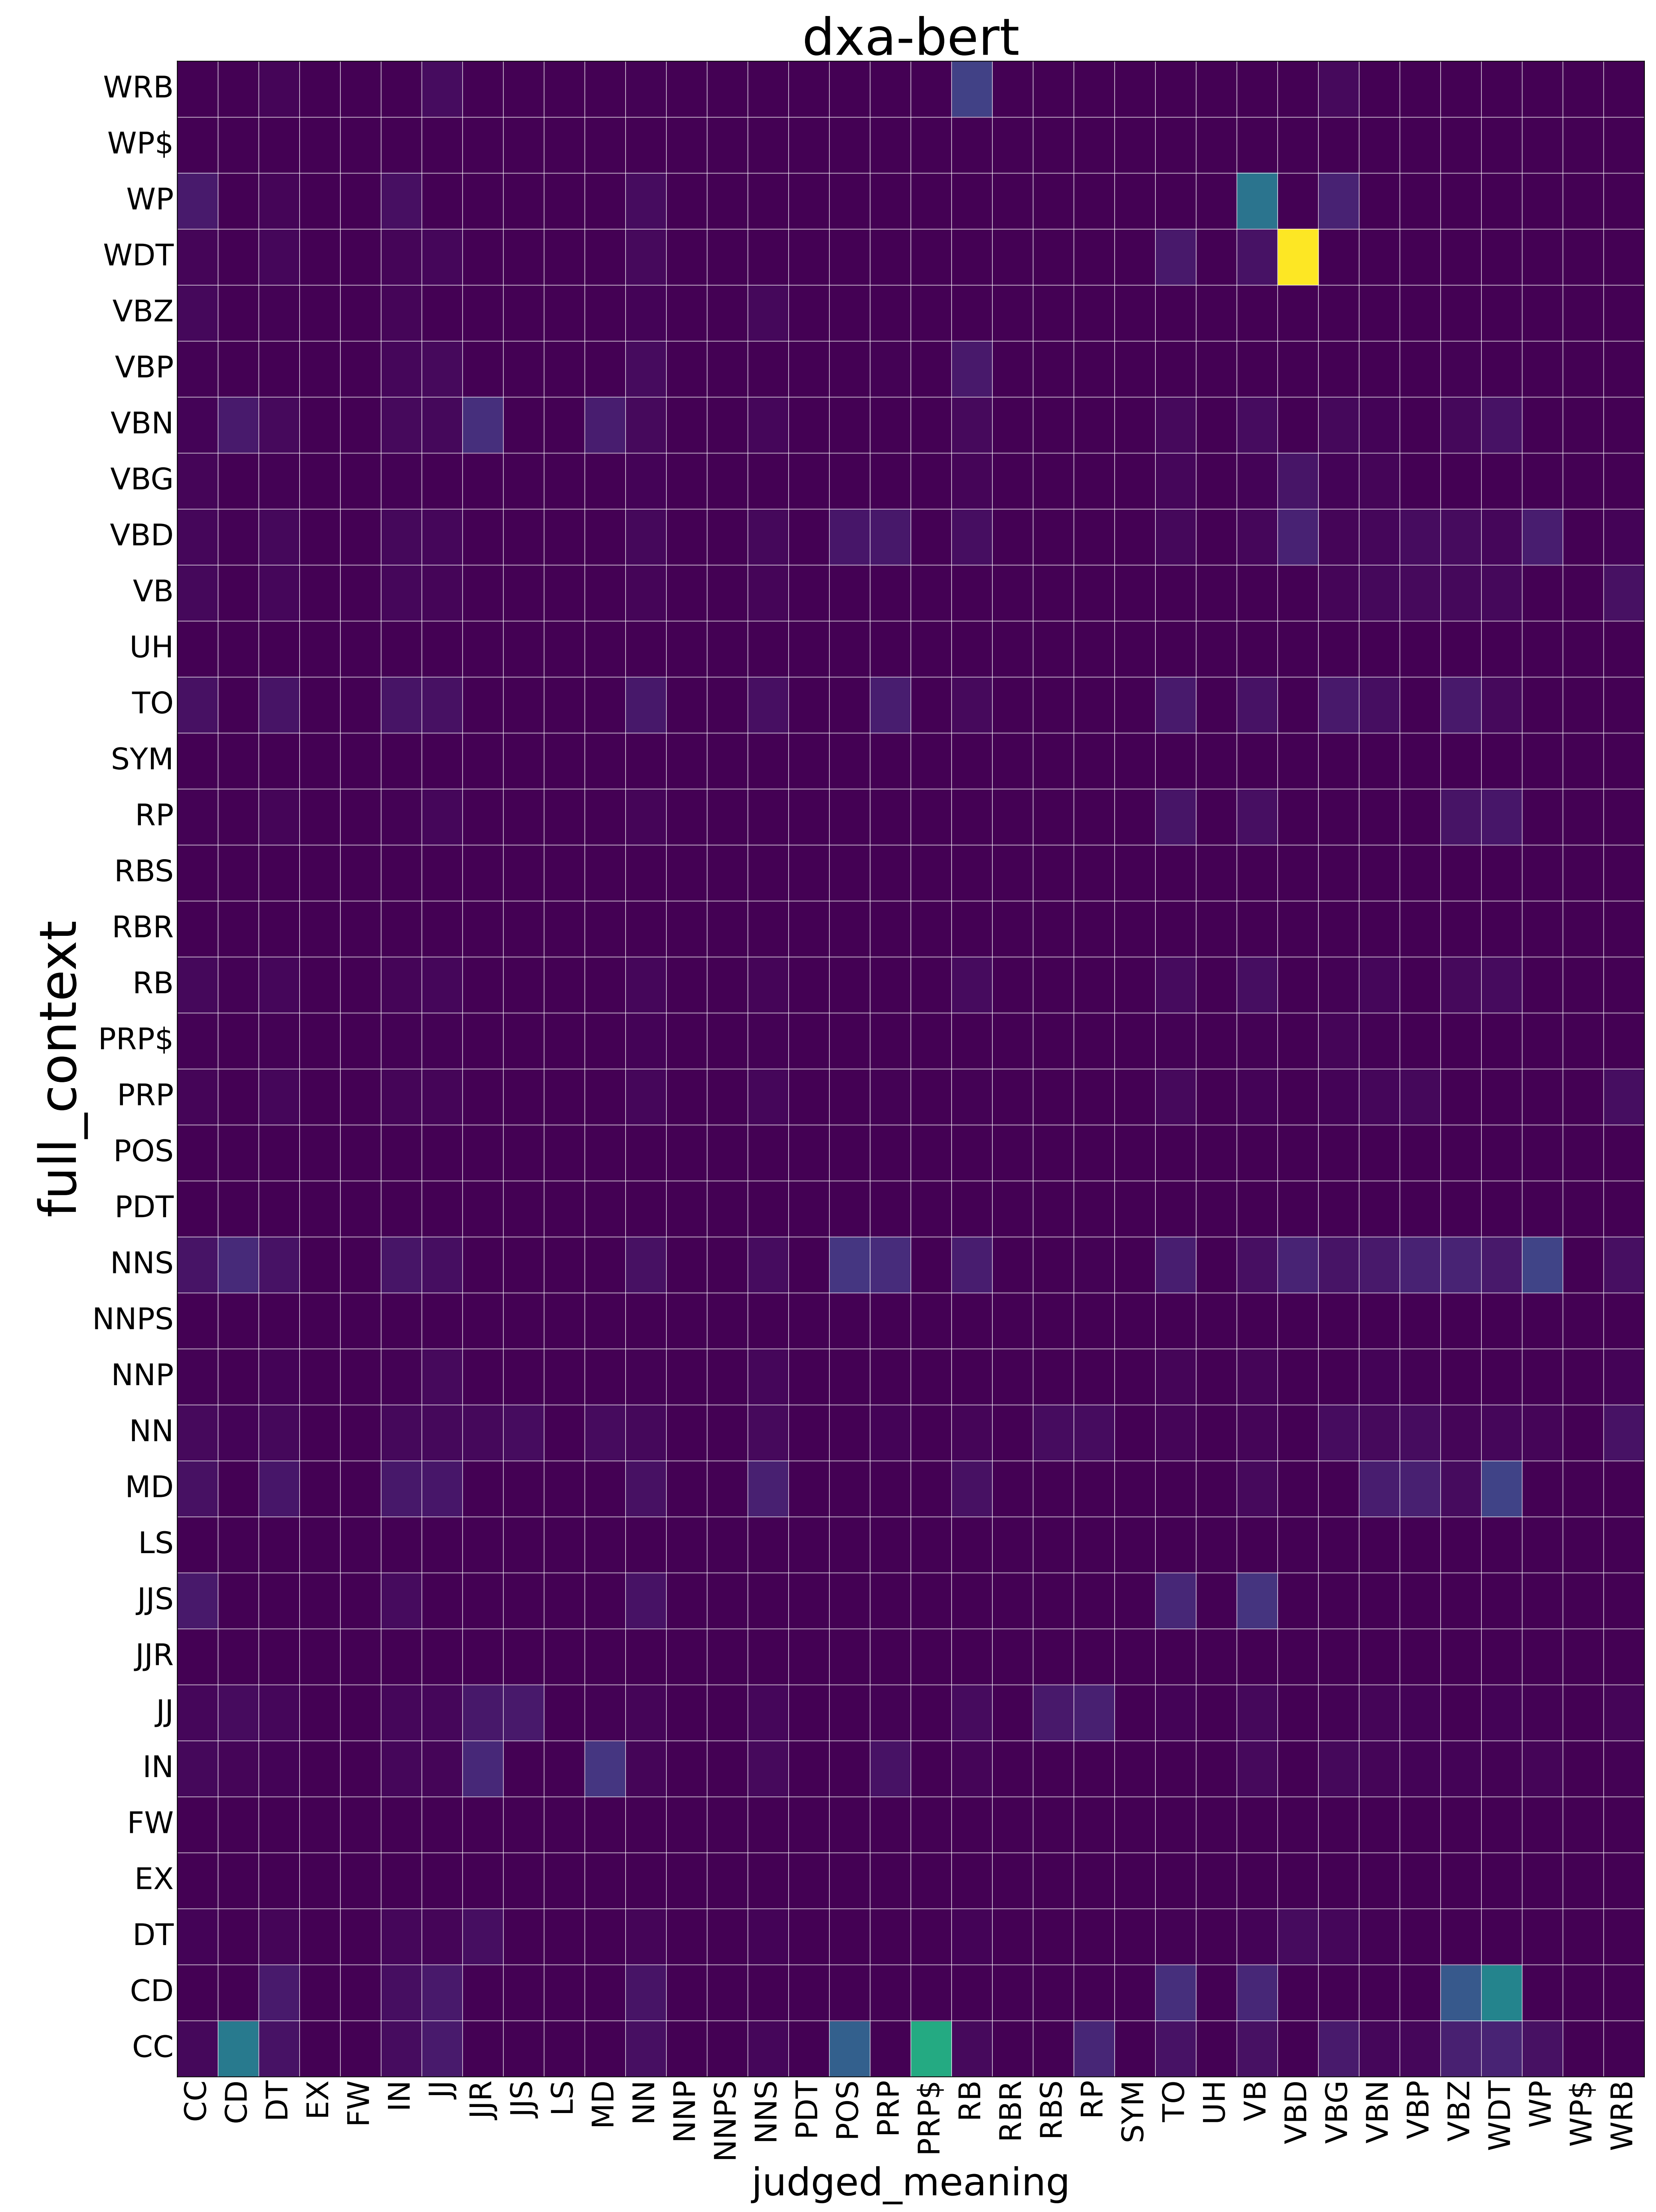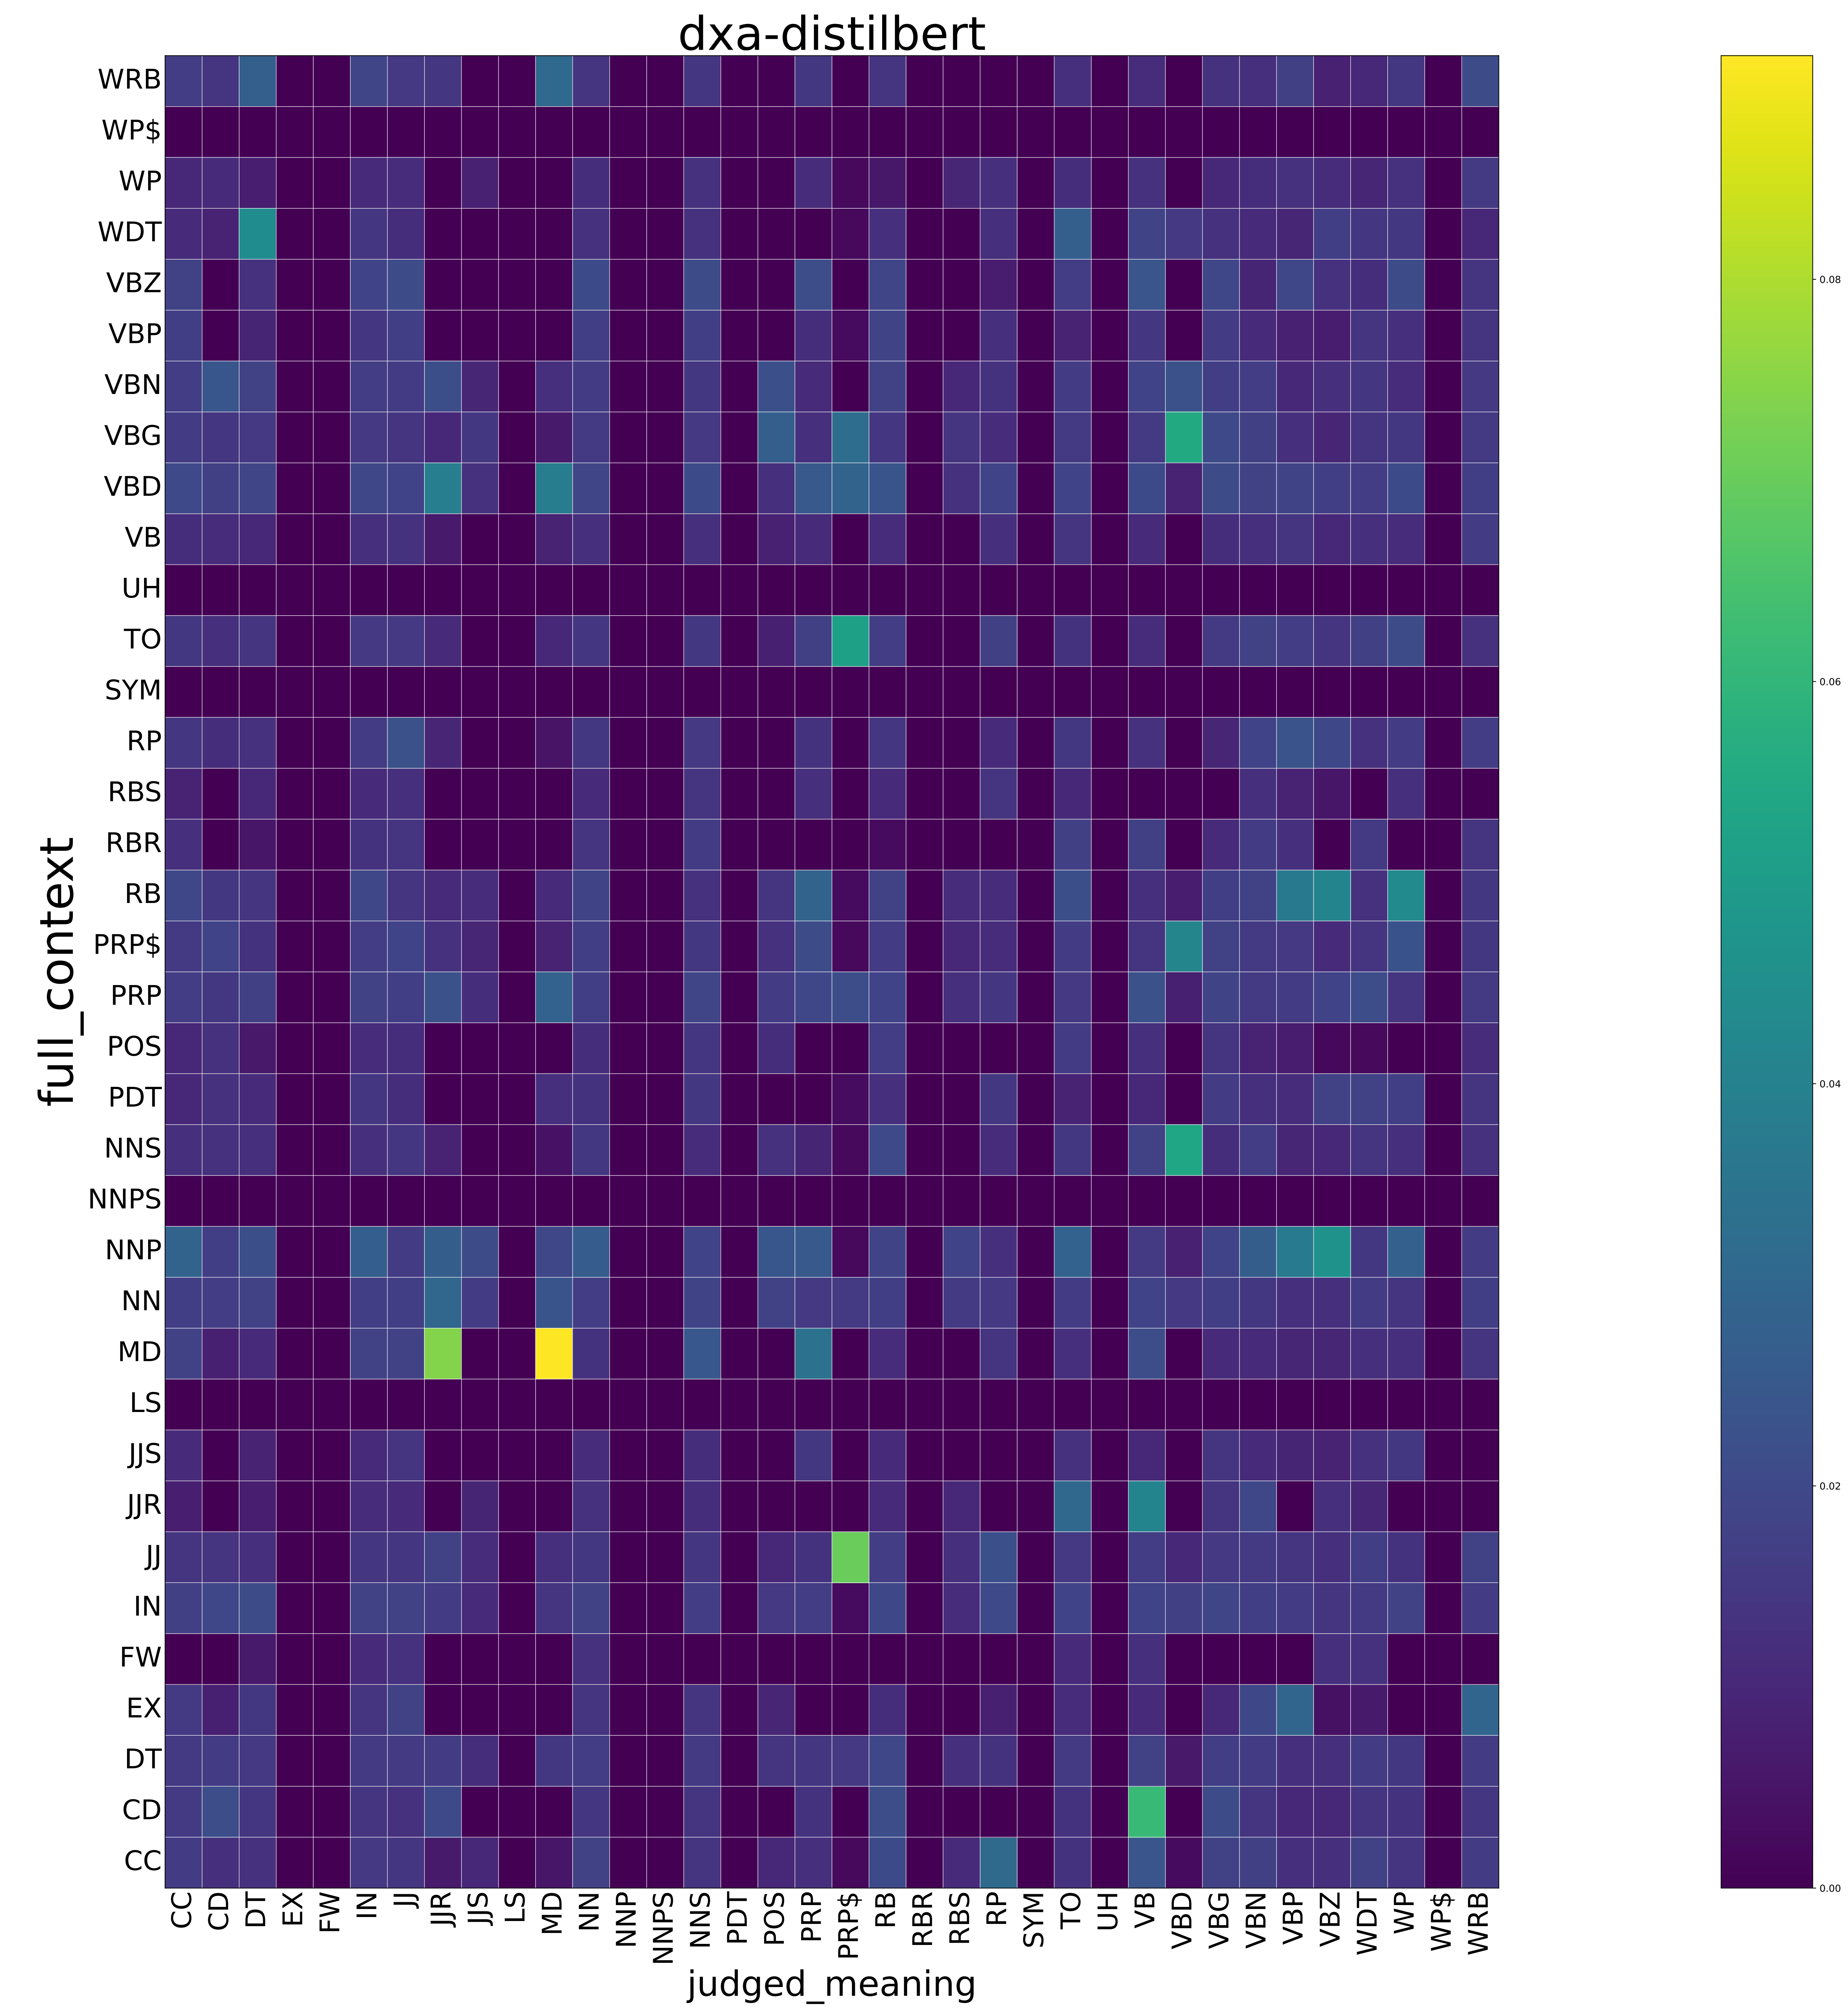

Supplement: SupplementaryMaterial [file dxa_mean_positive.pdf › figures/dxa_mean_positive.pdf]

# Counts of <full\_context, homonym> All Example Pairs

## Similarity Scores for SER

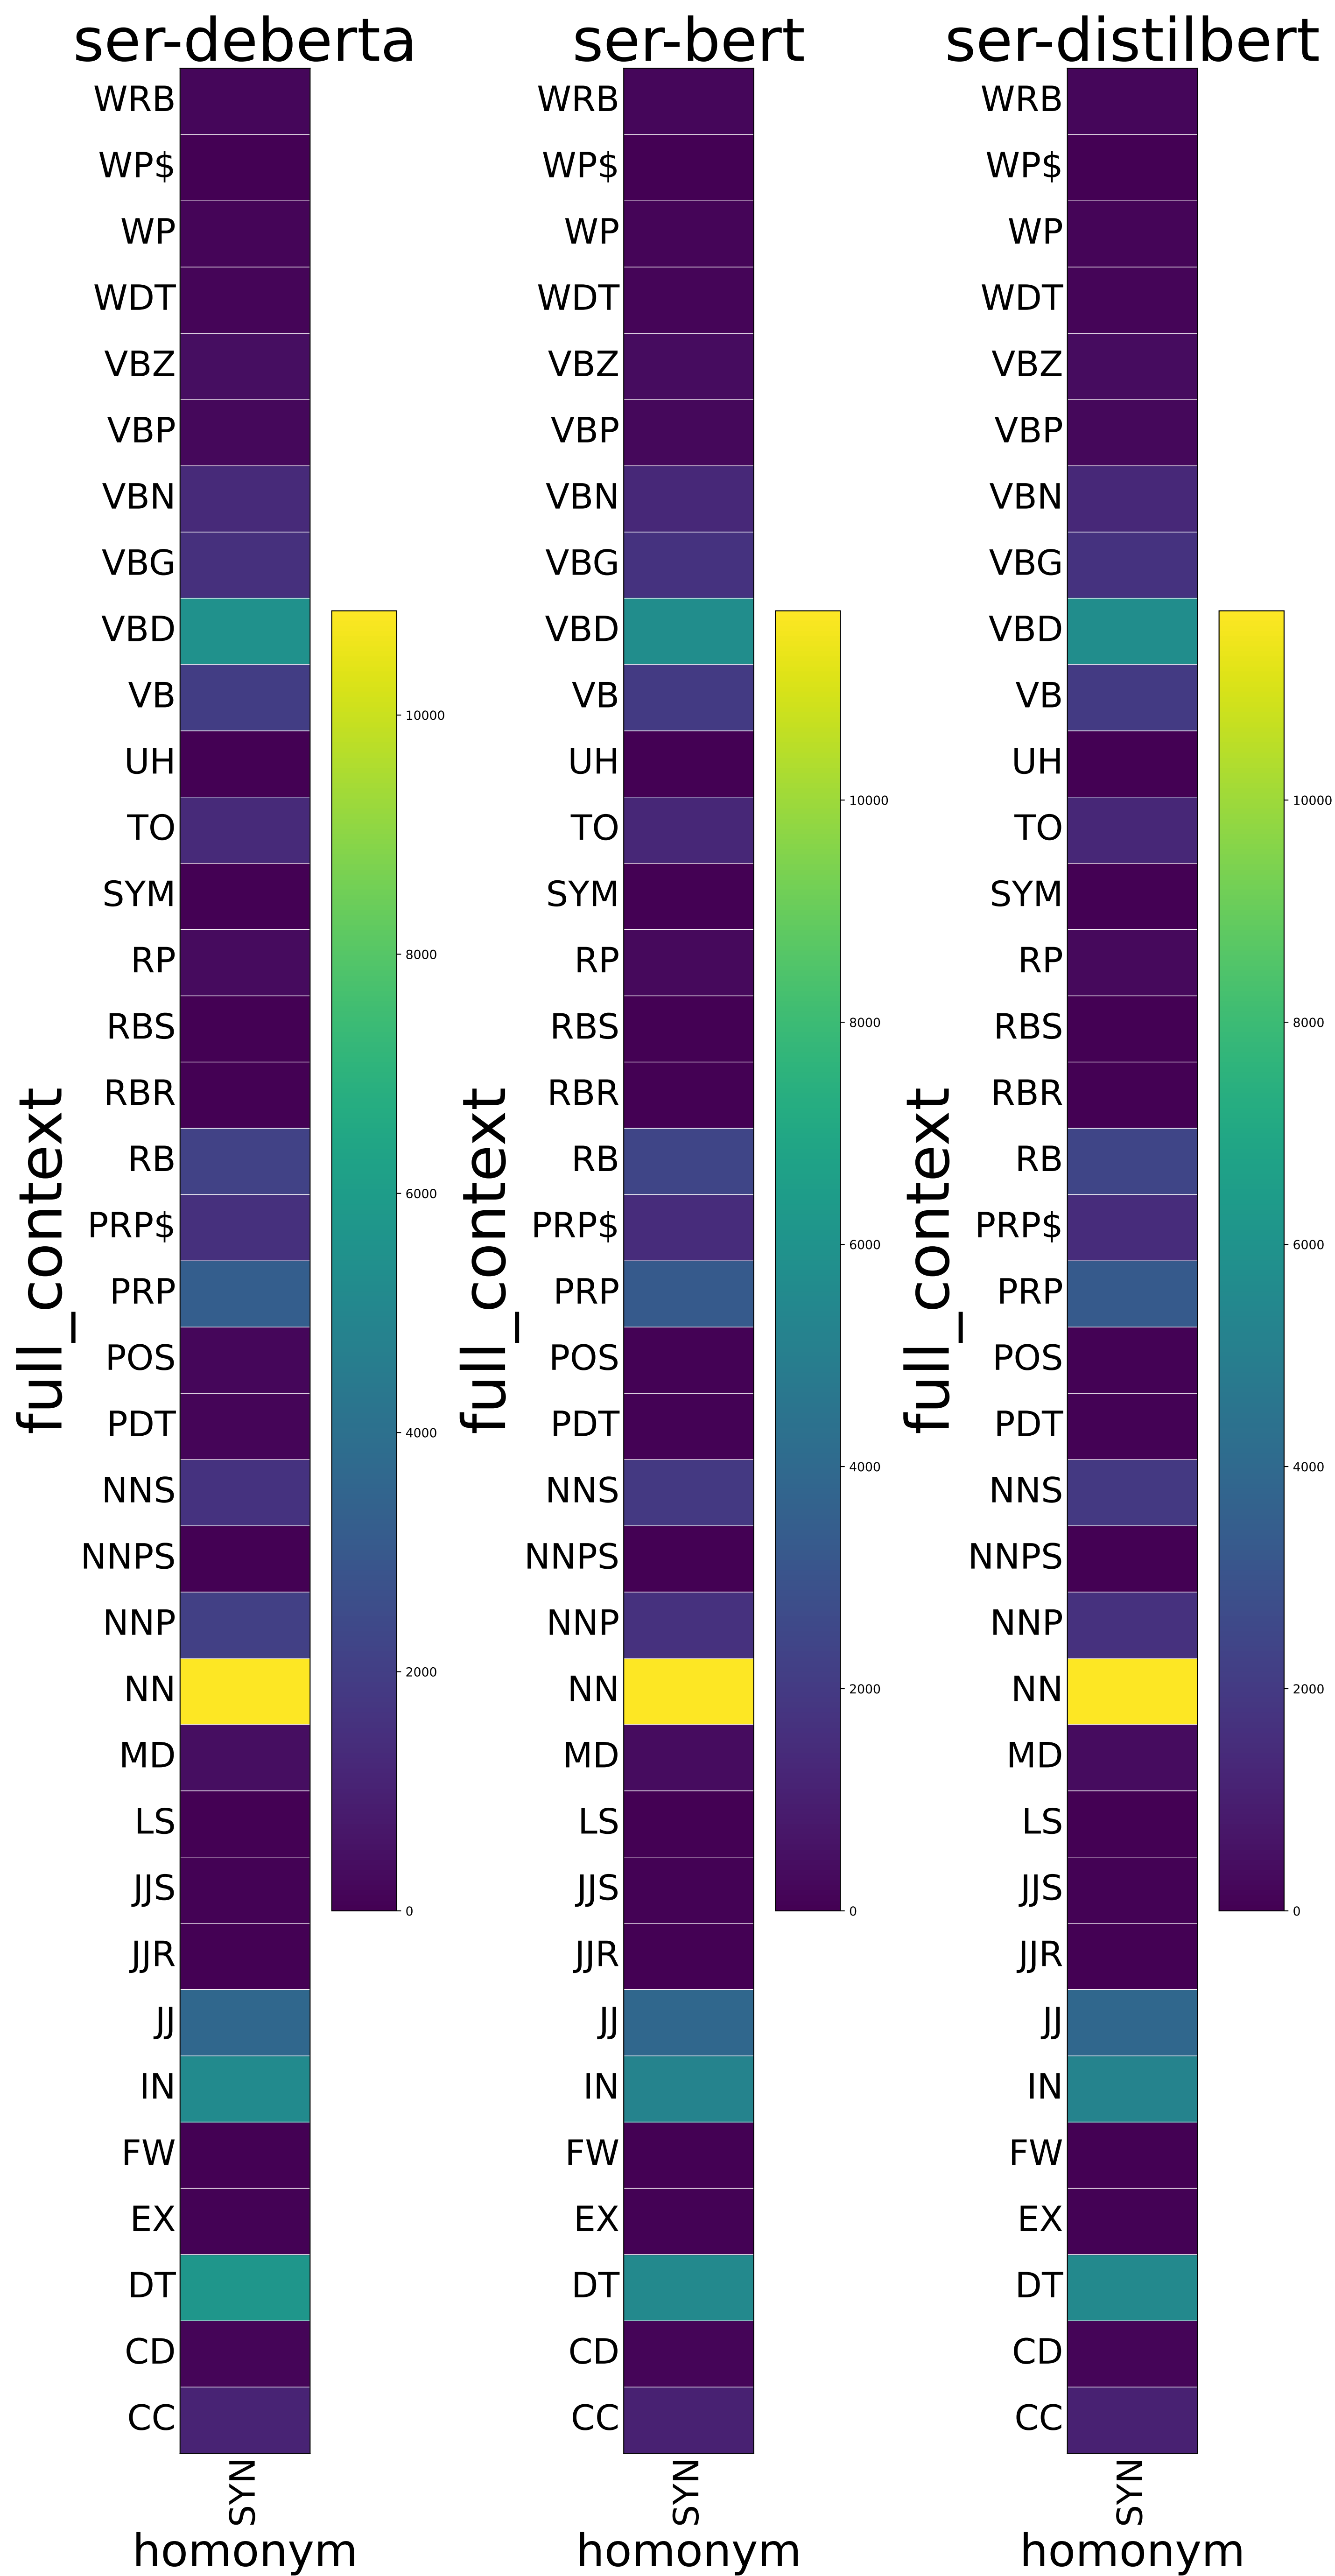

Supplement: SupplementaryMaterial [file ser_count_all.pdf › figures/ser_count_all.pdf]

# CV of <full\_context, homonym> All Example Pairs

## Similarity Scores for SER

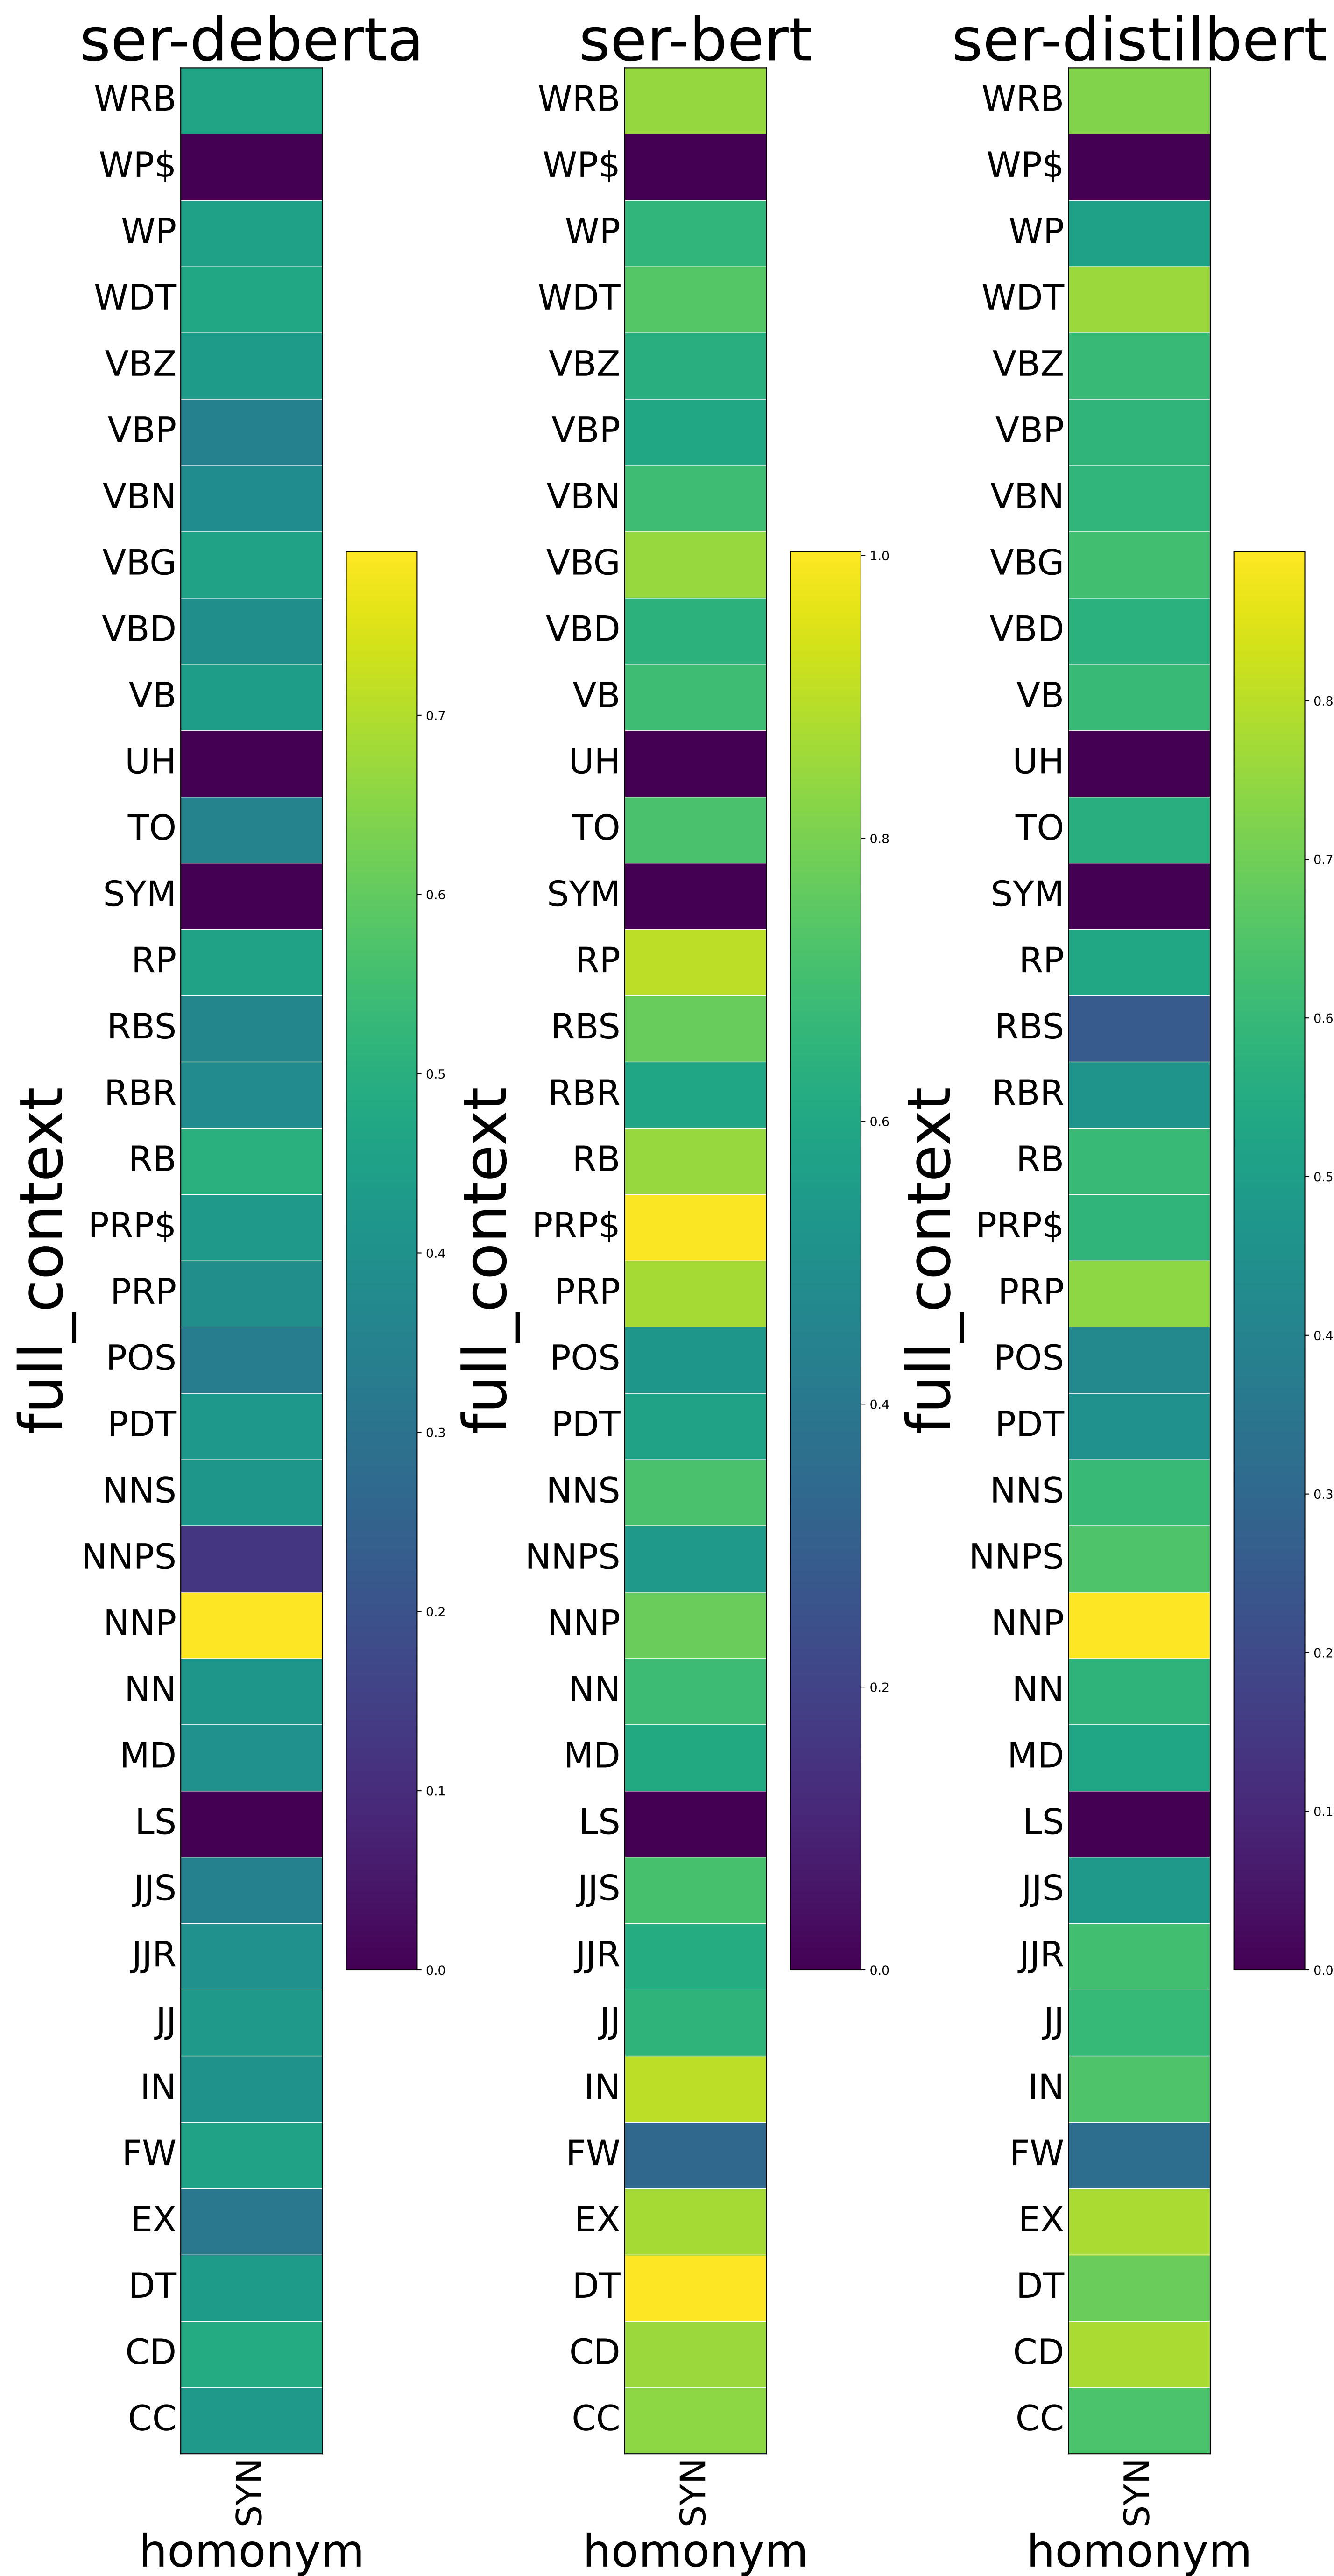

Supplement: SupplementaryMaterial [file ser_cv_all.pdf › figures/ser_cv_all.pdf]

# CV of <full\_context, homonym> Negative Example Pairs

## Similarity Scores for SER

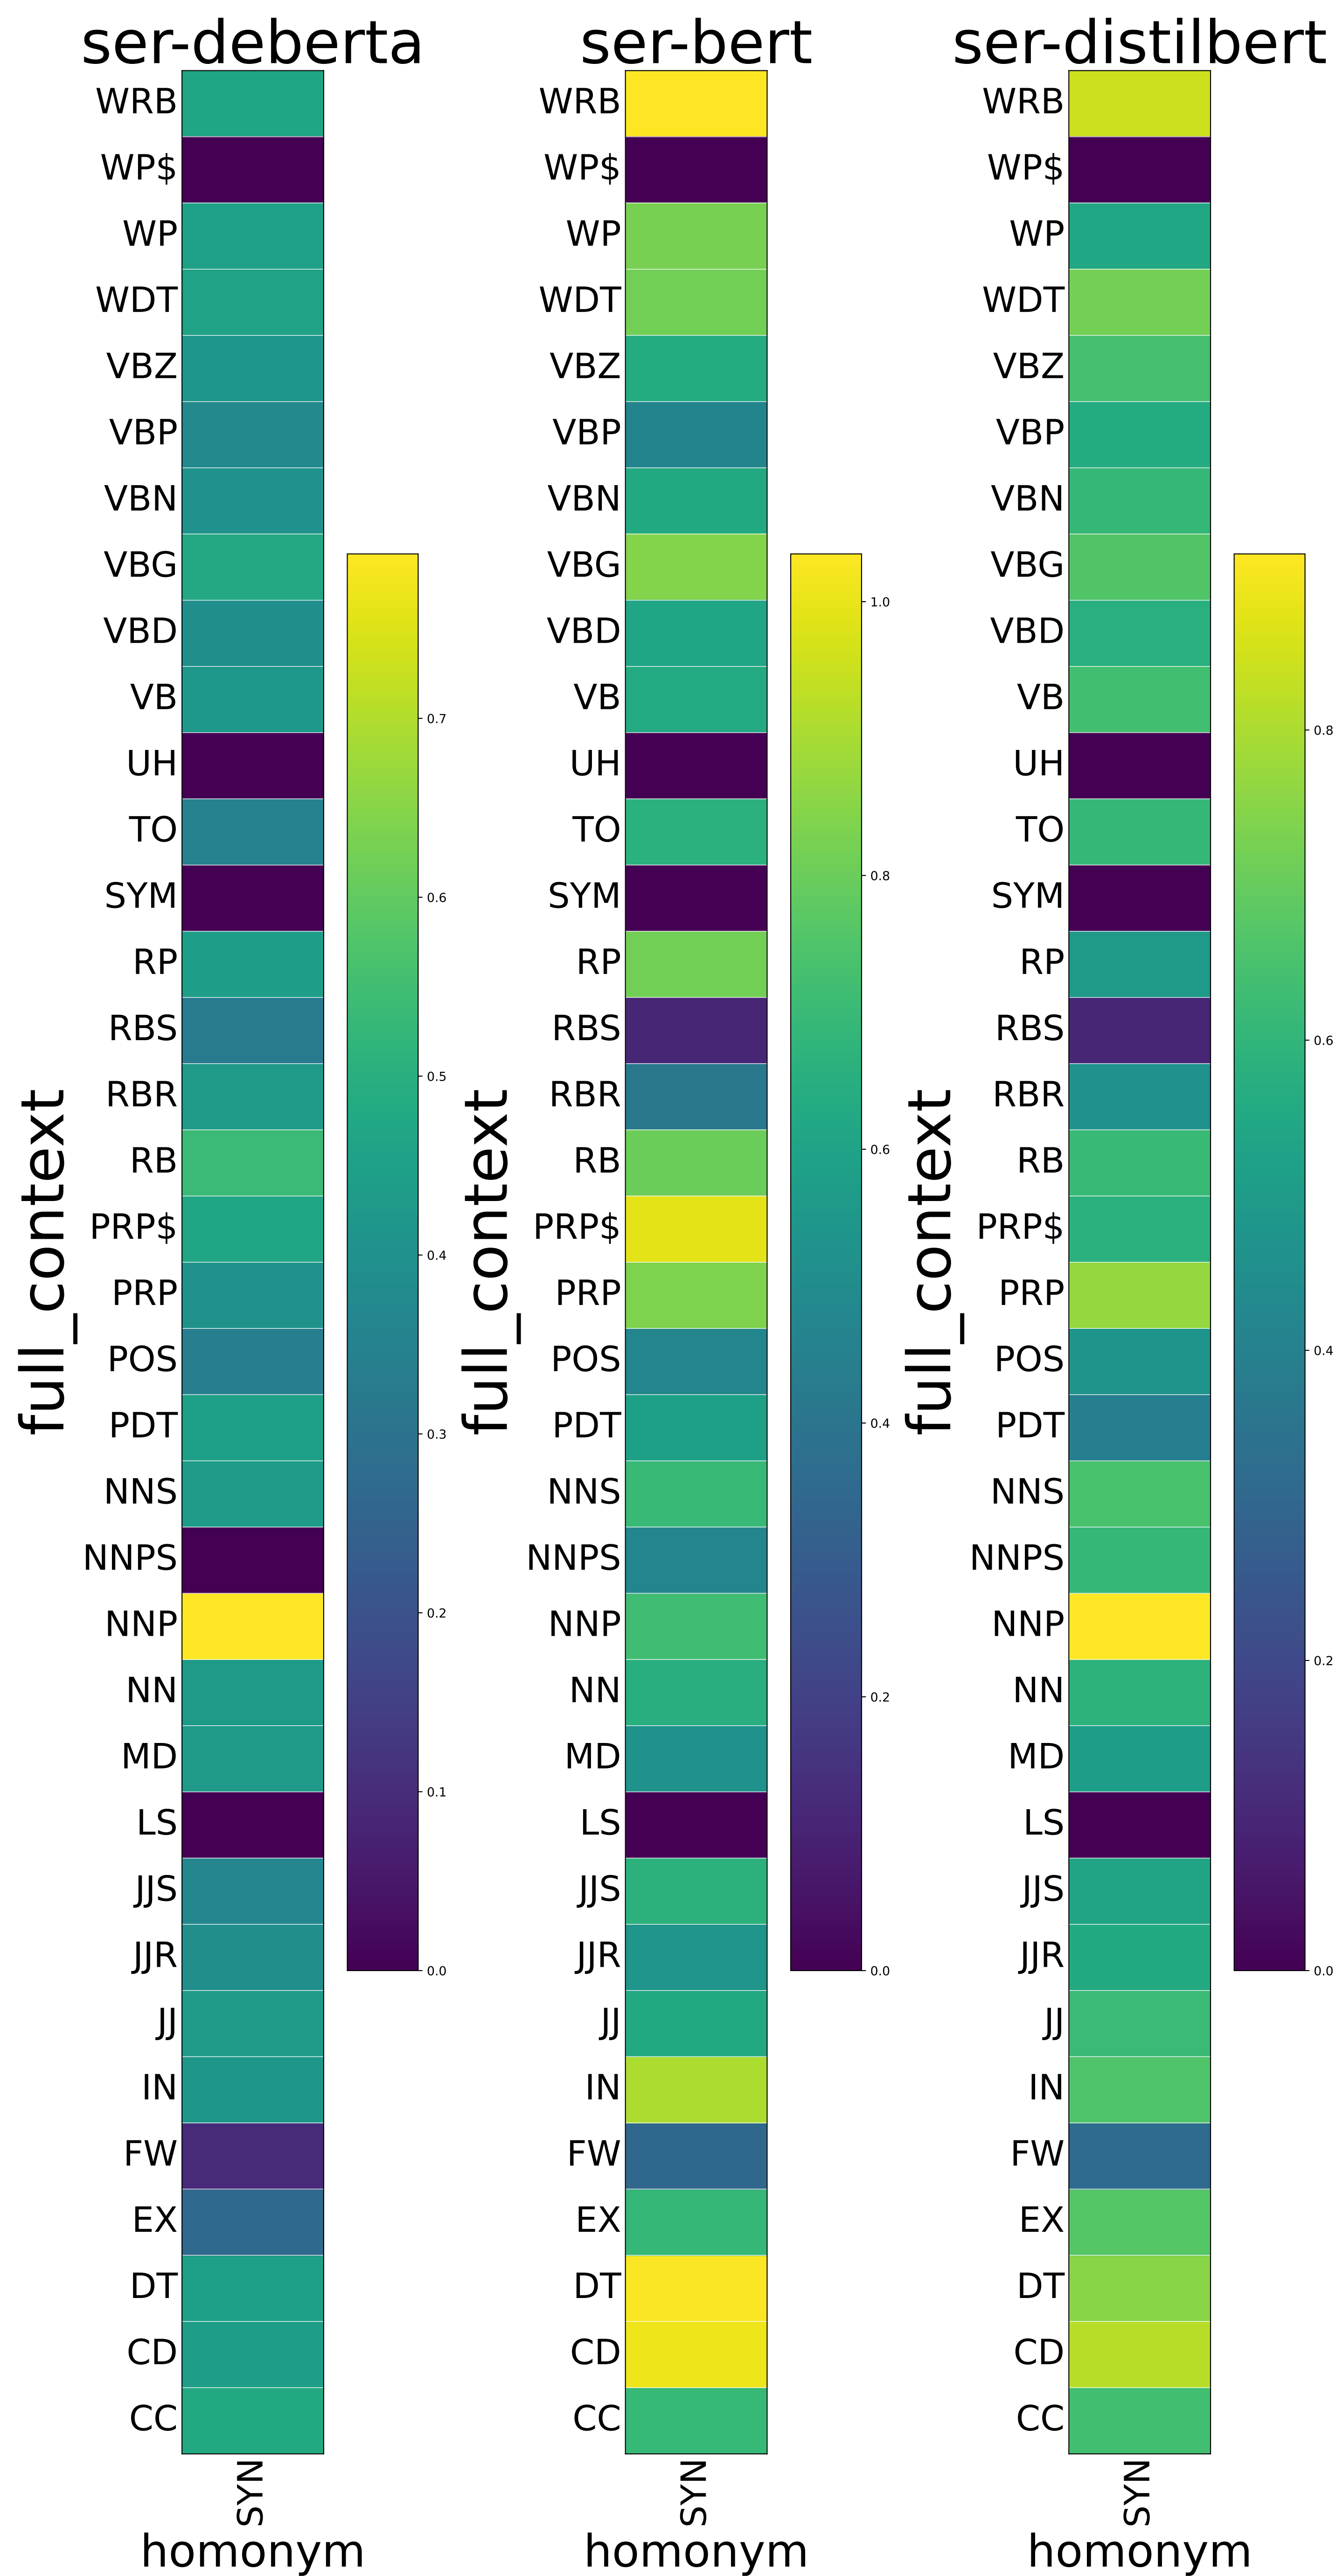

Supplement: SupplementaryMaterial [file ser_cv_negative.pdf › figures/ser_cv_negative.pdf]

# CV of <full\_context, homonym> Neutral Example Pairs

## Similarity Scores for SER

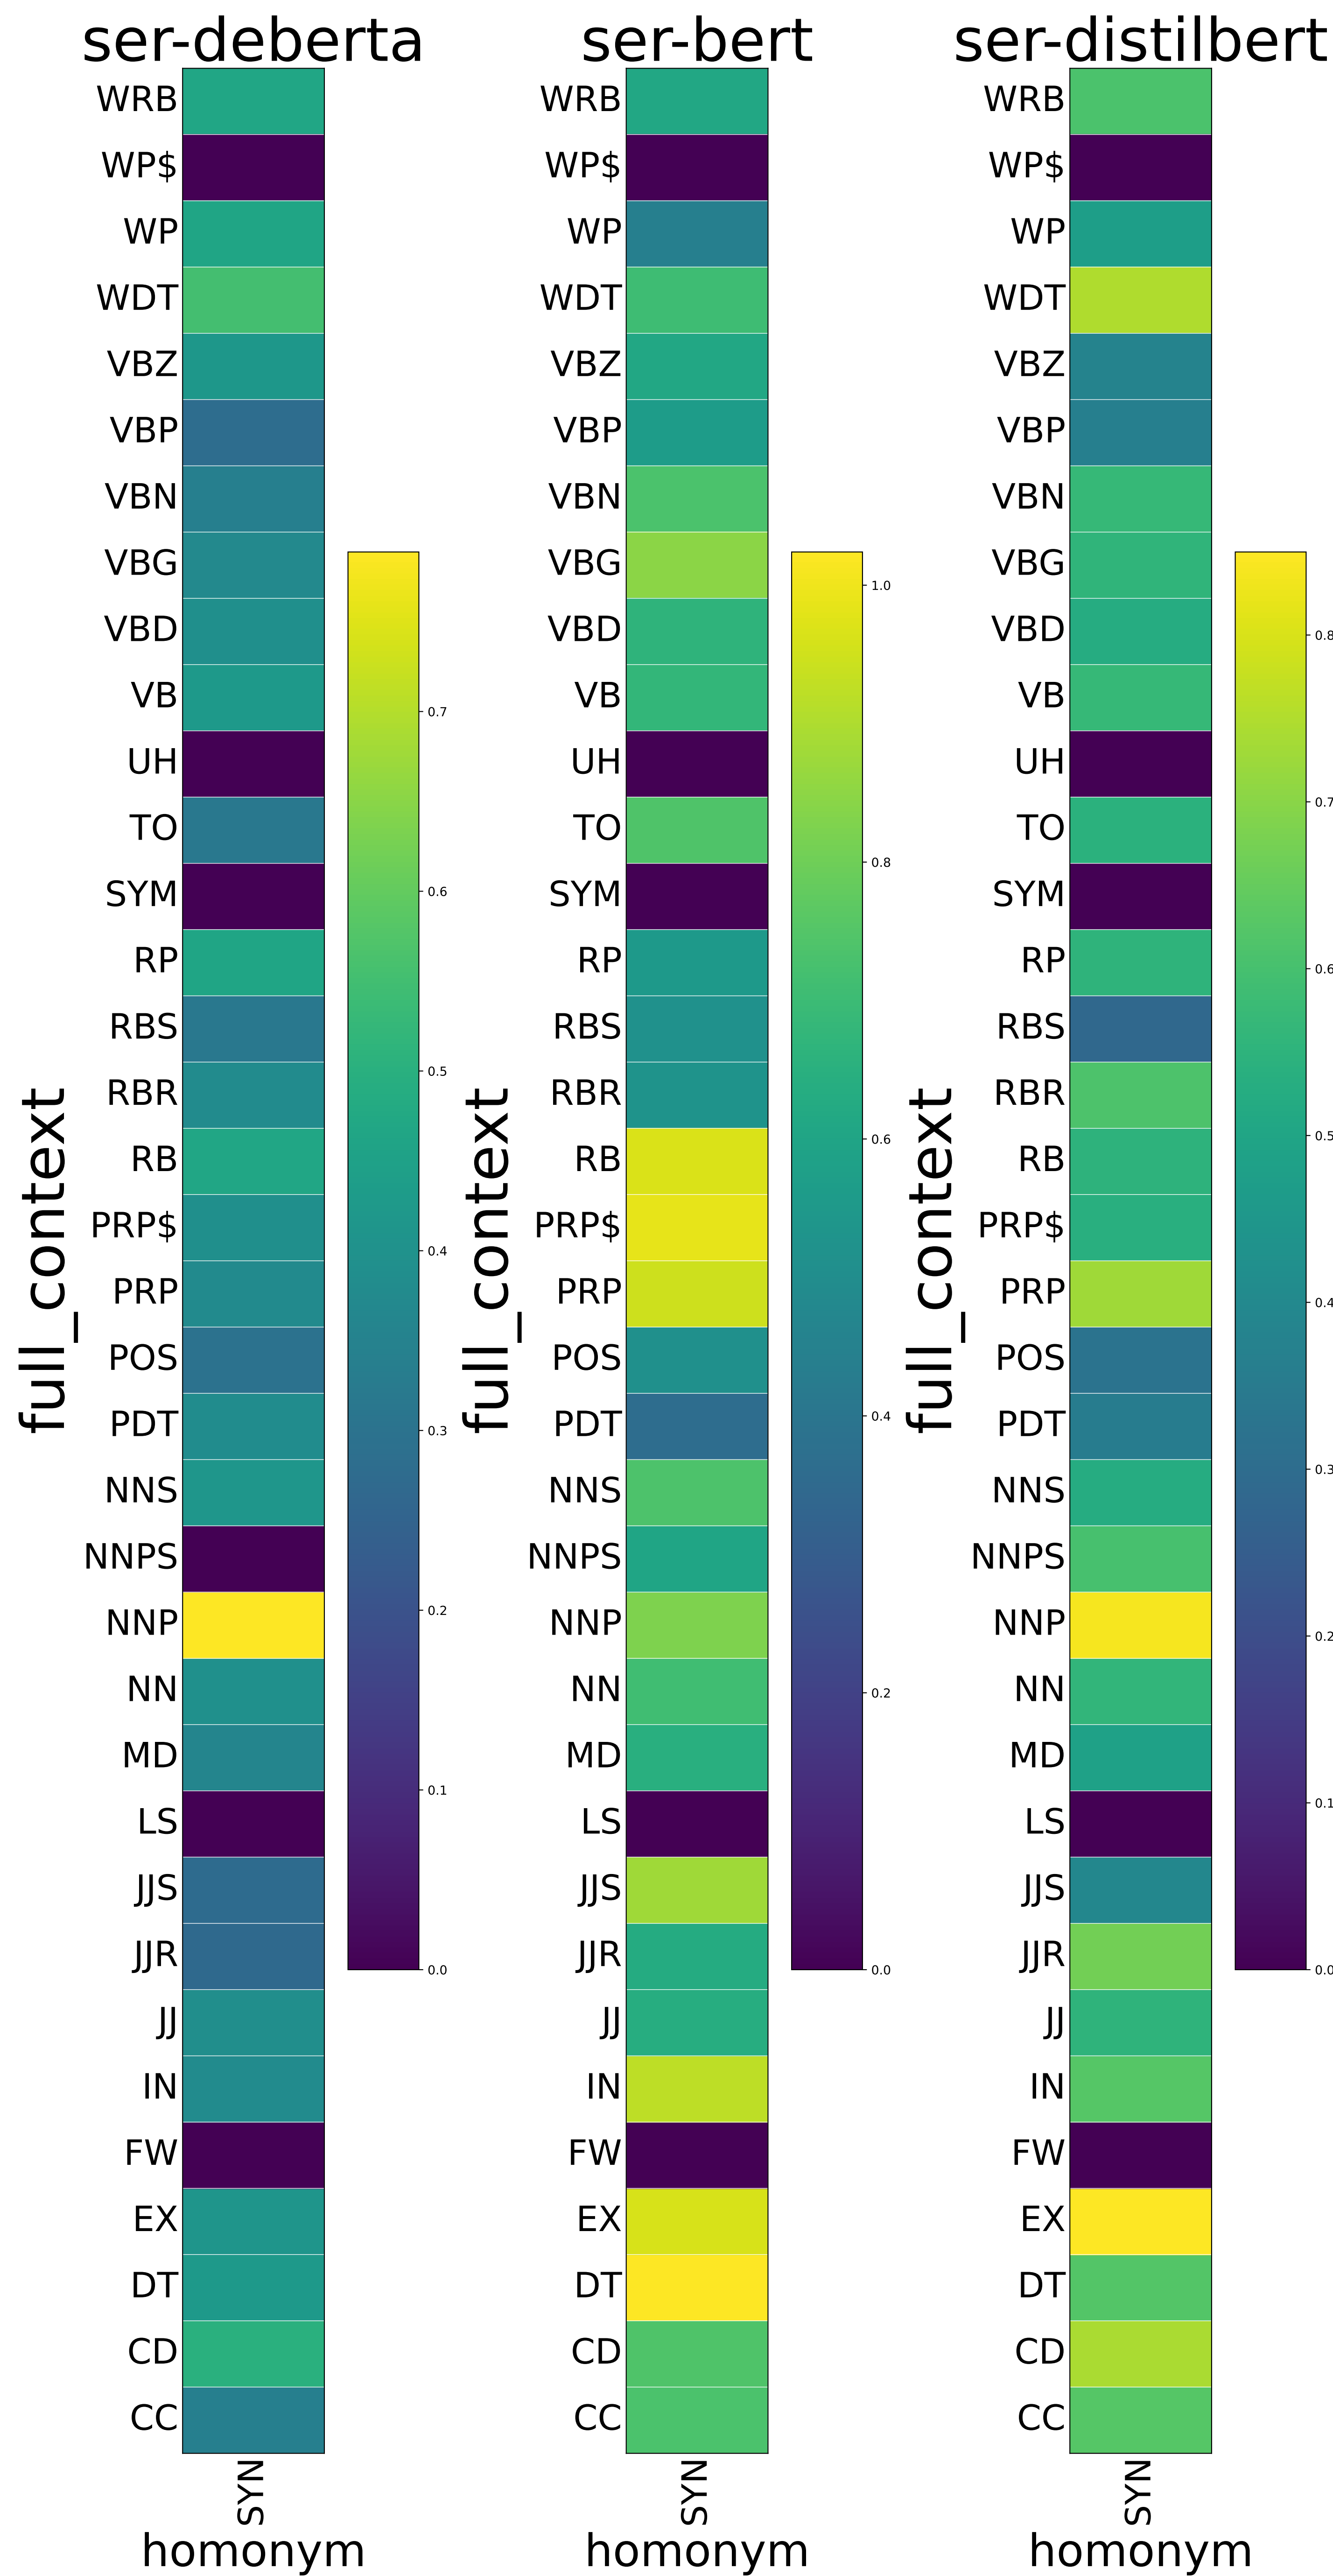

Supplement: SupplementaryMaterial [file ser_cv_neutral.pdf › figures/ser_cv_neutral.pdf]

# Mean of <full\_context, homonym> All Example Pairs Similarity Scores for SER

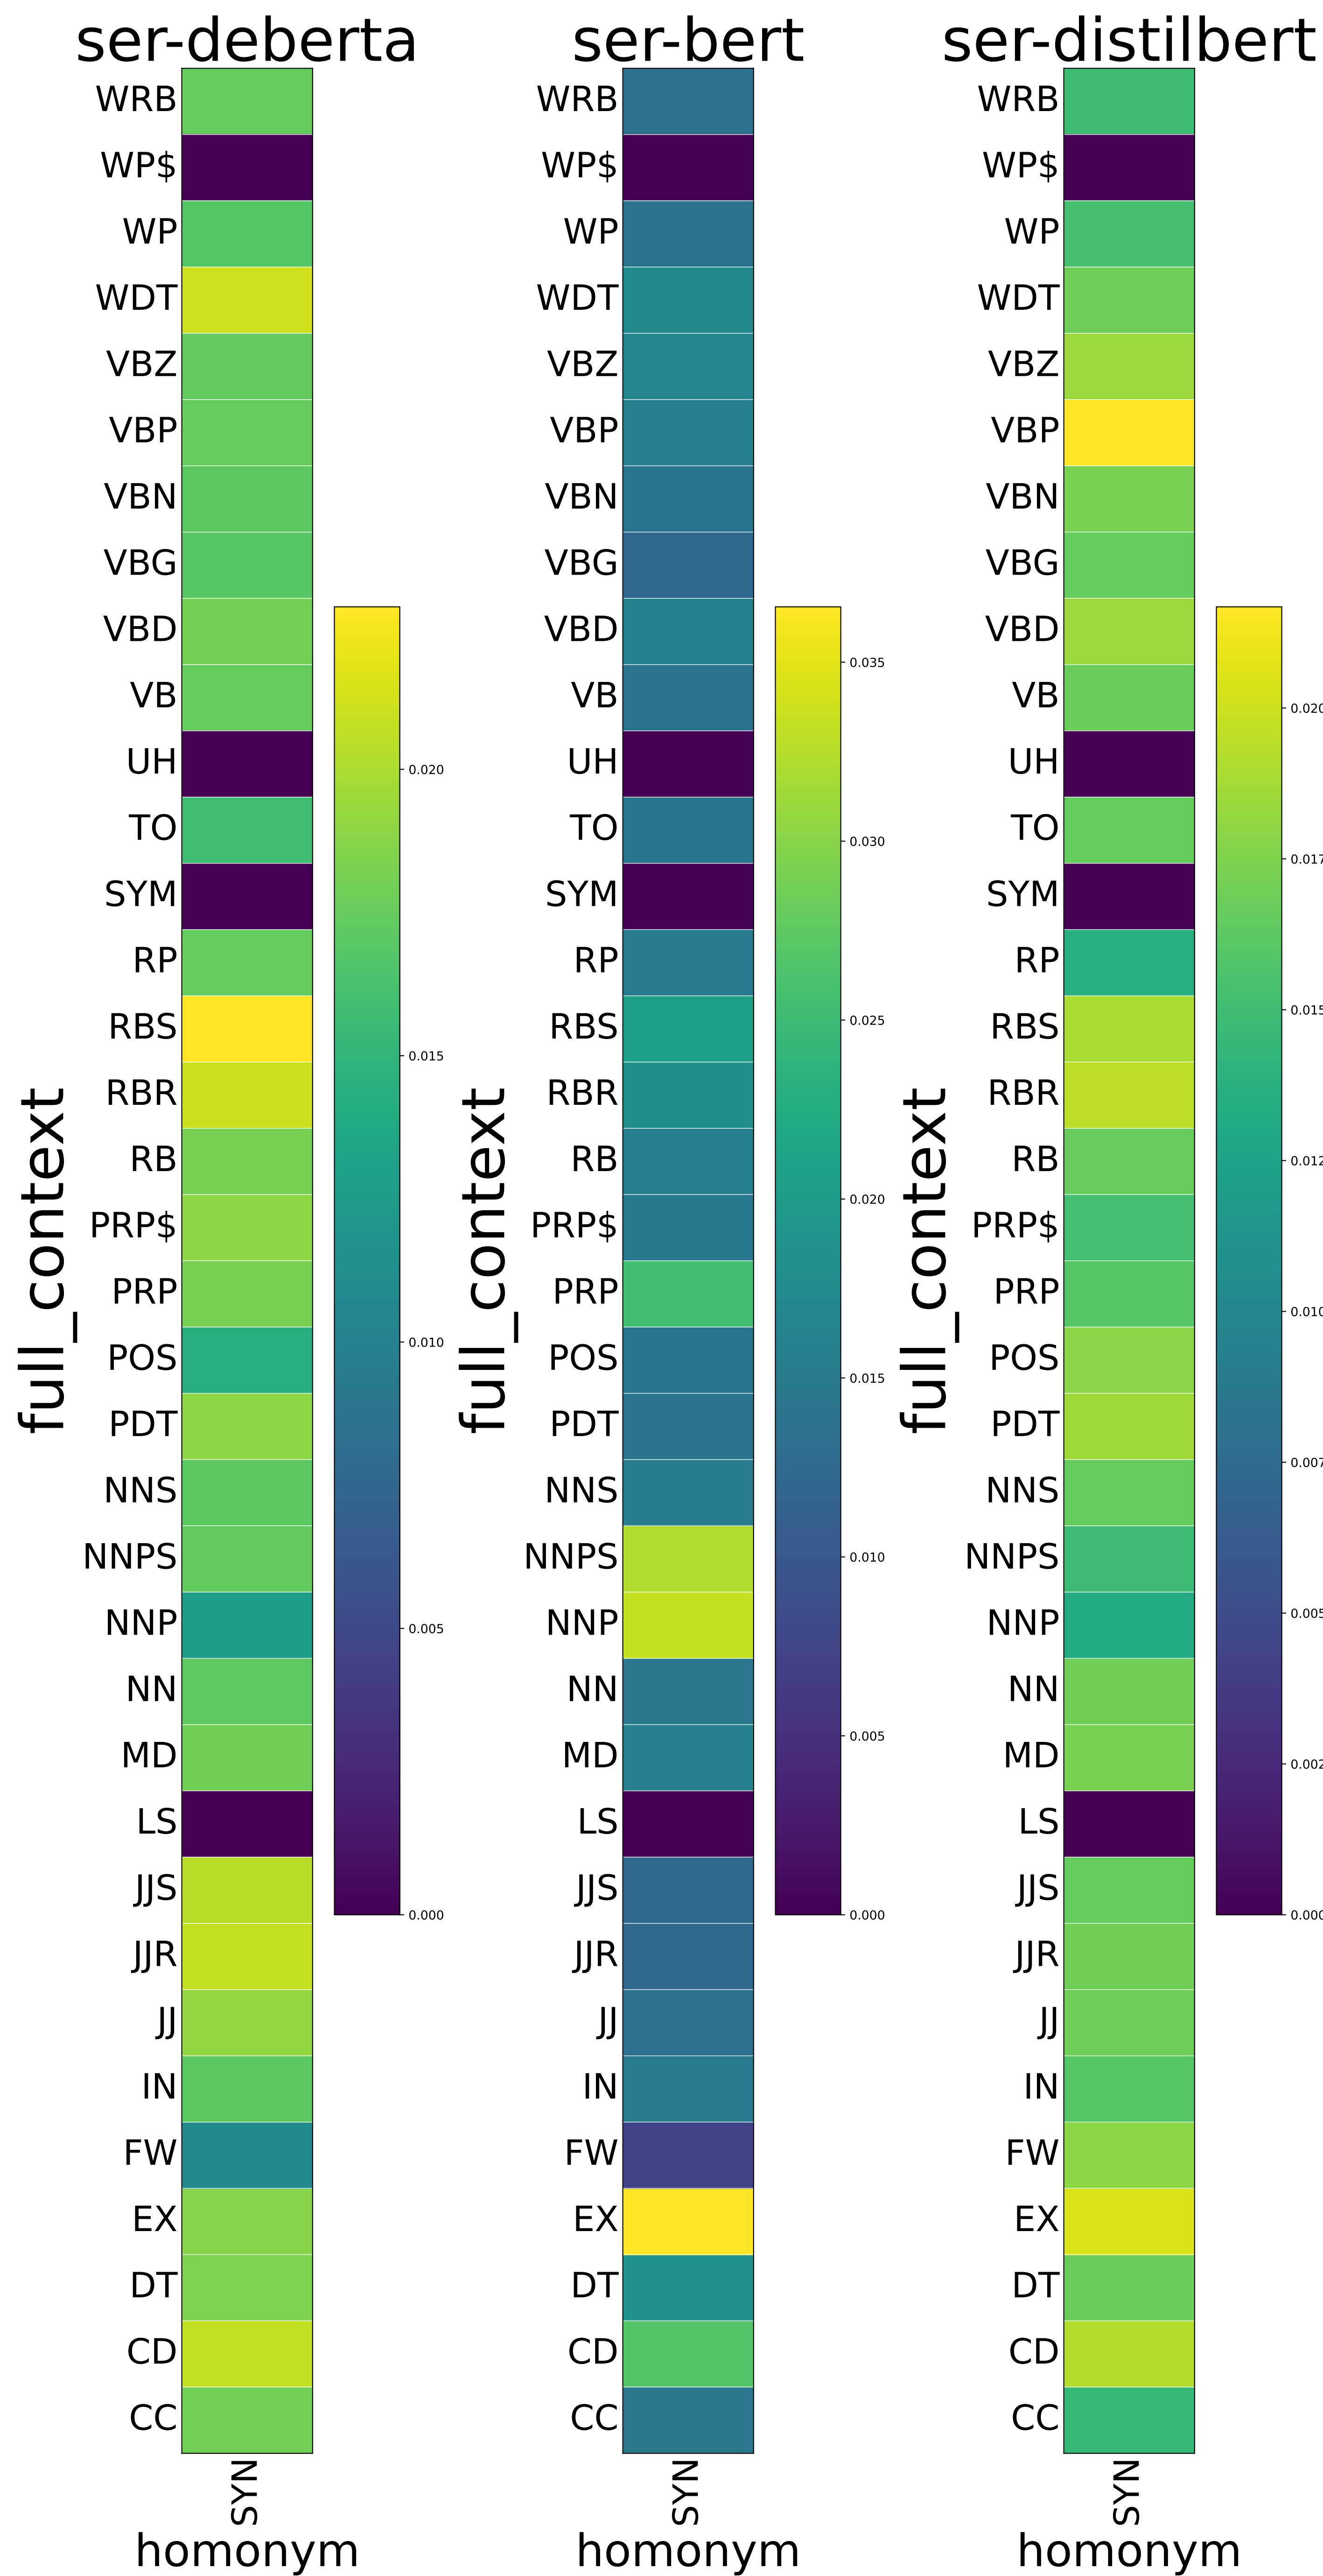

Supplement: SupplementaryMaterial [file ser_mean_all.pdf › figures/ser_mean_all.pdf]

# Mean of <full\_context, homonym> Neutral Example Pairs

## Similarity Scores for SER

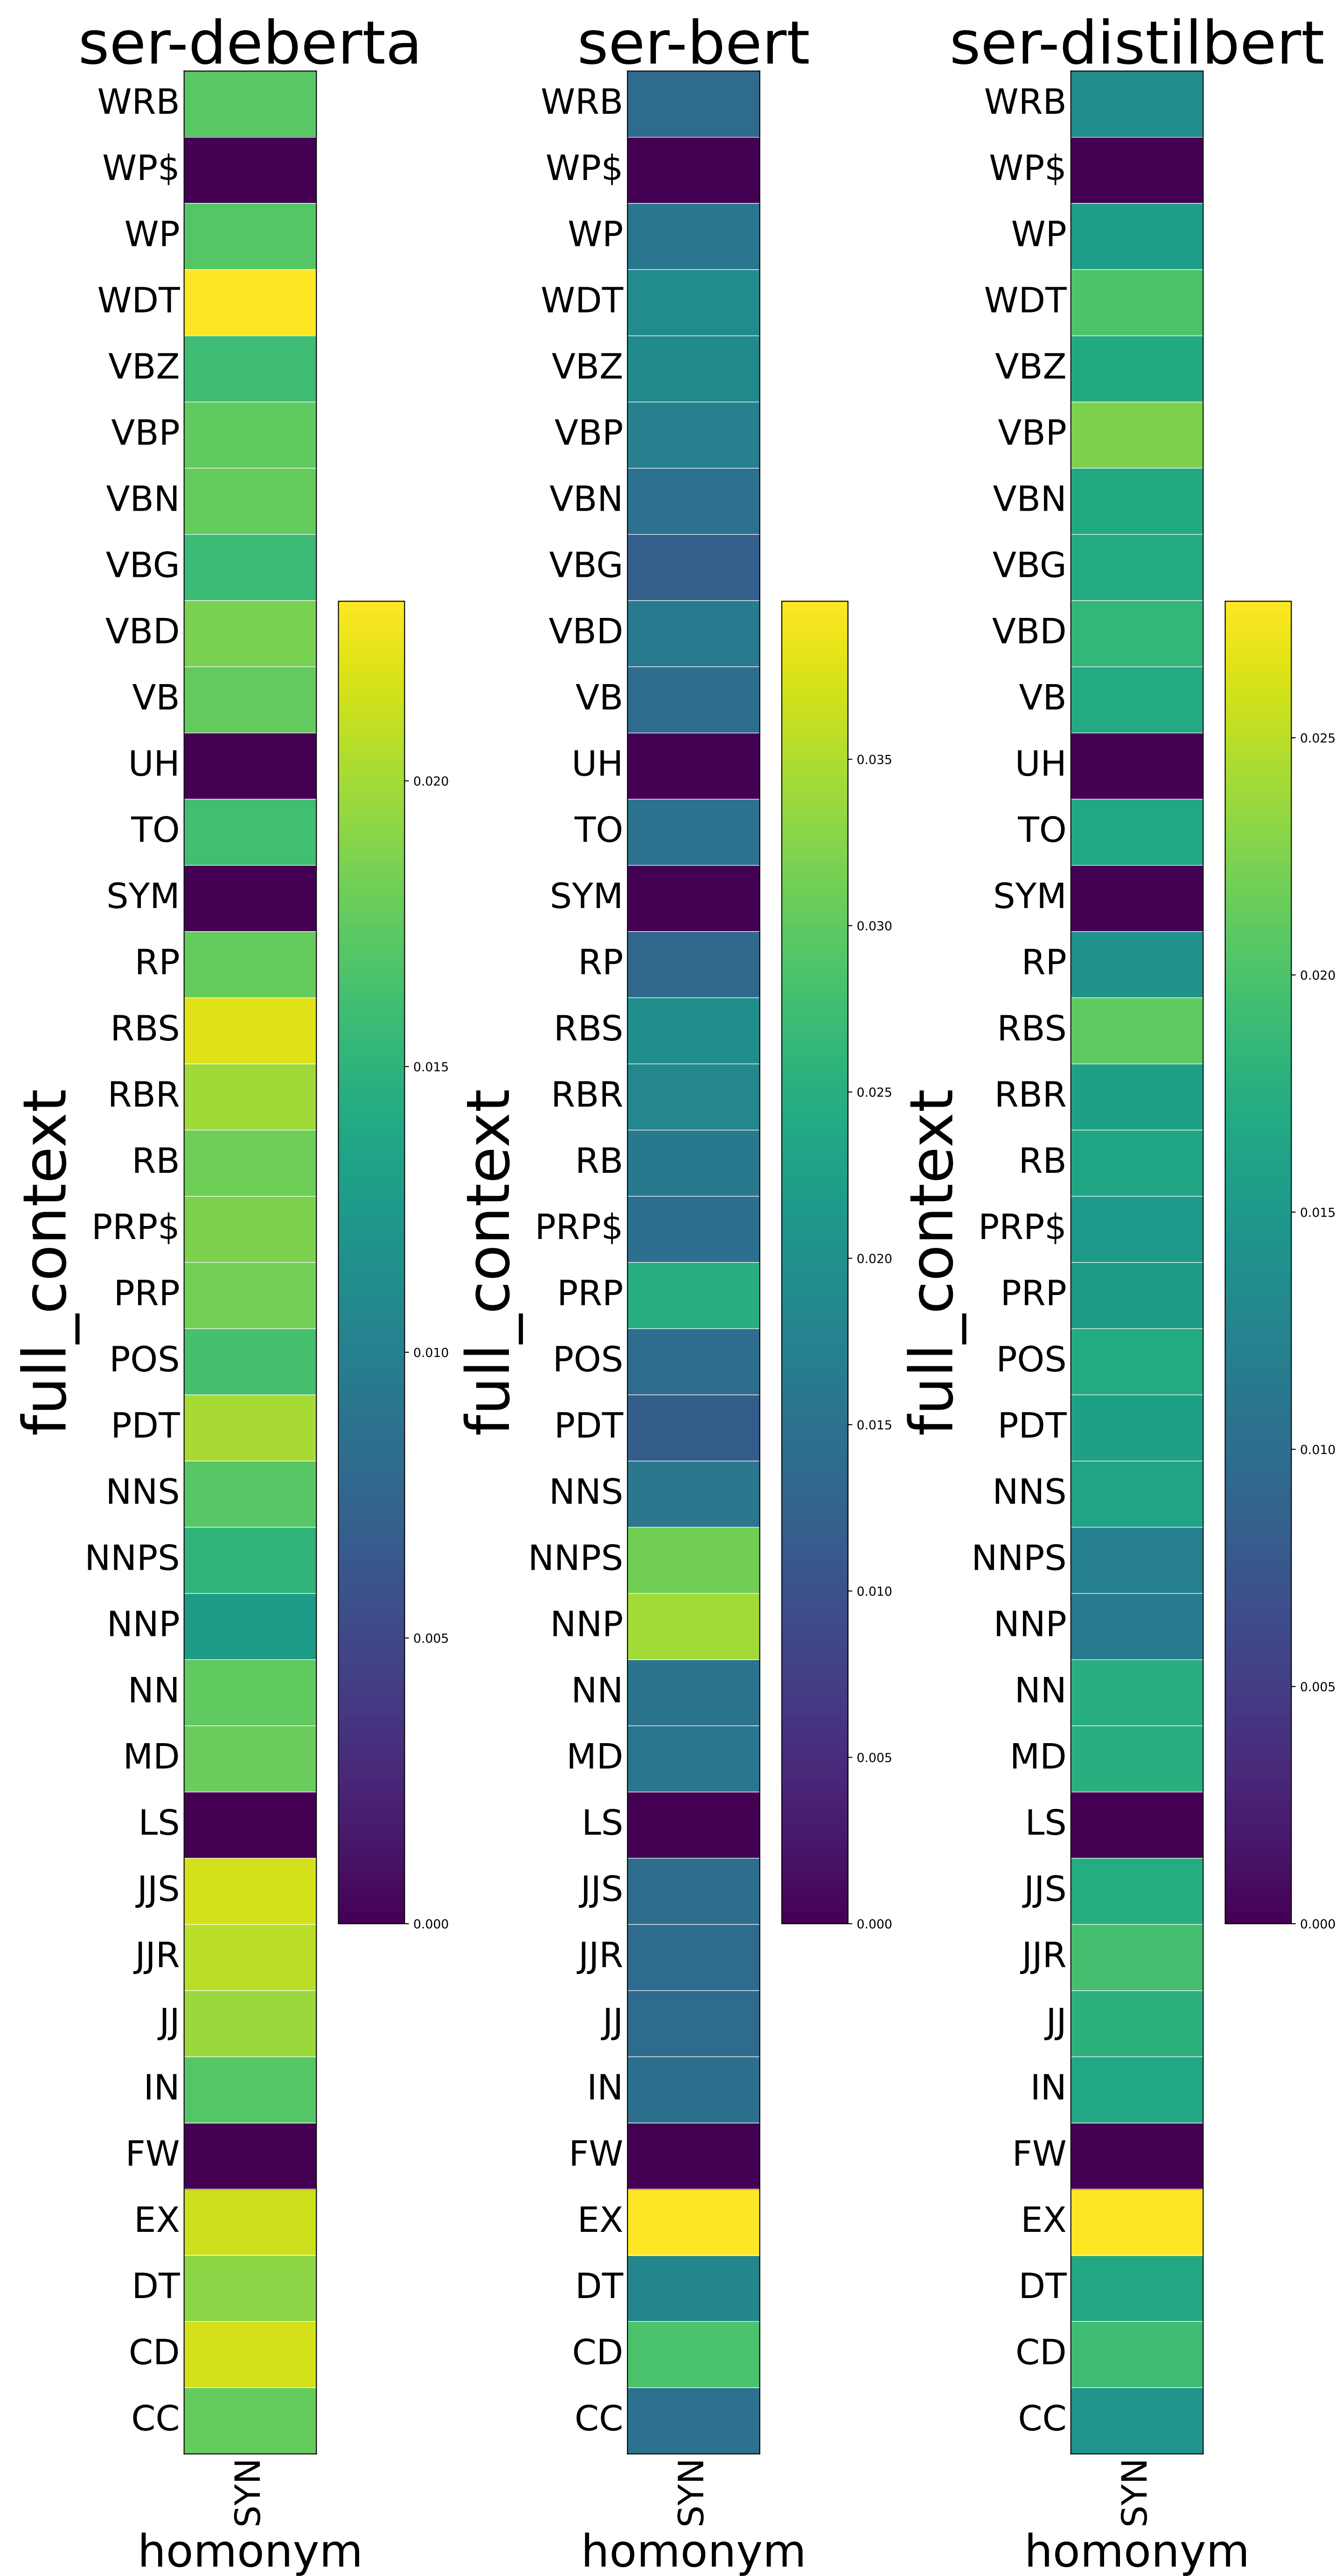

Supplement: SupplementaryMaterial [file ser_mean_neutral.pdf › figures/ser_mean_neutral.pdf]

# Mean of <full\_context, homonym> Positive Example Pairs Similarity Scores for SER

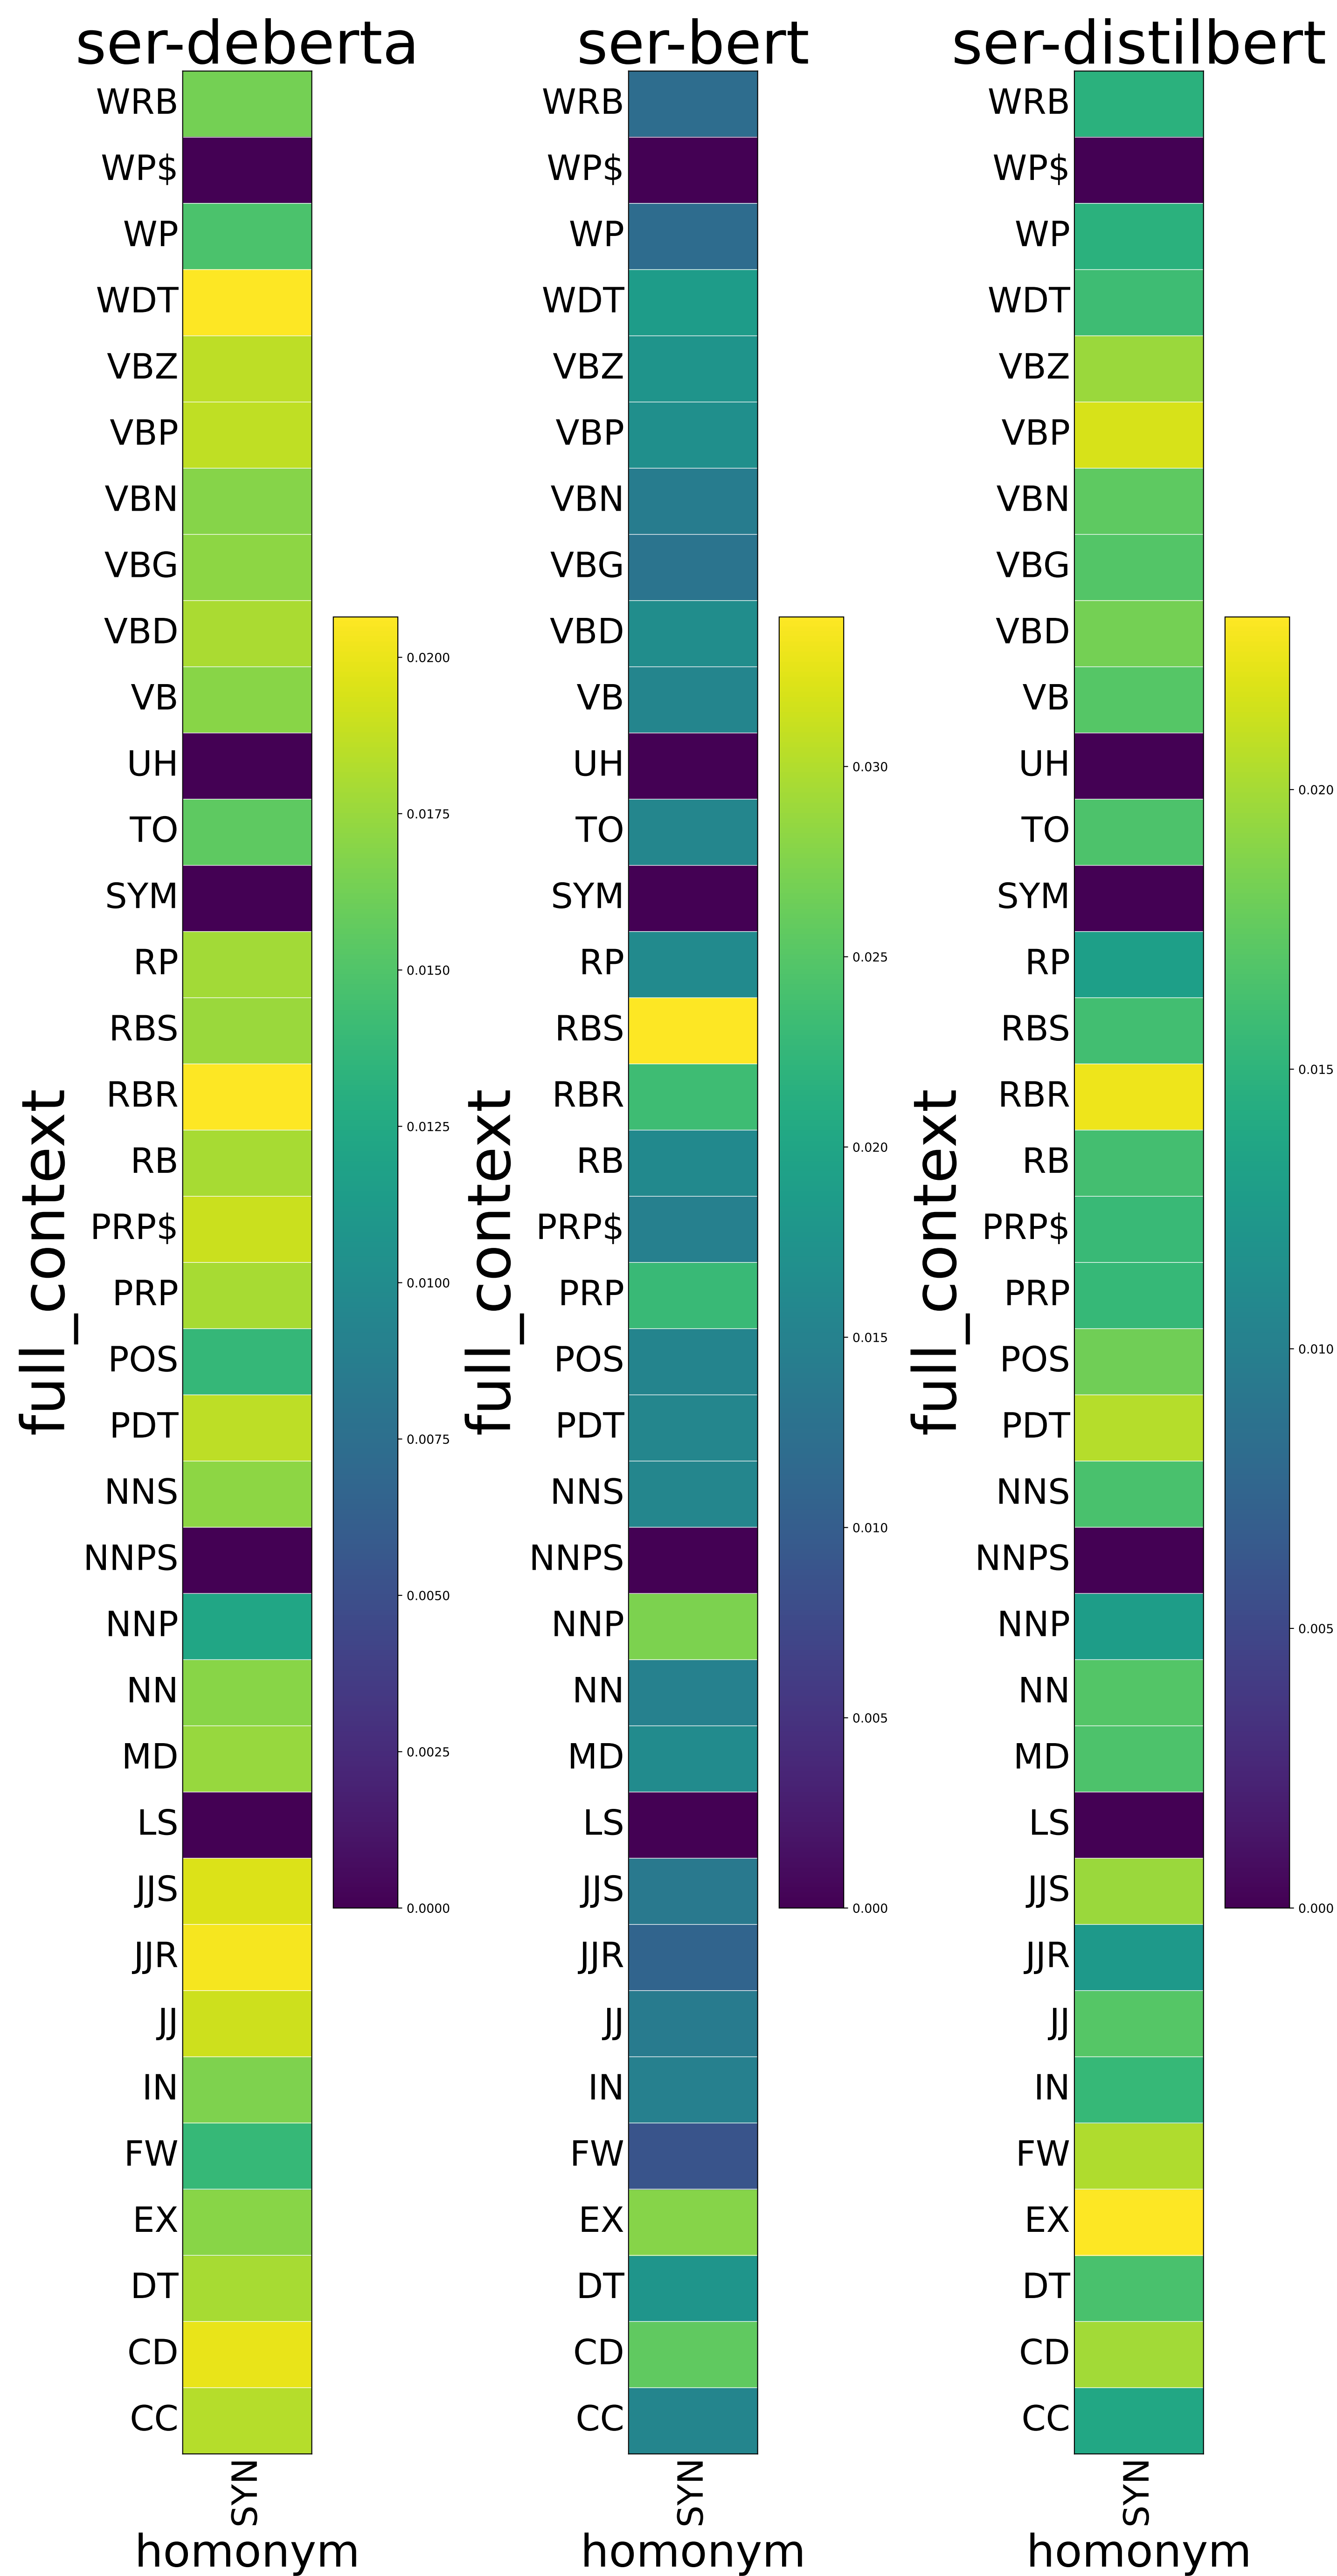

Supplement: SupplementaryMaterial [file ser_mean_positive.pdf › figures/ser_mean_positive.pdf]

# Standard Deviation of <full\_context, homonym> All Example Pairs

## Similarity Scores for SER

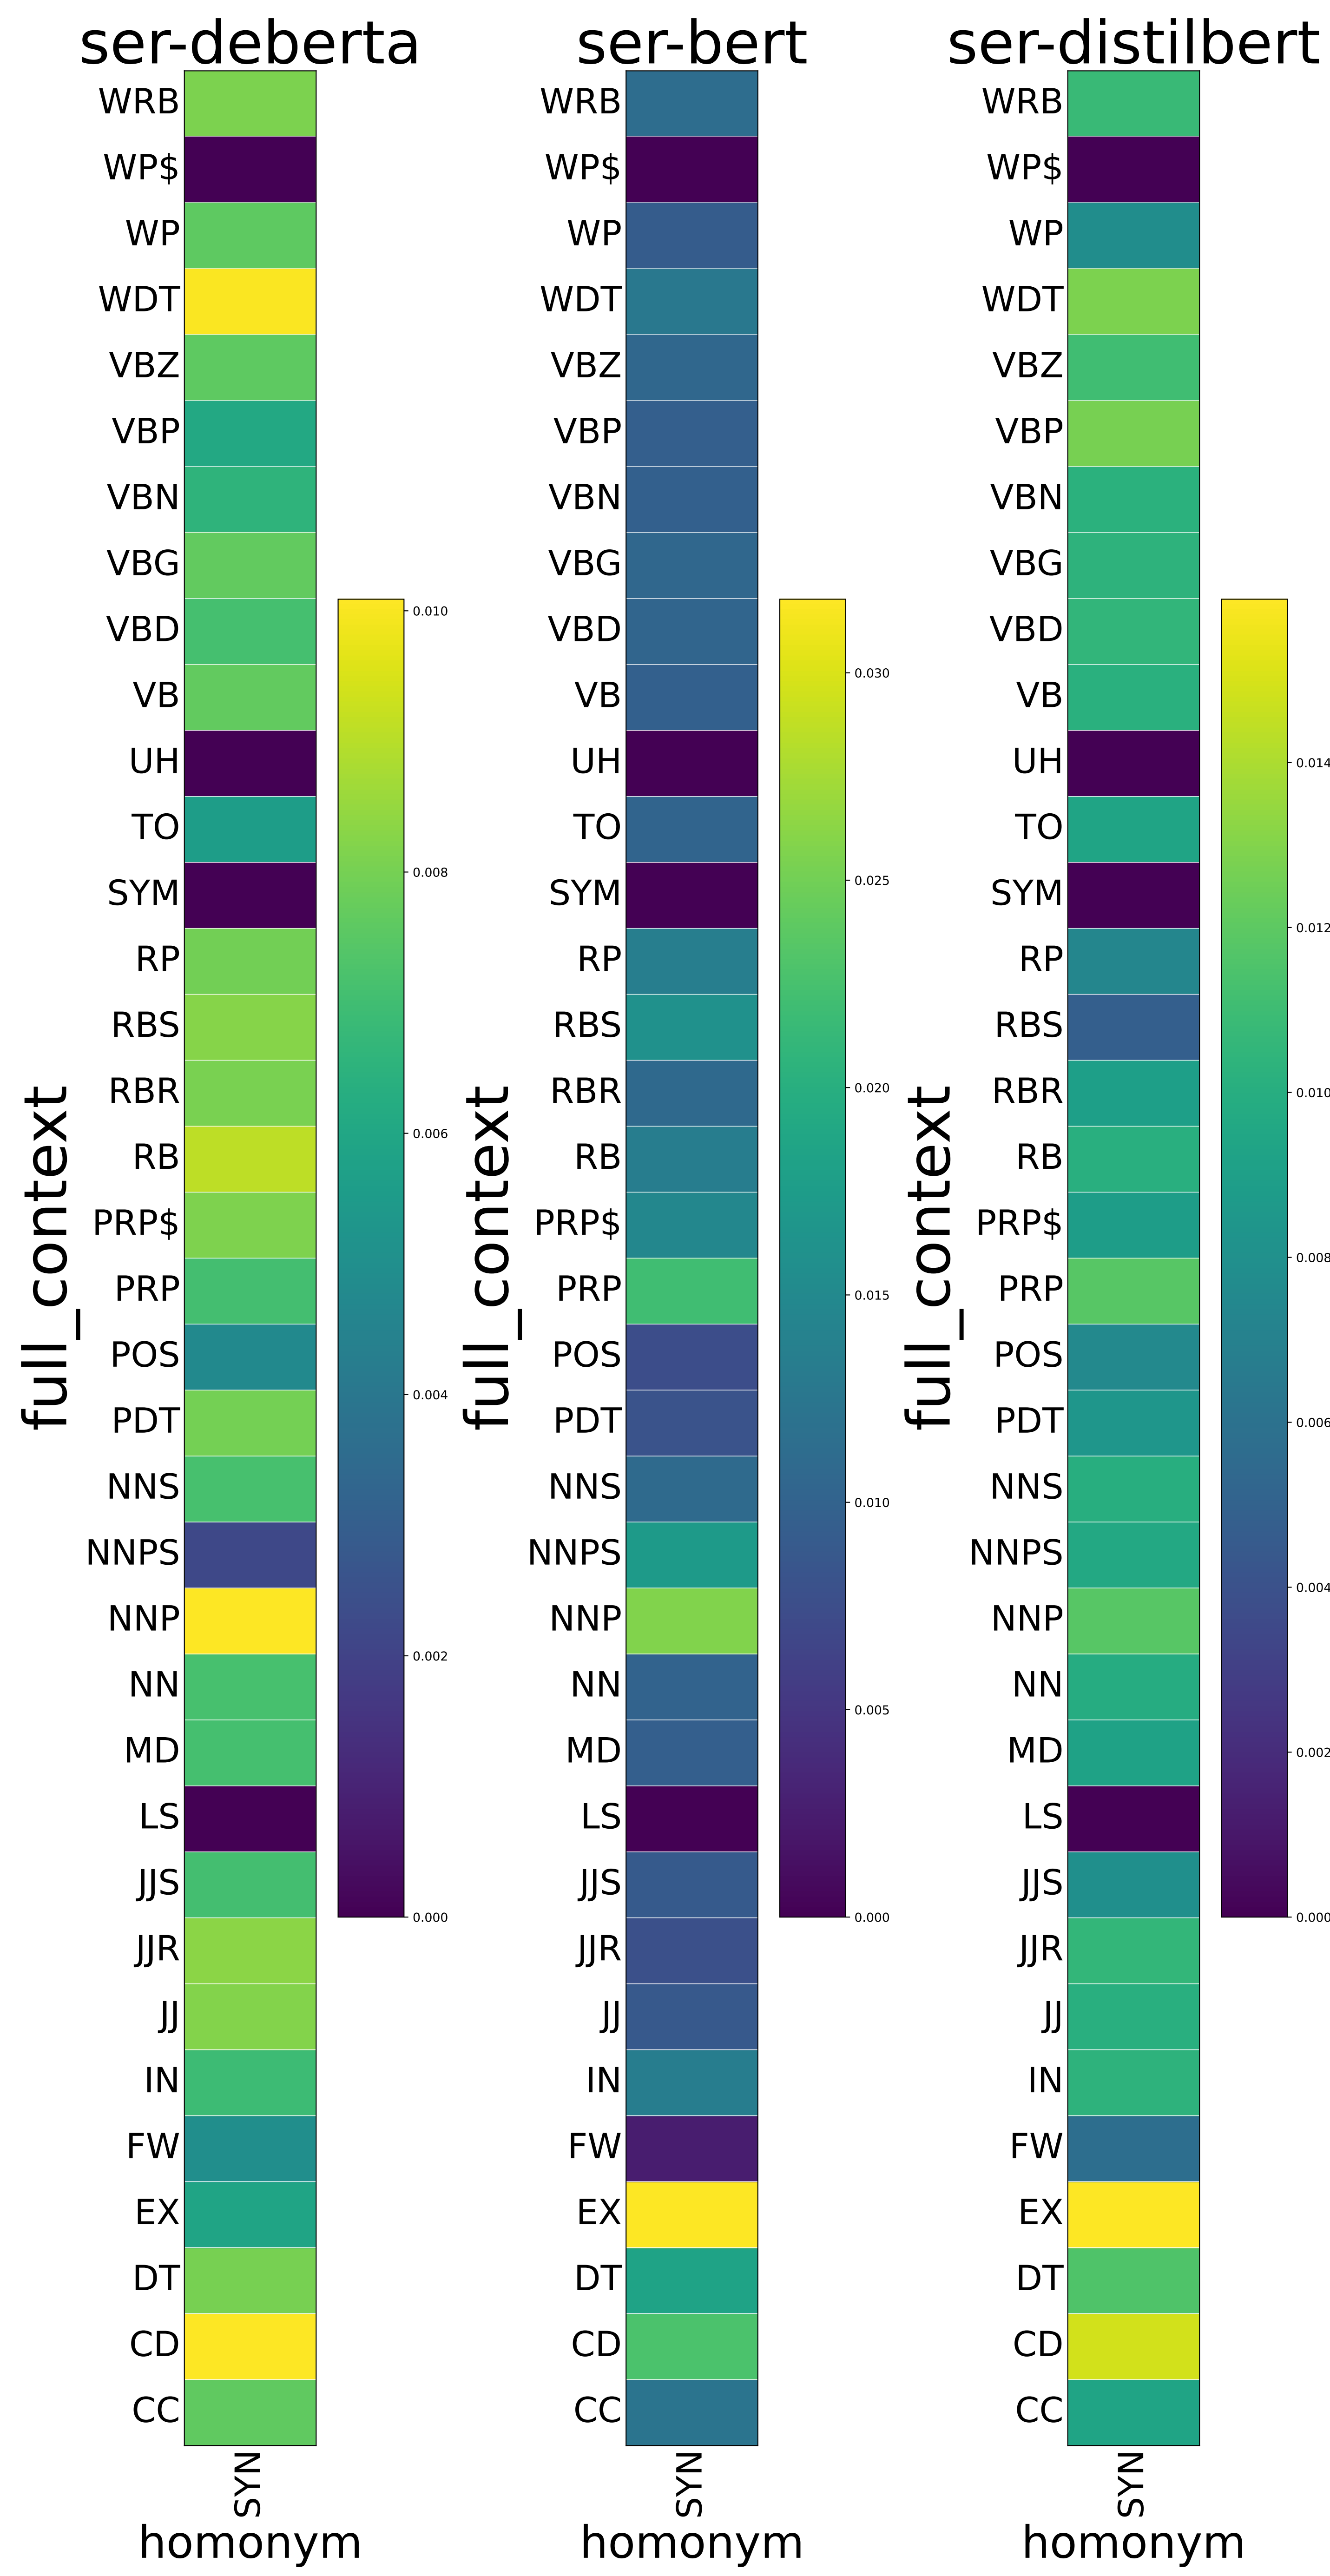

Supplement: SupplementaryMaterial [file ser_std_all.pdf › figures/ser_std_all.pdf]

# Standard Deviation of <full\_context, homonym> Negative Example Pairs

## Similarity Scores for SER

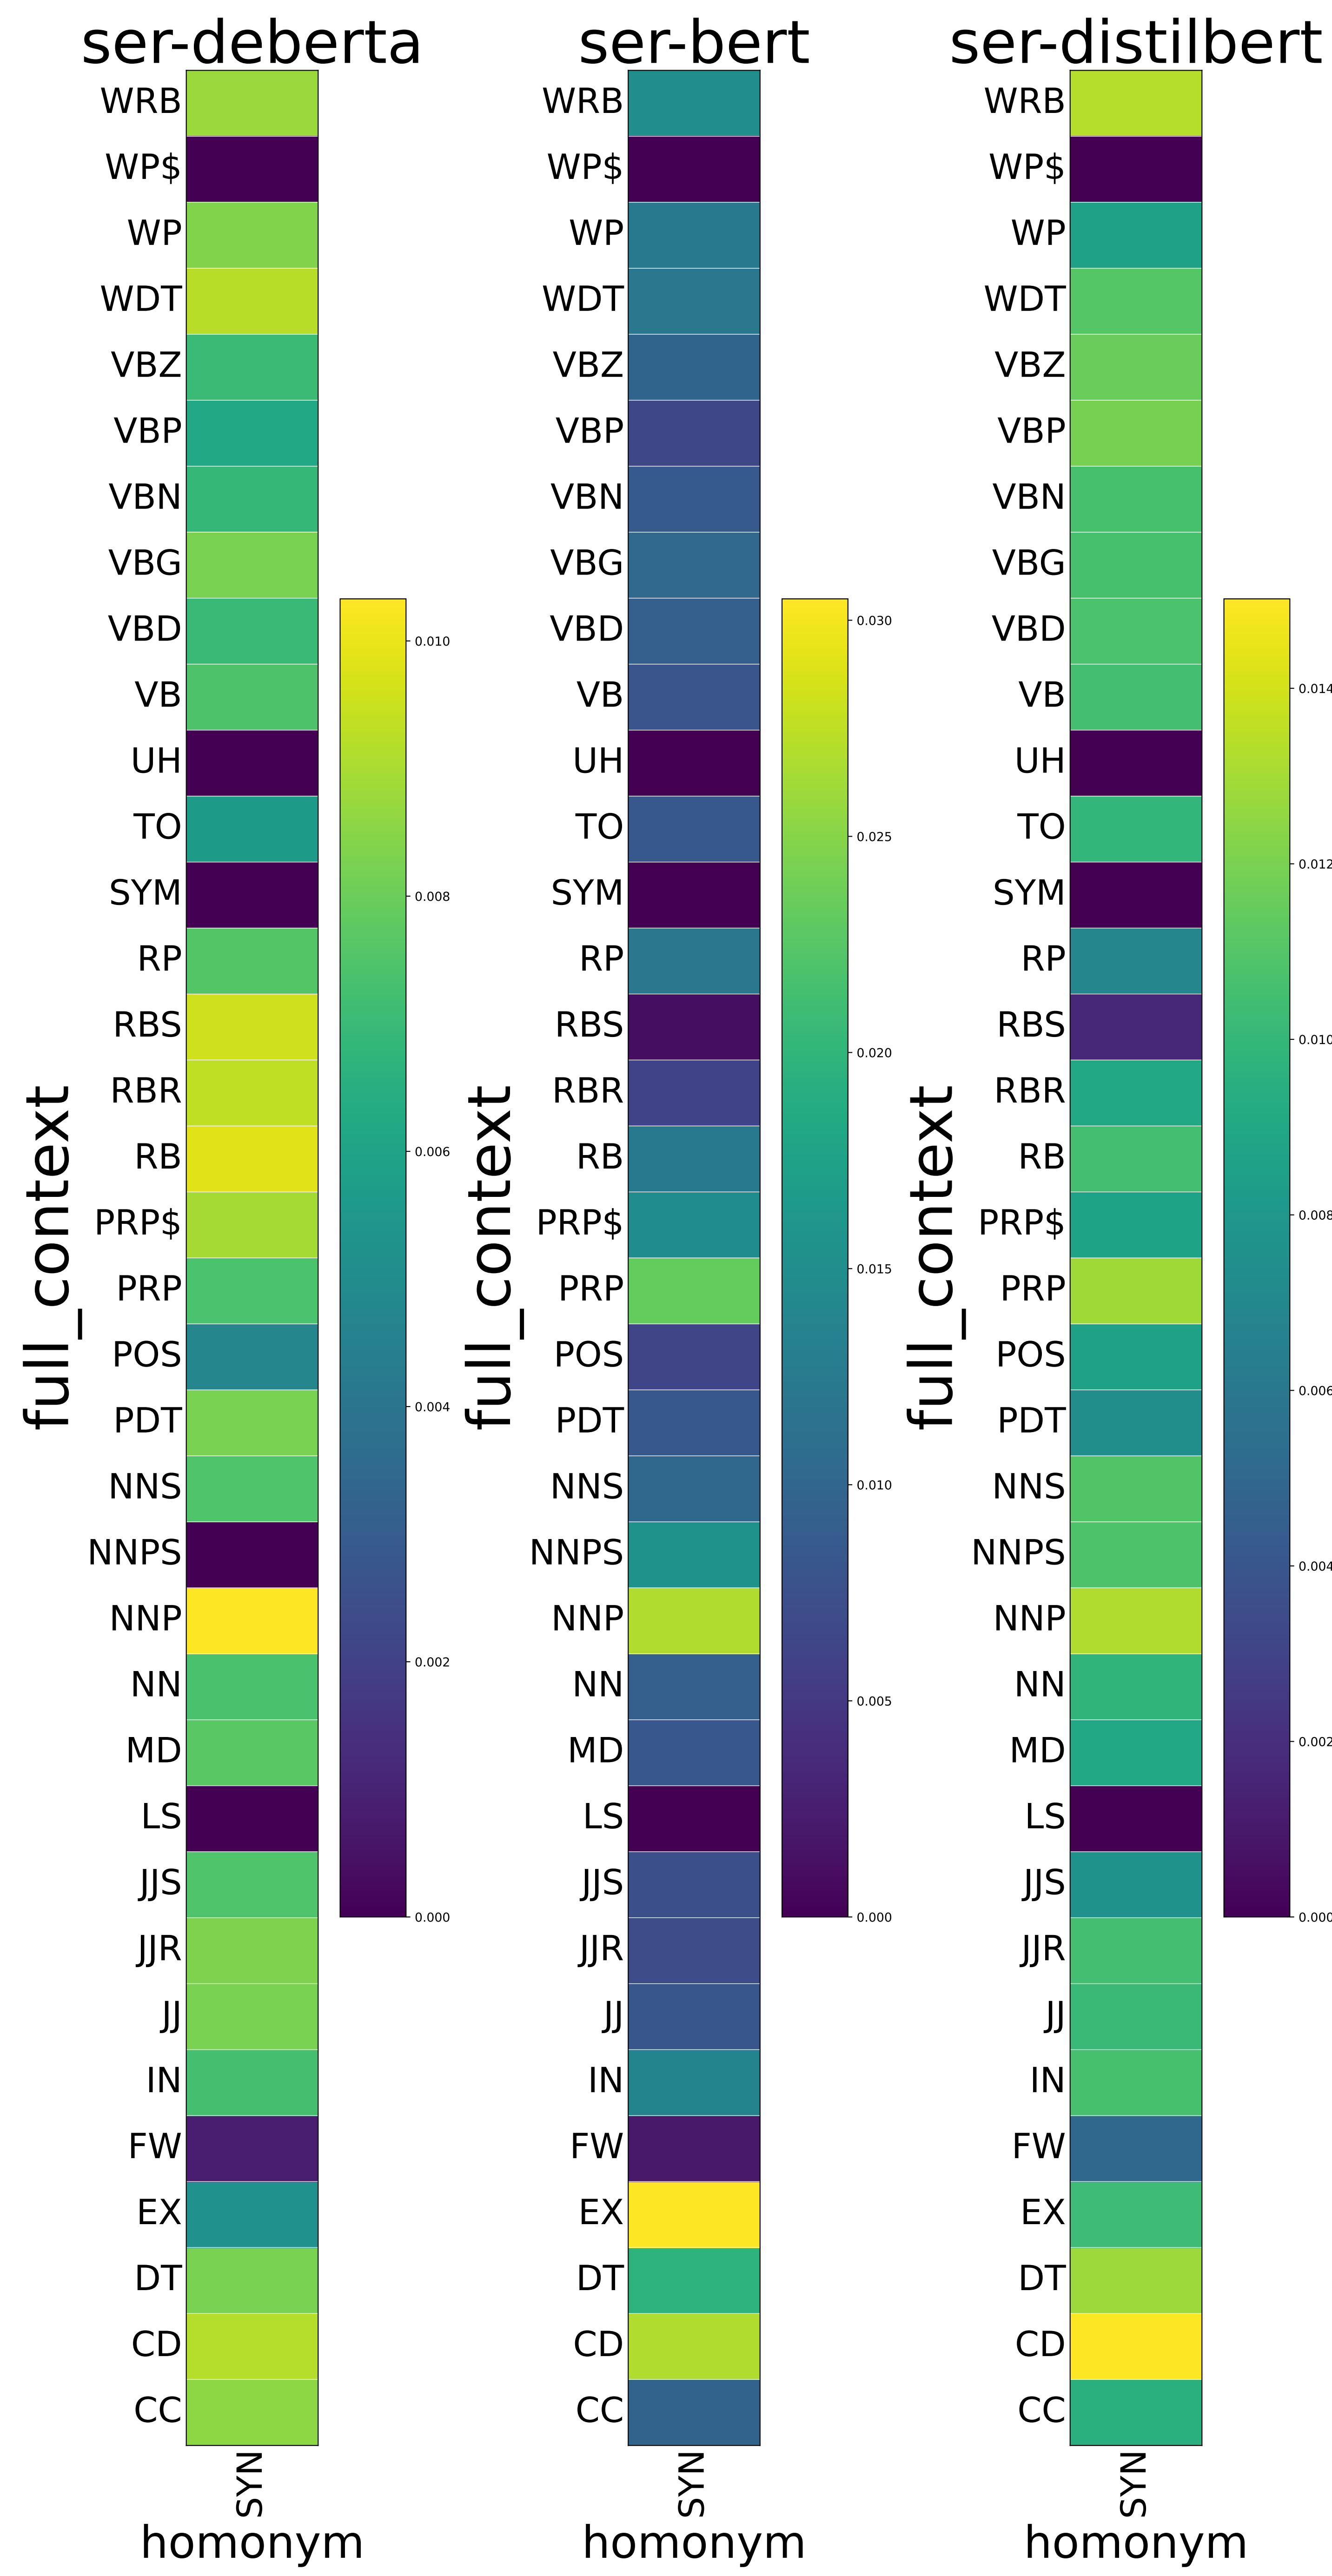

Supplement: SupplementaryMaterial [file ser_std_negative.pdf › figures/ser_std_negative.pdf]

# Standard Deviation of <full\_context, homonym> Neutral Example Pairs Similarity Scores for SER

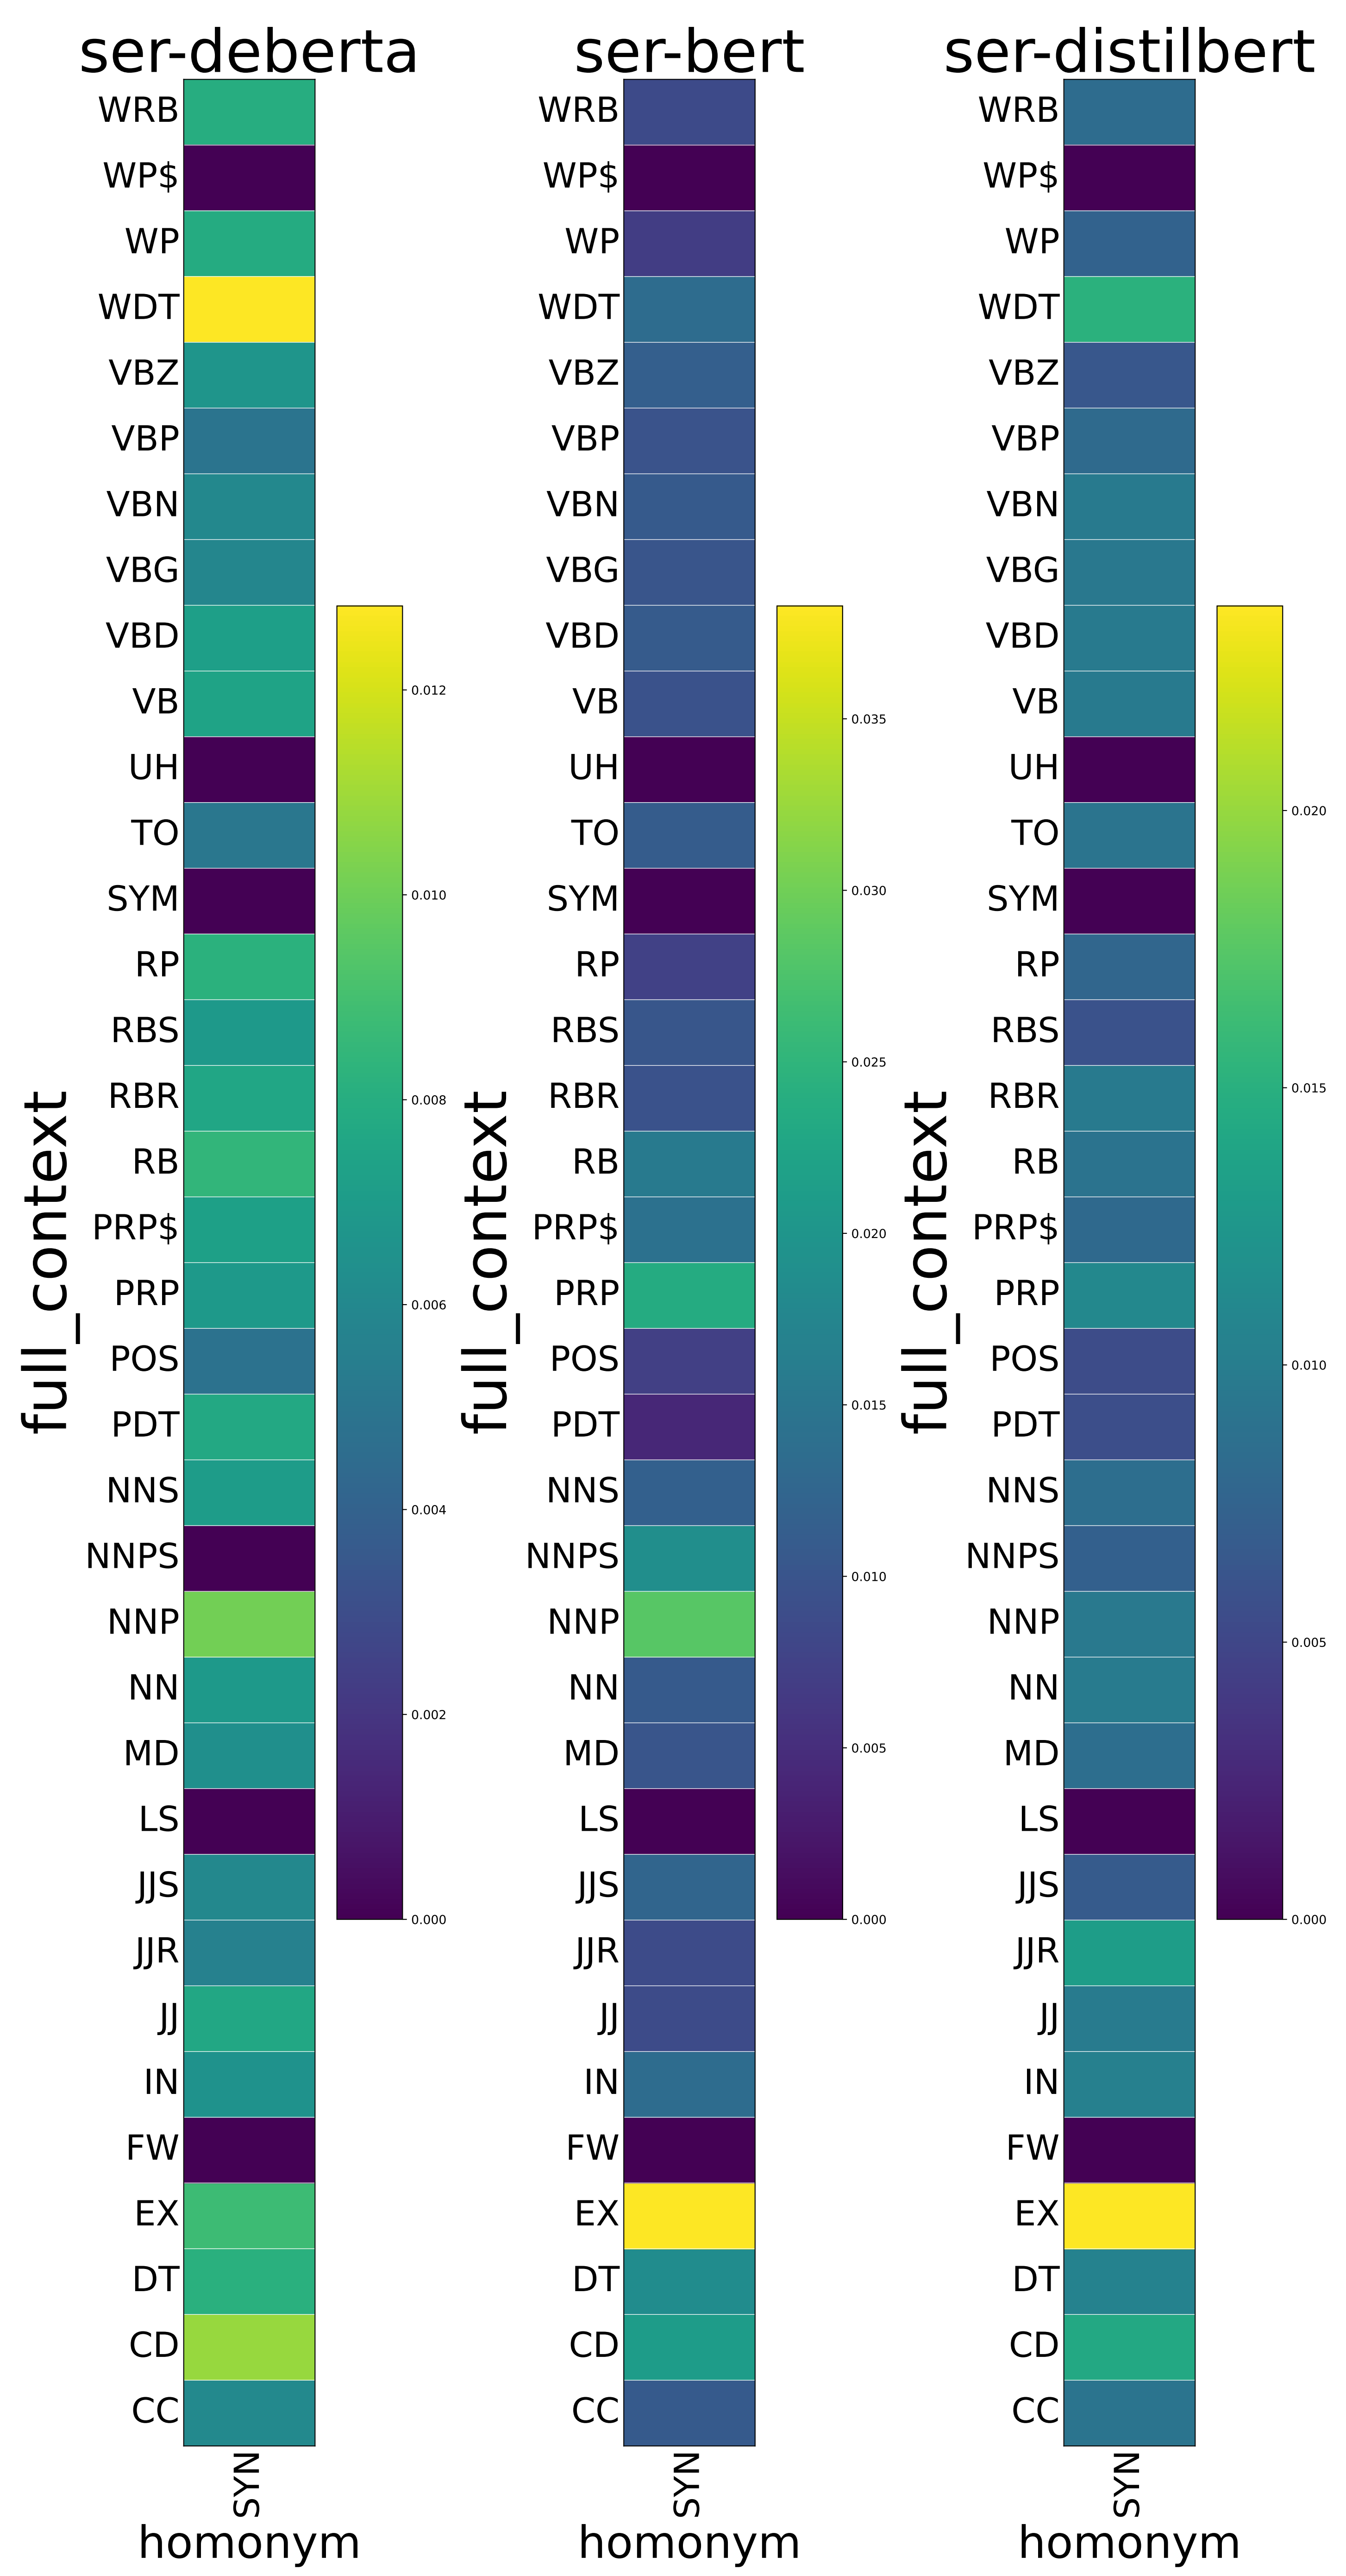

Supplement: SupplementaryMaterial [file ser_std_neutral.pdf › figures/ser_std_neutral.pdf]

# Standard Deviation of <full\_context, homonym> Positive Example Pairs Similarity Scores for SER

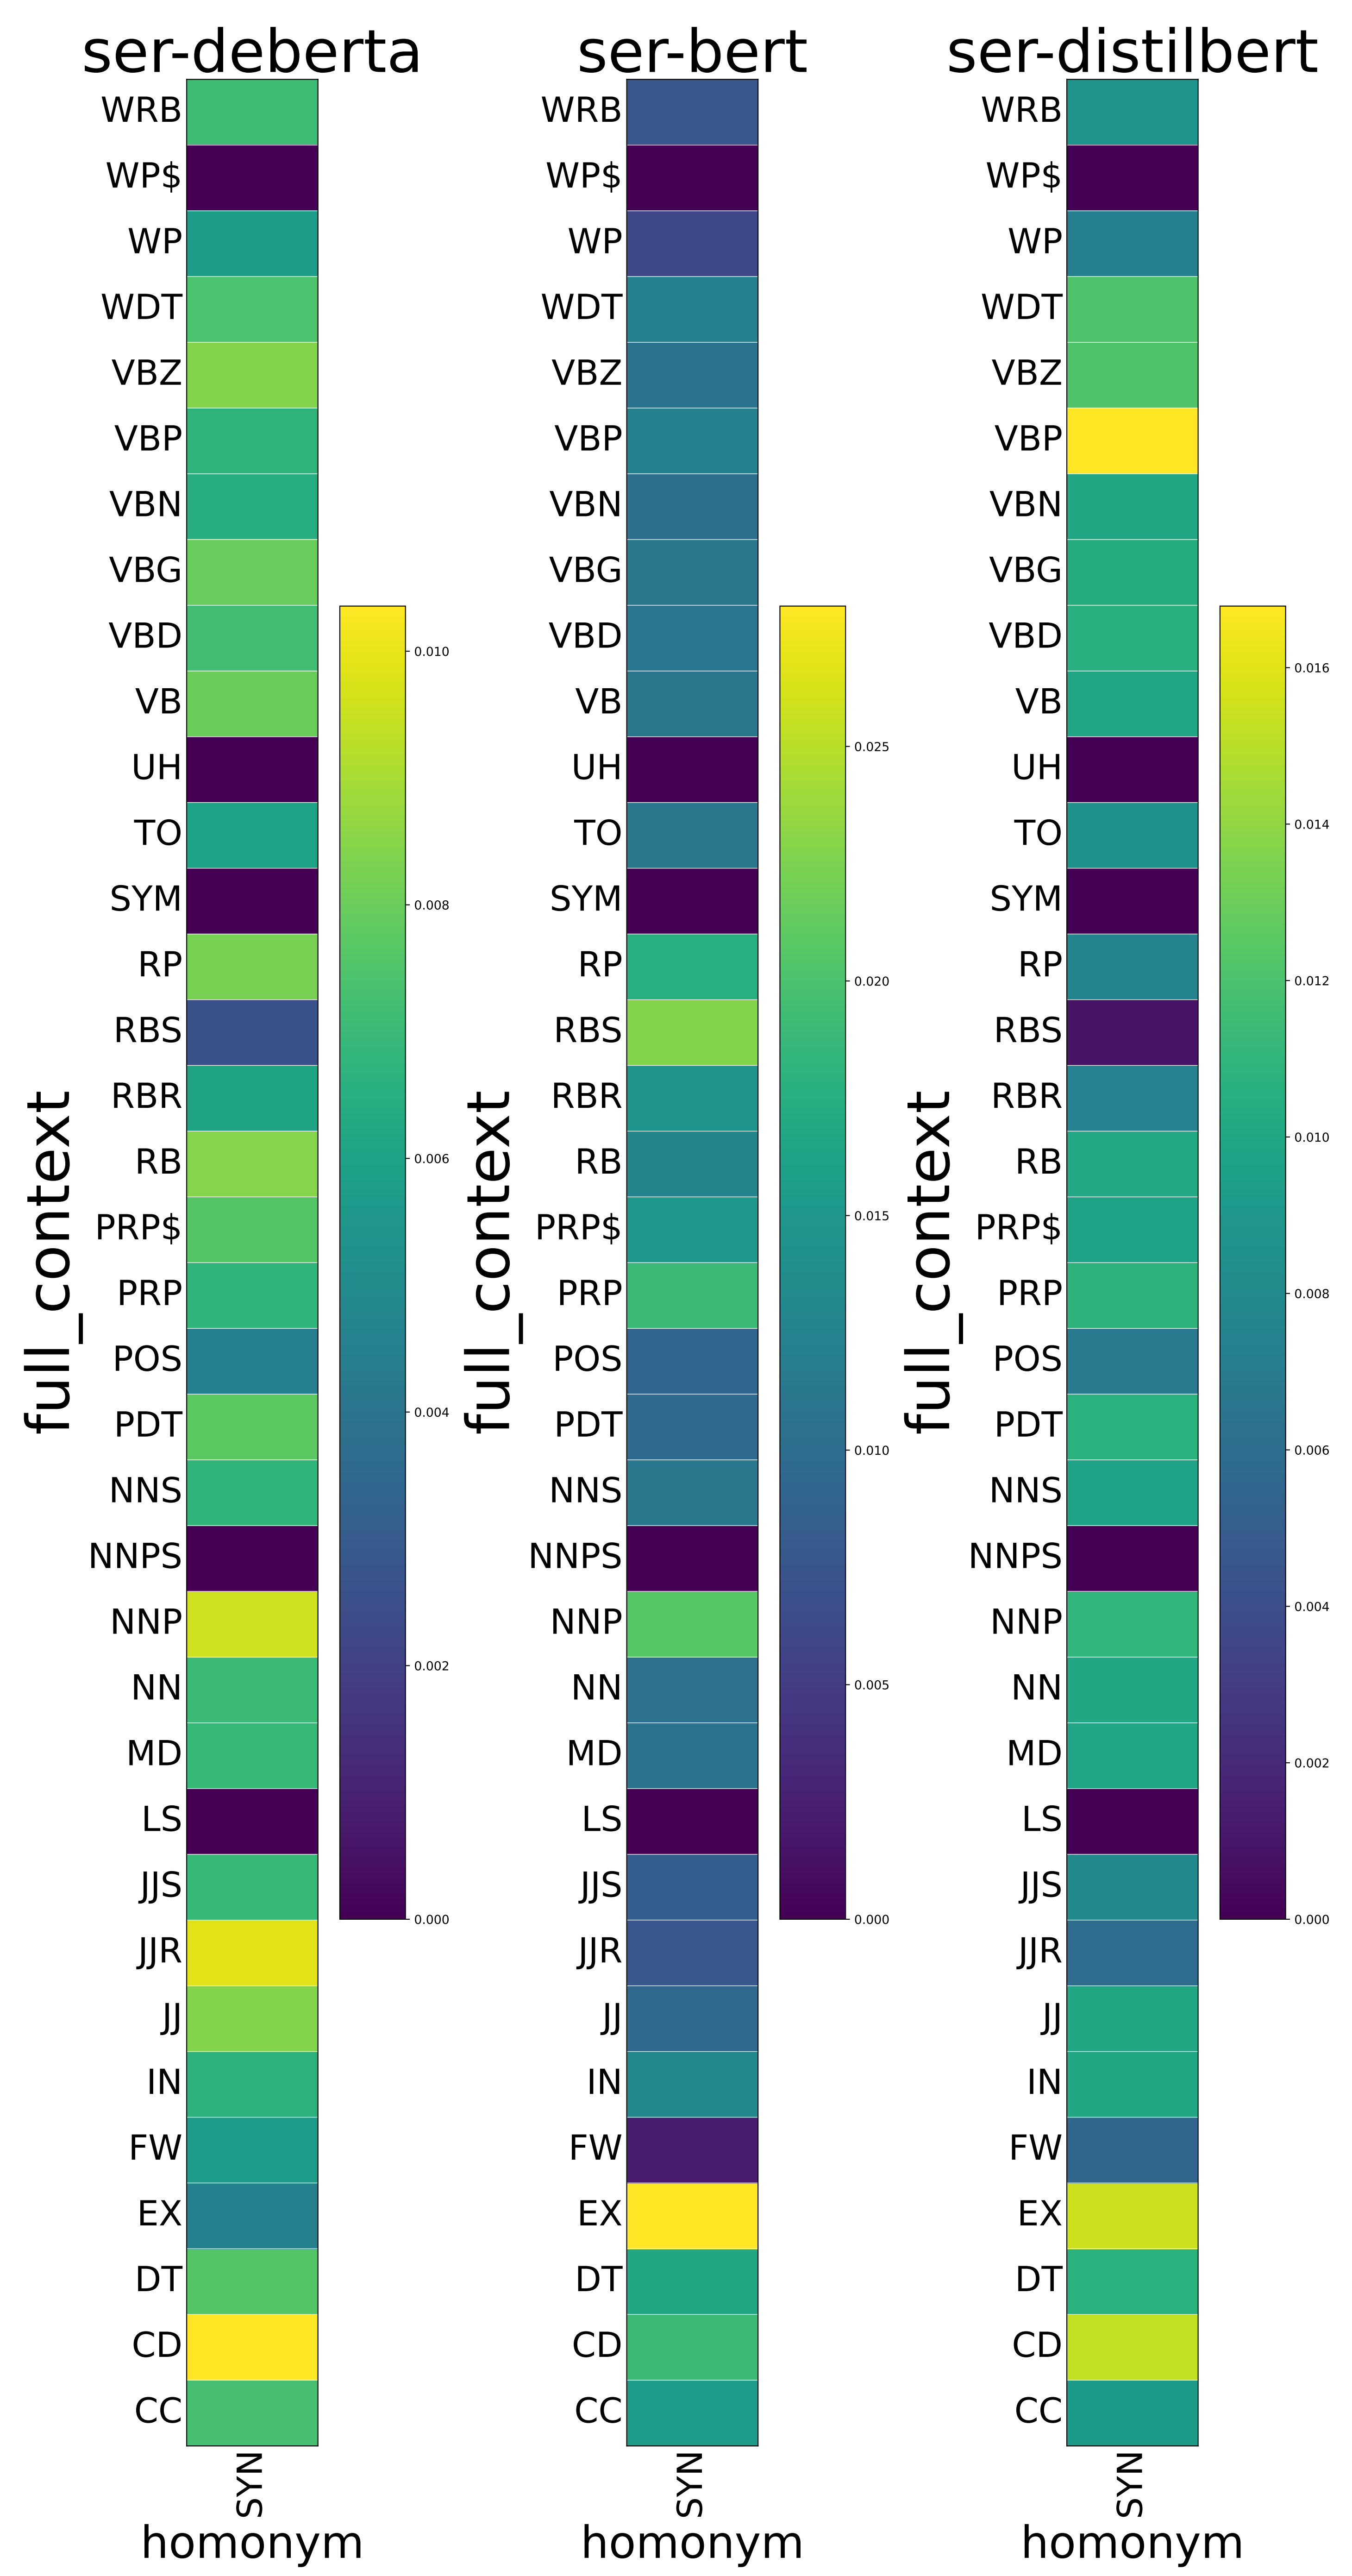

Supplement: SupplementaryMaterial [file ser_std_positive.pdf › figures/ser_std_positive.pdf]
